# Supplementary material for: Misfolded proteins bind and activate death receptor 5 to trigger apoptosis during unresolved endoplasmic reticulum stress
Source: eLife journal article supplement (doi:10.7554/elife.52291), 2020-01-06
Supplement: fig1-data1 [file Source Data Fig 1G C8 glo MPZ-GFP IP.xlsx]

## Sheet: 2019-02-05
	legend								empty		cytoGFP		MPZ GFP				buffer
									GFP IP		GFP IP		GFP IP				buffer
									1x		1x		1x				buffer
##BLOCKS= 1
Plate:	Plate01	1.3	PlateFormat	Endpoint	Luminescence	Raw	FALSE	1						1	0	1	24	384						1	Automatic
	Temperature(°C)	1	2	3	4	5	6	7	8	9	10	11	12	13	14	15	16	17	18	19	20	21	22	23	24
	29.9
									78.056		78.056		170.05				25.089
									58.542		19.514		72.48				36.24
									64.117		39.028		105.932				25.089
								average	66.905		45.5327		116.154				28.806
								buffer background subtracted			fold change relative to empty by row
traffo	sample	dilution	Row B	Row C	Row D			Row B	Row C	Row D	Row B	Row C	Row D	average fold change	st dev	traffo
empty	GFP IP	0.0666667	78.056	58.542	64.117			49.25	29.736	35.311	1	1	1	1	0	empty
cytoGFP	GFP IP	0.0666667	78.056	19.514	39.028			49.25	-9.292	10.222	1	-0.312483	0.289485	0.644742	0.50241	cytoGFP
MPZ GFP	GFP IP	0.0666667	170.05	72.48	105.932			141.244	43.674	77.126	2.8679	1.46872	2.18419	2.17361	0.699647	MPZ GFP

## Sheet: 2018-02-11
																										background substracted												Fold change relative to empty average
##BLOCKS= 1																			construct	sample	dilution	rep1	rep2	rep3	average baackground	rep1	rep2	rep3	correction factor (from quant)	normalized rep1	normalized rep2	normalized rep3	average	st dev	construct	sample	dilution	rep1	rep2	rep3	average fold change	st dev fold change	construct	sample
Plate:	Plate01	1.3	PlateFormat	Endpoint	Luminescence	Raw	FALSE	1						1	0	1	16	384	blank	blank		19.365	24.898	13.832	19.365										blank	blank							blank	blank
	Temperature(¡C)	1	2	3	4	5	6	7	8	9	10	11	12	13	14	15	16	17	cytoGFP	GFP beads	0.0666667	27.665	24.898	27.665		8.3	5.533	8.3					26.7427	1.59753	cytoGFP	GFP beads	0.0666667	1.25002	1.12499	1.25002	1.20834	0.0721829	cytoGFP	GFP beads
	23.2										blank								empty	GFP beads	0.0666667	16.599	24.898	24.898		-2.766	5.533	5.533					22.1317	4.79143	empty	GFP beads	0.0666667	0.750011	1.12499	1.12499	1	0.216497	empty	GFP beads
	construct												empty		MPZ		cytoGFP		MPZ	GFP beads	0.0666667	91.294	80.228	60.863		71.929	60.863	41.498					77.4617	15.403	MPZ	GFP beads	0.0666667	4.12504	3.62503	2.75004	3.50004	0.695969	MPZ	GFP beads
	sample												GFP beads		GFP beads		GFP beads
	dilution
													16.599		91.294		27.665
													24.898		80.228		24.898																						absolute RLUs	st dev	average fold change	st dev fold change	construct	sample
													24.898		60.863		27.665																						22.1317	4.79143	1	0.216497	empty	GFP beads
																																							26.7427	1.59753	1.20834	0.0721829	GFP	GFP beads
																																							77.4617	15.403	3.50004	0.695969	MPZ	GFP beads
~End

## Sheet: 2019-12-01
##BLOCKS= 3
Plate:	Plate01	IP beads		Endpoint	Luminescence	Raw	FALSE	1						1	0	1	2	384						1	Automatic			1	3	None
	Technical Reps	GFP	MPZ-GFP	dilution		5	6	7	8	9	10	11	12	13	14	15	16	17	18	19	20	21	22	23	24
	1	110.873	239.726	0.1
	2	116.866	254.709	0.1
	3	260.702	578.338	0.2
	AVERAGE	162.814
	corrected for dilution	GFP	MPZ-GFP	avg fold change	GFP	MPZ-GFP
		110.873	239.726		0.92887	2.00837
		116.866	254.709		0.979078	2.1339
		130.351	289.169		1.09205	2.42259
	average	119.363	261.201		1	2.18829
~End

## Sheet: Compiled
		average fold change
construct	sample	Rep 2019-02-05	Rep 2019-02-11	Rep 2019-12-01	average of averages	SEM
empty	GFP beads	1	1	-	1	1.57009e-16
GFP	GFP beads	0.644742	1.20834	1	0.951029	0.16453
MPZ	GFP beads	2.17361	3.50004	2.18829	2.62064	0.439717

## Sheet: unpaired t tests
Table Analyzed	Data 1		Table Analyzed	Data 1
Column C	MPZ		Column B	GFP
vs.	vs.		vs.	vs.
Column B	GFP		Column A	empty vector
Unpaired t test			Unpaired t test
P value	0.0237		P value	0.8325
P value summary	*		P value summary	ns
Significantly different? (P < 0.05)	Yes		Significantly different? (P < 0.05)	No
One- or two-tailed P value?	Two-tailed		One- or two-tailed P value?	Two-tailed
t, df	t=3.556 df=4		t, df	t=0.2306 df=3
How big is the difference?			How big is the difference?
Mean ± SEM of column B	0.9510 ± 0.1645, n=3		Mean ± SEM of column A	1.000 ± 0.0, n=2
Mean ± SEM of column C	2.621 ± 0.4397, n=3		Mean ± SEM of column B	0.9510 ± 0.1645, n=3
Difference between means	1.670 ± 0.4695		Difference between means	-0.04897 ± 0.2124
95% confidence interval	0.3661 to 2.973		95% confidence interval	-0.7249 to 0.6270
R squared	0.7597		R squared	0.01741
F test to compare variances			F test to compare variances
F,DFn, Dfd	7.143, 2, 2		F,DFn, Dfd
P value	0.2456		P value
P value summary	ns		P value summary
Significantly different? (P < 0.05)	No		Significantly different? (P < 0.05)
