# Supplementary material for: Misfolded proteins bind and activate death receptor 5 to trigger apoptosis during unresolved endoplasmic reticulum stress
Source: eLife journal article supplement (doi:10.7554/elife.52291), 2020-01-06
Supplement: fig1-data1 [file Source Data Fig 1S3 C8 glo inputs.xlsx]

## Sheet: Sheet1
																										background substracted														Fold change relative to empty average								sample	dilution
##BLOCKS= 1																			construct	sample	dilution	rep1	rep2	rep3	average baackground	rep1	rep2	rep3	correction factor (from Coomasie quant) rep 1	correction factor (from Coomasie quant) rep 2	correction factor (from Coomasie quant) rep 3	normalized rep1	normalized rep2	normalized rep3	average	st dev	construct	sample	dilution	rep1	rep2	rep3	average fold change	st dev fold change	construct	sample		input	0.02
Plate:	Plate01	1.3	PlateFormat	Endpoint	Luminescence	Raw	FALSE	1						1	0	1	16	384	blank	blank		19.365	24.898	13.832	19.365												blank	blank							blank	blank		input	0.02
	Temperature(¡C)	1	2	3	4	5	6	7	8	9	10	11	12	13	14	15	16	17	cytoGFP	GFP beads	0.0666667	27.665	24.898	27.665		8.3	5.533	8.3							26.7427	1.59753	cytoGFP	GFP beads	0.0666667	1.25002	1.12499	1.25002	1.20834	0.0721829	cytoGFP	GFP beads		input	0.02
	23.2										blank								empty	GFP beads	0.0666667	16.599	24.898	24.898		-2.766	5.533	5.533							22.1317	4.79143	empty	GFP beads	0.0666667	0.750011	1.12499	1.12499	1	0.216497	empty	GFP beads		input	0.02
	construct	empty	MPZ	empty	cyto-GFP	empty	cyto-GFP	empty + tg	cyto-GFP	empty + Tg	blank	empty + Tg	empty	MPZ	MPZ	MPZ	cytoGFP		MPZ	GFP beads	0.0666667	91.294	80.228	60.863		71.929	60.863	41.498							77.4617	15.403	MPZ	GFP beads	0.0666667	4.12504	3.62503	2.75004	3.50004	0.695969	MPZ	GFP beads
	sample	input	input	input	input	input	input	input	input	input	blank	input	GFP beads	input	GFP beads	input	GFP beads		cyto-GFP	input	0.005	271.115	213.019	240.684		251.75	193.654	221.319	0.621776	0.612362	0.633768	404.889	316.241	349.211	356.78	44.8058	cyto-GFP	input	0.005
	dilution	0.02	0.005	0.01	0.02	0.005	0.01	0.02	0.005	0.01		0.005		0.02		0.01			cyto-GFP	input	0.01	481.368	445.404	511.799		462.003	426.039	492.434	0.621776	0.612362	0.633768	743.038	695.731	776.994	738.587	40.8141	cyto-GFP	input	0.01
	rep 1	1200.65	171.522	713.753	973.802	384.541	481.368	1867.38	271.115	821.646	19.365	486.901	16.599	1186.82	91.294	558.83	27.665		cyto-GFP	input	0.02	973.802	946.137	874.209		954.437	926.772	854.844	0.621776	0.612362	0.633768	1535.02	1513.44	1348.83	1465.76	101.84	cyto-GFP	input	0.02									sample	dilution
	rep 2	1253.22	240.684	572.662	946.137	331.978	445.404	1698.62	213.019	838.244	24.898	423.272	24.898	1029.13	80.228	500.733	24.898		empty	input	0.005	384.541	331.978	376.242		365.176	312.613	356.877	1	1	1	365.176	312.613	356.877	344.889	28.2579	empty	input	0.005		absolute RLUs	st dev	average fold change	st dev fold change	construct	sample		input	0.02
	rep 3	1261.52	204.72	724.819	874.209	376.242	511.799	1933.77	240.684	888.041	13.832	544.997	24.898	1109.36	60.863	365.176	27.665		empty	input	0.01	713.753	572.662	724.819		694.388	553.297	705.454	1	1	1	694.388	553.297	705.454	651.046	84.834	empty	input	0.01		22.1317	4.79143	1	0.216497	empty	GFP beads		input	0.02
																			empty	input	0.02	1200.65	1253.22	1261.52		1181.29	1233.85	1242.15	1	1	1	1181.29	1233.85	1242.15	1219.1	33.0049	empty	input	0.02		26.7427	1.59753	1.20834	0.0721829	GFP	GFP beads		input	0.02
																			empty + Tg	input	0.005	486.901	423.272	544.997		467.536	403.907	525.632	0.641125	0.691406	0.848551	729.243	584.182	619.447	644.291	75.6542	empty + Tg	input	0.005		77.4617	15.403	3.50004	0.695969	MPZ	GFP beads		input	0.02
																			empty + Tg	input	0.01	821.646	838.244	888.041		802.281	818.879	868.676	0.641125	0.691406	0.848551	1251.36	1184.37	1023.72	1153.15	116.99	empty + Tg	input	0.01
																			empty + tg	input	0.02	1867.38	1698.62	1933.77		1848.01	1679.26	1914.41	0.641125	0.691406	0.848551	2882.45	2428.76	2256.09	2522.43	323.517	empty + tg	input	0.02									GFP beads	0.0666667
																			MPZ	input	0.005	171.522	240.684	204.72		152.157	221.319	185.355	0.353212	0.452004	0.51446	430.78	489.64	360.29	426.903	64.7618	MPZ	input	0.005									GFP beads	0.0666667
																			MPZ	input	0.01	558.83	500.733	365.176		539.465	481.368	345.811	0.353212	0.452004	0.51446	1527.31	1064.96	672.182	1088.15	428.035	MPZ	input	0.01									GFP beads	0.0666667
																			MPZ	input	0.02	1186.82	1029.13	1109.36		1167.46	1009.77	1089.99	0.353212	0.452004	0.51446	3305.25	2233.98	2118.72	2552.65	654.316	MPZ	input	0.02
																													sample	dilution	construct	normalized rep1	normalized rep2	normalized rep3	construct	sample	dilution	fold change relative to empty
																													input	0.02	empty	743.038	695.731	776.994	cyto-GFP	input	0.01	1.07006	1.25743	1.10141
~End																													input	0.02	GFP	694.388	553.297	705.454	empty	input	0.01	1	1	1
																													input	0.02	MPZ	1251.36	1184.37	1023.72	empty + Tg	input	0.01	1.80211	2.14057	1.45115
																													input	0.02	empty + tg	1527.31	1064.96	672.182	MPZ	input	0.01	2.19951	1.92476	0.952836
																																1535.02	1513.44	1348.83	cyto-GFP	input	0.02	1.29944	1.2266	1.08588
																																1181.29	1233.85	1242.15	empty	input	0.02	1	1	1
																																2882.45	2428.76	2256.09	empty + tg	input	0.02	2.44009	1.96843	1.81628
																																3305.25	2233.98	2118.72	MPZ	input	0.02	2.798	1.81057	1.70568

																																				construct	sample	fold change relative to empty
																																						dilution 0.01			dilution 0.02			average	SEM
																																				empty	input	1	1	1	1	1	1	1	0
																																				GFP	input	1.07006	1.25743	1.10141	1.29944	1.2266	1.08588	1.17347	0.0405373
																																				MPZ	input	2.19951	1.92476	0.952836	2.798	1.81057	1.70568	1.89856	0.247628
[truncated: 10 more columns]

## Sheet: Coomassie quant
	Area	mean	IntDen	RawIntDen	sample	bg corrected	norm factor relative to empty	sample	Rep
1	0.017	43838.3	738.521	38928447		4433360	1	empty	1
2	0.017	42046.7	708.337	37337426		2842339	0.641125	empty + tg	1
3	0.017	40609.2	684.122	36061005		1565918	0.353212	MPZ	1
4	0.017	41432.7	697.994	36792218		2297131	0.621776	cytoGFP	1
background	0.017	38845.8	654.414	34495087		0
1	0.017	43735.8	736.794	38837428		4972196	1	empty	2
2	0.017	42007.9	707.685	37303036		3437804	0.691406	empty + tg	2
3	0.017	40667.4	685.102	36112684		2247452	0.452004	MPZ	2
4	0.017	41565.3	700.229	36910016		3044784	0.612362	cytoGFP	2
background	0.017	38136.5	642.465	33865232		0
1	0.011	38172.6	434.602	23208924		3117380	1	empty	3
2	0.011	37396.1	425.761	22736800		2645256	0.848551	empty + tg	3
3	0.011	35683.1	406.259	21695312		1603768	0.51446	MPZ	3
4	0.011	36294.8	413.223	22067240		1975696	0.633768	cytoGFP	3
5	0.011	33045.3	376.227	20091544		0

## Sheet: Prism T test
Table Analyzed	Data 1	Data 1	Data 1		normalized rep1	normalized rep2	normalized rep3	construct	sample	dilution	fold change relative to empty
Column B	GFP	MPZ	MPZ		694.388	553.297	705.454	empty	input	0.01	1	1	1
vs.	vs.	vs.	vs.		743.038	695.731	776.994	cyto-GFP	input	0.01	1.07006	1.25743	1.10141
Column A	empty	empty	GFP		1527.31	1064.96	672.182	MPZ	input	0.01	2.19951	1.92476	0.952836
Unpaired t test					1181.29	1233.85	1242.15	empty	input	0.02	1	1	1
P value	0.0016	0.0046	0.0161		1535.02	1513.44	1348.83	cyto-GFP	input	0.02	1.29944	1.2266	1.08588
P value summary	**	**	*		3305.25	2233.98	2118.72	MPZ	input	0.02	2.798	1.81057	1.70568
Significantly different? (P < 0.05)	Yes	Yes	Yes
One- or two-tailed P value?	Two-tailed	Two-tailed	Two-tailed
t, df	t=4.279 df=10	t=3.629 df=10	t=2.890 df=10
How big is the difference?
Mean ± SEM of column A	1.000 ± 0.0, n=6	1.000 ± 0.0, n=6	1.173 ± 0.04054, n=6
Mean ± SEM of column B	1.173 ± 0.04054, n=6	1.899 ± 0.2476, n=6	1.899 ± 0.2476, n=6
Difference between means	0.1735 ± 0.04054	0.8986 ± 0.2476	0.7251 ± 0.2509
95% confidence interval	0.08315 to 0.2638	0.3468 to 1.450	0.1660 to 1.284
R squared	0.6468	0.5684	0.455
F test to compare variances
F,DFn, Dfd			37.32, 5, 5
P value			0.0012
P value summary			**
Significantly different? (P < 0.05)			Yes
