# Supplementary material for: Misfolded proteins bind and activate death receptor 5 to trigger apoptosis during unresolved endoplasmic reticulum stress
Source: eLife journal article supplement (doi:10.7554/elife.52291), 2020-01-06
Supplement: fig1-data2 [file Source Data Fig 1S5C - DR5 input levels.xlsx]

## Sheet: Sheet1
Rep		INTDEN	bg subtracted
2	GAPDH - GFP	58296	7613
2	GAPDH - mpz	62481	3428
background		65909
3	GAPDH - GFP	74017	9919
3	GAPDH - mpz	82459	1477
background		83936
Rep			DR5 int	GAPDH int	normalized DR5 to GAPDH	input	Rep
2	DR5 - GFP	1057.94	959.292	7613	0.126007	GFP	2
2	DR5 - mpz	837.732	739.08	3428	0.215601	MPZ	2
background		98.652
3	DR5 - GFP	792.606	696.557	9919	0.0702245	GFP	3
3	DR5 - mpz	453.993	357.944	1477	0.242345	MPZ	3
background		96.049
						DR5 levels normalized to GAPDH
					input	GFP	MPZ
					rep 2	0.126007	0.215601
					rep 3	0.0702245	0.242345
					average	0.0981158	0.228973
					Stdev	0.0394442	0.0189111
