# Supplementary material for: Misfolded proteins bind and activate death receptor 5 to trigger apoptosis during unresolved endoplasmic reticulum stress
Source: eLife journal article supplement (doi:10.7554/elife.52291), 2020-01-06
Supplement: fig1-data2 [file Source Data Fig 1S5C Quantification of GFP MPZ INS RHO IP.xlsx]

## Sheet: 2018-02-27
sample	area	mean	int den	raw int den	background subtracted		sample	input (*dilution factor)	beads (*dilution factor)	fraction IP'ed
input - empty	0.073	85.914	6.289	2264011	1295208		empty	12952080	412468	0.0318457
input - GFP	0.073	83.649	6.123	2204328	1354891		GFP	13548910	467290	0.0344891
input - MPZ	0.073	82.605	6.047	2176812	1382407		MPZ	13824070	1.45333e+06	0.105131
beads - empty	0.073	125.673	9.199	3311738	247481
beads - GFP	0.073	124.425	9.108	3278845	280374
beads - MPZ	0.073	101.974	7.465	2687220	871999
background	0.073	135.064	9.887	3559219
calculation of dilution factor:	ul incubated with beads	ul mixed with sample buffer (40 ul total)	ul loaded onto gel	dilution factor
input	250	30	25	0.1
calculation of dilution factor:	ul of sample buffer incubated with beads for elution	ul of sample buffer recovered after removal of beads	ul loaded onto gel
beads	50	35	30	0.6

## Sheet: 2019-12-12
replicate	sample	area	mean	int den	raw int den	background subtracted		rep	sample	input (*dilution factor)	beads	fraction IP'ed
2	input GFP	0.057	18054	1027.52	26539314	24265838		2	GFP	242658380	73040	0.000300999
2	input MPZ	0.057	14588.2	830.267	21444613	19171137		2	MPZ	191711370	11158310	0.0582037
2	beads GFP	0.057	1566.46	89.153	2302692	29216		3	GFP	178547120	469330	0.00262861
2	beads MPZ	0.057	4582.86	260.827	6736800	4463324		3	MPZ	91647520	12501020	0.136403
3	input GFP	0.057	13692.6	779.299	20128188	17854712
3	input MPZ	0.057	7781.11	442.852	11438228	9164752
3	beads GFP	0.057	1674.29	95.29	2461208	187732
3	beads MPZ	0.057	4948.22	281.622	7273884	5000408
	background	0.057	1546.58	88.022	2273476
calculation of dilution factor:	ul incubated with beads	ul mixed with sample buffer (40 ul total)	ul loaded onto gel	dilution factor
input	250	30	25	0.1
calculation of dilution factor:	ul of sample buffer incubated with beads for elution	ul of sample buffer recovered after removal of beads	ul loaded onto gel
beads	50	35	20	0.4

## Sheet: 2018-04-13 rep 2
sample	area	mean	int den	raw int den	background subtracted		sample	input (*dilution factor)	beads (*dilution factor)	fraction IP'ed
input - GFP	0.078	63.517	4.973	1790411	1469241		GFP	14692410	283330	0.0192841
input - INS	0.078	54.849	4.295	1546079	1713573		INS	17135730	560485	0.0327086
input - RHO	0.078	57.206	4.479	1612524	1647128		RHO	16471280	882190	0.0535593
background	0.078	115.64	9.055	3259652
beads - GFP	0.038	134.022	5.066	1823773	113332
beads - INS	0.038	125.875	4.758	1712911	224194
beads - RHO	0.038	116.419	4.401	1584229	352876
background	0.038	142.35	5.381	1937105
calculation of dilution factor:	ul incubated with beads	ul mixed with sample buffer (40 ul total)	ul loaded onto gel	dilution factor
input	250	30	25	0.1
calculation of dilution factor:	ul of sample buffer incubated with beads for elution	ul of sample buffer recovered after removal of beads	ul loaded onto gel
beads	50	35	20	0.4

## Sheet: 2018-09-20 rep 1
sample	area	mean	int den	raw int den	background subtracted		sample	input (*dilution factor)	beads (*dilution factor)	fraction IP'ed
input - GFP	22176	44.075	977412	977412	1525086		GFP	15250860	-86145	-0.00564853
input - INS	22176	38.216	847481	847481	1655017		INS	16550170	209292	0.0126459
input - RHO	22176	37.461	830730	830730	1671768		RHO	16717680	912648	0.0545918
background	22176	112.847	2502498	2502498
beads - GFP	15008	119.987	1800758	1800758	-34458
beads - INS	15008	112.112	1682583	1682583	83717
beads - RHO	15008	93.366	1401241	1401241	365059
background	15008	117.691	1766300	1766300
calculation of dilution factor:	ul incubated with beads	ul mixed with sample buffer (40 ul total)	ul loaded onto gel	dilution factor
input	250	30	25	0.1
calculation of dilution factor:	ul of sample buffer incubated with beads for elution	ul of sample buffer recovered after removal of beads	ul loaded onto gel
beads	50	35	20	0.4

## Sheet: compiled
	Rep 1		Rep 2		Rep 3		Rep 1		Rep 2		fraction IP'ed
sample	input (*dilution factor)	beads (*diluton factor)	input (*dilution factor)	beads (*diluton factor)	input (*dilution factor)	beads (*diluton factor)					Rep 1	Rep 2	Rep 3	Rep 1	Rep 2	average	SEM	% IP'ed	SEM
GFP	13548910	467290	242658380	73040	178547120	469330	14692410	283330	15250860	-86145	0.0344891	0.000300999	0.00262861	0.0192841	-0.00564853	0.0102109	0.00854271	1.02109	0.854271
MPZ	13824070	1.45333e+06	191711370	11158310	91647520	12501020					0.105131	0.0582037	0.136403			0.0999125	0.0227245	9.99125	2.27245
INS							17135730	560485	16550170	209292				0.0327086	0.0126459	0.0226772	0.0100313	2.26772	1.00313
RHO							16471280	882190	16717680	912648				0.0535593	0.0545918	0.0540755	0.000516235	5.40755	0.0516235
GFP	0.0344891	0.000300999	0.00262861	0.0192841	-0.00564853
MPZ	0.105131	0.0582037	0.136403
INS				0.0327086	0.0126459
RHO				0.0535593	0.0545918

## Sheet: unpaired t tests
Table Analyzed	Data 1	Data 1	Data 1
Column B	MPZ	INS	RHO
vs.	vs.	vs.	vs.
Column A	GFP	GFP	GFP
Unpaired t test
P value	0.0035	0.3945	0.0161
P value summary	**	ns	*
Significantly different? (P < 0.05)	Yes	No	Yes
One- or two-tailed P value?	Two-tailed	Two-tailed	Two-tailed
t, df	t=4.655 df=6	t=0.9312 df=5	t=3.568 df=5
How big is the difference?
Mean ± SEM of column A	0.01021 ± 0.007345, n=5	0.01021 ± 0.007345, n=5	0.01021 ± 0.007345, n=5
Mean ± SEM of column B	0.09991 ± 0.02272, n=3	0.02268 ± 0.01003, n=2	0.05408 ± 0.0005162, n=2
Difference between means	0.08970 ± 0.01927	0.01247 ± 0.01339	0.04386 ± 0.01229
95% confidence interval	0.04255 to 0.1369	-0.02195 to 0.04688	0.01226 to 0.07547
R squared	0.7832	0.1478	0.718
F test to compare variances
F,DFn, Dfd	5.743, 2, 4
P value	0.1334
P value summary	ns
Significantly different? (P < 0.05)	No
