# Supplementary material for: Misfolded proteins bind and activate death receptor 5 to trigger apoptosis during unresolved endoplasmic reticulum stress
Source: eLife journal article supplement (doi:10.7554/elife.52291), 2020-01-06
Supplement: fig1-data3 [file Figure 1 - Source Data 1 Annexin V for MPZ-GFP.xlsx]

## Sheet: 2018-01-17 MPZ
Depth	Name	parameter	Statistic	#Cells	Construct	siRNA		parameter	Statistic	#Cells	Construct	siRNA		Construct	siRNA	Annexin V-	Annexin V+
	Specimen_002_D1_D01_001.fcs			50000	empty	scrambled		AnnexinV-	85.7	34836	empty	scrambled		empty	scrambled	85.7	14.3
>	Specimen_002_D1_D01_001.fcs/all cells		91.3	45630	empty	scrambled		AnnexinV-	51.9	19322	empty + Tg	scrambled		empty + Tg	scrambled	51.9	48.1
> >	Specimen_002_D1_D01_001.fcs/all cells/Single Cells		89.1	40641	empty	scrambled		AnnexinV-	58.2	18799	MPZ-GFP	scrambled		MPZ-GFP	scrambled	58.2	41.8
> > >	Specimen_002_D1_D01_001.fcs/all cells/Single Cells/AnnexinV+	AnnexinV+	14.3	5805	empty	scrambled		AnnexinV-	86.8	30960	cyto-GFP	scrambled		MPZ-GFP	DR5	89.6	10.4
> > >	Specimen_002_D1_D01_001.fcs/all cells/Single Cells/AnnexinV-	AnnexinV-	85.7	34836	empty	scrambled		AnnexinV-	89.6	32839	MPZ-GFP	DR5		MPZ-GFP	TRAIL	79.2	20.8
> > >	Specimen_002_D1_D01_001.fcs/all cells/Single Cells/GFP+	GFP+	0.022	9	empty	scrambled		AnnexinV-	79.2	28571	MPZ-GFP	TRAIL		cyto-GFP	scrambled	86.8	13.2
> > >	Specimen_002_D1_D01_001.fcs/all cells/Single Cells/GFP-	GFP-	100	40632	empty	scrambled		AnnexinV+	14.3	5805	empty	scrambled
> > >	Specimen_002_D1_D01_001.fcs/all cells/Single Cells/Q1: APC-A- , DAPI-A+	Q1: APC-A- , DAPI-A+	1.66	676	empty	scrambled		AnnexinV+	48.1	17904	empty + Tg	scrambled
> > >	Specimen_002_D1_D01_001.fcs/all cells/Single Cells/Q2: APC-A+ , DAPI-A+	Q2: APC-A+ , DAPI-A+	10.5	4247	empty	scrambled		AnnexinV+	41.8	13528	MPZ-GFP	scrambled
> > >	Specimen_002_D1_D01_001.fcs/all cells/Single Cells/Q3: APC-A+ , DAPI-A-	Q3: APC-A+ , DAPI-A-	2.33	947	empty	scrambled		AnnexinV+	13.2	4700	cyto-GFP	scrambled
> > >	Specimen_002_D1_D01_001.fcs/all cells/Single Cells/Q4: APC-A- , DAPI-A-	Q4: APC-A- , DAPI-A-	85.6	34771	empty	scrambled		AnnexinV+	10.4	3792	MPZ-GFP	DR5
> > >	Specimen_002_D1_D01_001.fcs/all cells/Single Cells/SytoxBlue+	SytoxBlue+	11.8	4795	empty	scrambled		AnnexinV+	20.8	7516	MPZ-GFP	TRAIL
> > >	Specimen_002_D1_D01_001.fcs/all cells/Single Cells/SytoxBlue-	SytoxBlue-	88.2	35846	empty	scrambled		FITC-A-	99.8	3368	empty	scrambled
>	Specimen_002_D1_D01_001.fcs/dead cells		7.3	3652	empty	scrambled		FITC-A-	100	12213	empty + Tg	scrambled
> >	Specimen_002_D1_D01_001.fcs/dead cells/Single Cells		92.4	3375	empty	scrambled		FITC-A-	62.4	5878	MPZ-GFP	scrambled
> > >	Specimen_002_D1_D01_001.fcs/dead cells/Single Cells/FITC-A+	FITC-A+	0.21	7	empty	scrambled		FITC-A-	55.9	1902	cyto-GFP	scrambled
> > >	Specimen_002_D1_D01_001.fcs/dead cells/Single Cells/FITC-A-	FITC-A-	99.8	3368	empty	scrambled		FITC-A-	56.6	1610	MPZ-GFP	DR5
	Specimen_002_D2_D02_002.fcs			50000	empty + Tg	scrambled		FITC-A-	56.6	2716	MPZ-GFP	TRAIL
>	Specimen_002_D2_D02_002.fcs/all cells		91	45482	empty + Tg	scrambled		FITC-A+	0.21	7	empty	scrambled
> >	Specimen_002_D2_D02_002.fcs/all cells/Single Cells		81.8	37226	empty + Tg	scrambled		FITC-A+	0.016	2	empty + Tg	scrambled
> > >	Specimen_002_D2_D02_002.fcs/all cells/Single Cells/AnnexinV+	AnnexinV+	48.1	17904	empty + Tg	scrambled		FITC-A+	37.6	3549	MPZ-GFP	scrambled
> > >	Specimen_002_D2_D02_002.fcs/all cells/Single Cells/AnnexinV-	AnnexinV-	51.9	19322	empty + Tg	scrambled		FITC-A+	44.1	1500	cyto-GFP	scrambled
> > >	Specimen_002_D2_D02_002.fcs/all cells/Single Cells/GFP+	GFP+	0.011	4	empty + Tg	scrambled		FITC-A+	43.4	1235	MPZ-GFP	DR5
> > >	Specimen_002_D2_D02_002.fcs/all cells/Single Cells/GFP-	GFP-	100	37222	empty + Tg	scrambled		FITC-A+	43.4	2084	MPZ-GFP	TRAIL
> > >	Specimen_002_D2_D02_002.fcs/all cells/Single Cells/Q1: APC-A- , DAPI-A+	Q1: APC-A- , DAPI-A+	10.8	4023	empty + Tg	scrambled		GFP-	100	40632	empty	scrambled
> > >	Specimen_002_D2_D02_002.fcs/all cells/Single Cells/Q2: APC-A+ , DAPI-A+	Q2: APC-A+ , DAPI-A+	31.2	11596	empty + Tg	scrambled		GFP-	100	37222	empty + Tg	scrambled
> > >	Specimen_002_D2_D02_002.fcs/all cells/Single Cells/Q3: APC-A+ , DAPI-A-	Q3: APC-A+ , DAPI-A-	13.1	4862	empty + Tg	scrambled		GFP-	39.9	12887	MPZ-GFP	scrambled
> > >	Specimen_002_D2_D02_002.fcs/all cells/Single Cells/Q4: APC-A- , DAPI-A-	Q4: APC-A- , DAPI-A-	45	16745	empty + Tg	scrambled		GFP-	56.1	19993	cyto-GFP	scrambled
> > >	Specimen_002_D2_D02_002.fcs/all cells/Single Cells/SytoxBlue+	SytoxBlue+	40.3	14995	empty + Tg	scrambled		GFP-	59.2	21680	MPZ-GFP	DR5
> > >	Specimen_002_D2_D02_002.fcs/all cells/Single Cells/SytoxBlue-	SytoxBlue-	59.7	22231	empty + Tg	scrambled		GFP-	52.1	18787	MPZ-GFP	TRAIL
>	Specimen_002_D2_D02_002.fcs/dead cells		26.5	13259	empty + Tg	scrambled		GFP+	0.022	9	empty	scrambled
> >	Specimen_002_D2_D02_002.fcs/dead cells/Single Cells		92.1	12215	empty + Tg	scrambled		GFP+	0.011	4	empty + Tg	scrambled
> > >	Specimen_002_D2_D02_002.fcs/dead cells/Single Cells/FITC-A+	FITC-A+	0.016	2	empty + Tg	scrambled		GFP+	60.1	19440	MPZ-GFP	scrambled
> > >	Specimen_002_D2_D02_002.fcs/dead cells/Single Cells/FITC-A-	FITC-A-	100	12213	empty + Tg	scrambled		GFP+	43.9	15667	cyto-GFP	scrambled
	Specimen_002_D3_D03_003.fcs			46300	MPZ-GFP	scrambled		GFP+	40.8	14951	MPZ-GFP	DR5
>	Specimen_002_D3_D03_003.fcs/all cells		83.5	38677	MPZ-GFP	scrambled		GFP+	47.9	17300	MPZ-GFP	TRAIL
> >	Specimen_002_D3_D03_003.fcs/all cells/Single Cells		83.6	32327	MPZ-GFP	scrambled		Q1: APC-A- , DAPI-A+	1.66	676	empty	scrambled
> > >	Specimen_002_D3_D03_003.fcs/all cells/Single Cells/AnnexinV+	AnnexinV+	41.8	13528	MPZ-GFP	scrambled		Q1: APC-A- , DAPI-A+	10.8	4023	empty + Tg	scrambled
> > >	Specimen_002_D3_D03_003.fcs/all cells/Single Cells/AnnexinV-	AnnexinV-	58.2	18799	MPZ-GFP	scrambled		Q1: APC-A- , DAPI-A+	10.7	3467	MPZ-GFP	scrambled
> > >	Specimen_002_D3_D03_003.fcs/all cells/Single Cells/GFP+	GFP+	60.1	19440	MPZ-GFP	scrambled		Q1: APC-A- , DAPI-A+	1.36	484	cyto-GFP	scrambled
> > >	Specimen_002_D3_D03_003.fcs/all cells/Single Cells/GFP-	GFP-	39.9	12887	MPZ-GFP	scrambled		Q1: APC-A- , DAPI-A+	1.26	463	MPZ-GFP	DR5
> > >	Specimen_002_D3_D03_003.fcs/all cells/Single Cells/Q1: APC-A- , DAPI-A+	Q1: APC-A- , DAPI-A+	10.7	3467	MPZ-GFP	scrambled		Q1: APC-A- , DAPI-A+	2.56	924	MPZ-GFP	TRAIL
> > >	Specimen_002_D3_D03_003.fcs/all cells/Single Cells/Q2: APC-A+ , DAPI-A+	Q2: APC-A+ , DAPI-A+	31.7	10261	MPZ-GFP	scrambled		Q2: APC-A+ , DAPI-A+	10.5	4247	empty	scrambled
> > >	Specimen_002_D3_D03_003.fcs/all cells/Single Cells/Q3: APC-A+ , DAPI-A-	Q3: APC-A+ , DAPI-A-	8.04	2598	MPZ-GFP	scrambled		Q2: APC-A+ , DAPI-A+	31.2	11596	empty + Tg	scrambled
> > >	Specimen_002_D3_D03_003.fcs/all cells/Single Cells/Q4: APC-A- , DAPI-A-	Q4: APC-A- , DAPI-A-	49.5	16001	MPZ-GFP	scrambled		Q2: APC-A+ , DAPI-A+	31.7	10261	MPZ-GFP	scrambled
> > >	Specimen_002_D3_D03_003.fcs/all cells/Single Cells/SytoxBlue+	SytoxBlue+	40	12945	MPZ-GFP	scrambled		Q2: APC-A+ , DAPI-A+	10.4	3704	cyto-GFP	scrambled
> > >	Specimen_002_D3_D03_003.fcs/all cells/Single Cells/SytoxBlue-	SytoxBlue-	60	19382	MPZ-GFP	scrambled		Q2: APC-A+ , DAPI-A+	8.07	2957	MPZ-GFP	DR5
>	Specimen_002_D3_D03_003.fcs/dead cells		22	10182	MPZ-GFP	scrambled		Q2: APC-A+ , DAPI-A+	16.8	6066	MPZ-GFP	TRAIL
> >	Specimen_002_D3_D03_003.fcs/dead cells/Single Cells		92.6	9427	MPZ-GFP	scrambled		Q3: APC-A+ , DAPI-A-	2.33	947	empty	scrambled
> > >	Specimen_002_D3_D03_003.fcs/dead cells/Single Cells/FITC-A+	FITC-A+	37.6	3549	MPZ-GFP	scrambled		Q3: APC-A+ , DAPI-A-	13.1	4862	empty + Tg	scrambled
> > >	Specimen_002_D3_D03_003.fcs/dead cells/Single Cells/FITC-A-	FITC-A-	62.4	5878	MPZ-GFP	scrambled		Q3: APC-A+ , DAPI-A-	8.04	2598	MPZ-GFP	scrambled
	Specimen_002_D4_D04_004.fcs			50000	cyto-GFP	scrambled		Q3: APC-A+ , DAPI-A-	1.74	620	cyto-GFP	scrambled
>	Specimen_002_D4_D04_004.fcs/all cells		89.8	44914	cyto-GFP	scrambled		Q3: APC-A+ , DAPI-A-	1.36	498	MPZ-GFP	DR5
> >	Specimen_002_D4_D04_004.fcs/all cells/Single Cells		79.4	35660	cyto-GFP	scrambled		Q3: APC-A+ , DAPI-A-	2.29	828	MPZ-GFP	TRAIL
> > >	Specimen_002_D4_D04_004.fcs/all cells/Single Cells/AnnexinV+	AnnexinV+	13.2	4700	cyto-GFP	scrambled		Q4: APC-A- , DAPI-A-	85.6	34771	empty	scrambled
> > >	Specimen_002_D4_D04_004.fcs/all cells/Single Cells/AnnexinV-	AnnexinV-	86.8	30960	cyto-GFP	scrambled		Q4: APC-A- , DAPI-A-	45	16745	empty + Tg	scrambled
> > >	Specimen_002_D4_D04_004.fcs/all cells/Single Cells/GFP+	GFP+	43.9	15667	cyto-GFP	scrambled		Q4: APC-A- , DAPI-A-	49.5	16001	MPZ-GFP	scrambled
> > >	Specimen_002_D4_D04_004.fcs/all cells/Single Cells/GFP-	GFP-	56.1	19993	cyto-GFP	scrambled		Q4: APC-A- , DAPI-A-	86.5	30852	cyto-GFP	scrambled
> > >	Specimen_002_D4_D04_004.fcs/all cells/Single Cells/Q1: APC-A- , DAPI-A+	Q1: APC-A- , DAPI-A+	1.36	484	cyto-GFP	scrambled		Q4: APC-A- , DAPI-A-	89.3	32713	MPZ-GFP	DR5
> > >	Specimen_002_D4_D04_004.fcs/all cells/Single Cells/Q2: APC-A+ , DAPI-A+	Q2: APC-A+ , DAPI-A+	10.4	3704	cyto-GFP	scrambled		Q4: APC-A- , DAPI-A-	78.3	28269	MPZ-GFP	TRAIL
> > >	Specimen_002_D4_D04_004.fcs/all cells/Single Cells/Q3: APC-A+ , DAPI-A-	Q3: APC-A+ , DAPI-A-	1.74	620	cyto-GFP	scrambled		SytoxBlue-	88.2	35846	empty	scrambled
> > >	Specimen_002_D4_D04_004.fcs/all cells/Single Cells/Q4: APC-A- , DAPI-A-	Q4: APC-A- , DAPI-A-	86.5	30852	cyto-GFP	scrambled		SytoxBlue-	59.7	22231	empty + Tg	scrambled
> > >	Specimen_002_D4_D04_004.fcs/all cells/Single Cells/SytoxBlue+	SytoxBlue+	11.3	4044	cyto-GFP	scrambled		SytoxBlue-	60	19382	MPZ-GFP	scrambled
> > >	Specimen_002_D4_D04_004.fcs/all cells/Single Cells/SytoxBlue-	SytoxBlue-	88.7	31616	cyto-GFP	scrambled		SytoxBlue-	88.7	31616	cyto-GFP	scrambled
>	Specimen_002_D4_D04_004.fcs/dead cells		7.3	3650	cyto-GFP	scrambled		SytoxBlue-	90.9	33296	MPZ-GFP	DR5
> >	Specimen_002_D4_D04_004.fcs/dead cells/Single Cells		93.2	3402	cyto-GFP	scrambled		SytoxBlue-	81.1	29264	MPZ-GFP	TRAIL
> > >	Specimen_002_D4_D04_004.fcs/dead cells/Single Cells/FITC-A+	FITC-A+	44.1	1500	cyto-GFP	scrambled		SytoxBlue+	11.8	4795	empty	scrambled
> > >	Specimen_002_D4_D04_004.fcs/dead cells/Single Cells/FITC-A-	FITC-A-	55.9	1902	cyto-GFP	scrambled		SytoxBlue+	40.3	14995	empty + Tg	scrambled
	Specimen_002_D5_D05_005.fcs			50000	MPZ-GFP	DR5		SytoxBlue+	40	12945	MPZ-GFP	scrambled
>	Specimen_002_D5_D05_005.fcs/all cells		88.3	44160	MPZ-GFP	DR5		SytoxBlue+	11.3	4044	cyto-GFP	scrambled
> >	Specimen_002_D5_D05_005.fcs/all cells/Single Cells		83	36631	MPZ-GFP	DR5		SytoxBlue+	9.1	3335	MPZ-GFP	DR5
> > >	Specimen_002_D5_D05_005.fcs/all cells/Single Cells/AnnexinV+	AnnexinV+	10.4	3792	MPZ-GFP	DR5		SytoxBlue+	18.9	6823	MPZ-GFP	TRAIL
> > >	Specimen_002_D5_D05_005.fcs/all cells/Single Cells/AnnexinV-	AnnexinV-	89.6	32839	MPZ-GFP	DR5
> > >	Specimen_002_D5_D05_005.fcs/all cells/Single Cells/GFP+	GFP+	40.8	14951	MPZ-GFP	DR5
> > >	Specimen_002_D5_D05_005.fcs/all cells/Single Cells/GFP-	GFP-	59.2	21680	MPZ-GFP	DR5
> > >	Specimen_002_D5_D05_005.fcs/all cells/Single Cells/Q1: APC-A- , DAPI-A+	Q1: APC-A- , DAPI-A+	1.26	463	MPZ-GFP	DR5
> > >	Specimen_002_D5_D05_005.fcs/all cells/Single Cells/Q2: APC-A+ , DAPI-A+	Q2: APC-A+ , DAPI-A+	8.07	2957	MPZ-GFP	DR5
> > >	Specimen_002_D5_D05_005.fcs/all cells/Single Cells/Q3: APC-A+ , DAPI-A-	Q3: APC-A+ , DAPI-A-	1.36	498	MPZ-GFP	DR5
> > >	Specimen_002_D5_D05_005.fcs/all cells/Single Cells/Q4: APC-A- , DAPI-A-	Q4: APC-A- , DAPI-A-	89.3	32713	MPZ-GFP	DR5
> > >	Specimen_002_D5_D05_005.fcs/all cells/Single Cells/SytoxBlue+	SytoxBlue+	9.1	3335	MPZ-GFP	DR5
> > >	Specimen_002_D5_D05_005.fcs/all cells/Single Cells/SytoxBlue-	SytoxBlue-	90.9	33296	MPZ-GFP	DR5
>	Specimen_002_D5_D05_005.fcs/dead cells		6.03	3016	MPZ-GFP	DR5
> >	Specimen_002_D5_D05_005.fcs/dead cells/Single Cells		94.3	2845	MPZ-GFP	DR5
> > >	Specimen_002_D5_D05_005.fcs/dead cells/Single Cells/FITC-A+	FITC-A+	43.4	1235	MPZ-GFP	DR5
> > >	Specimen_002_D5_D05_005.fcs/dead cells/Single Cells/FITC-A-	FITC-A-	56.6	1610	MPZ-GFP	DR5
	Specimen_002_D6_D06_006.fcs			50000	MPZ-GFP	TRAIL
>	Specimen_002_D6_D06_006.fcs/all cells		86.6	43280	MPZ-GFP	TRAIL
> >	Specimen_002_D6_D06_006.fcs/all cells/Single Cells		83.4	36087	MPZ-GFP	TRAIL
> > >	Specimen_002_D6_D06_006.fcs/all cells/Single Cells/AnnexinV+	AnnexinV+	20.8	7516	MPZ-GFP	TRAIL
> > >	Specimen_002_D6_D06_006.fcs/all cells/Single Cells/AnnexinV-	AnnexinV-	79.2	28571	MPZ-GFP	TRAIL
> > >	Specimen_002_D6_D06_006.fcs/all cells/Single Cells/GFP+	GFP+	47.9	17300	MPZ-GFP	TRAIL
> > >	Specimen_002_D6_D06_006.fcs/all cells/Single Cells/GFP-	GFP-	52.1	18787	MPZ-GFP	TRAIL
> > >	Specimen_002_D6_D06_006.fcs/all cells/Single Cells/Q1: APC-A- , DAPI-A+	Q1: APC-A- , DAPI-A+	2.56	924	MPZ-GFP	TRAIL
> > >	Specimen_002_D6_D06_006.fcs/all cells/Single Cells/Q2: APC-A+ , DAPI-A+	Q2: APC-A+ , DAPI-A+	16.8	6066	MPZ-GFP	TRAIL
> > >	Specimen_002_D6_D06_006.fcs/all cells/Single Cells/Q3: APC-A+ , DAPI-A-	Q3: APC-A+ , DAPI-A-	2.29	828	MPZ-GFP	TRAIL
> > >	Specimen_002_D6_D06_006.fcs/all cells/Single Cells/Q4: APC-A- , DAPI-A-	Q4: APC-A- , DAPI-A-	78.3	28269	MPZ-GFP	TRAIL
> > >	Specimen_002_D6_D06_006.fcs/all cells/Single Cells/SytoxBlue+	SytoxBlue+	18.9	6823	MPZ-GFP	TRAIL
> > >	Specimen_002_D6_D06_006.fcs/all cells/Single Cells/SytoxBlue-	SytoxBlue-	81.1	29264	MPZ-GFP	TRAIL
>	Specimen_002_D6_D06_006.fcs/dead cells		10.4	5182	MPZ-GFP	TRAIL
> >	Specimen_002_D6_D06_006.fcs/dead cells/Single Cells		92.6	4800	MPZ-GFP	TRAIL
> > >	Specimen_002_D6_D06_006.fcs/dead cells/Single Cells/FITC-A+	FITC-A+	43.4	2084	MPZ-GFP	TRAIL
> > >	Specimen_002_D6_D06_006.fcs/dead cells/Single Cells/FITC-A-	FITC-A-	56.6	2716	MPZ-GFP	TRAIL

## Sheet: 2018-06-21
Depth	Name	Parameter	Statistic	#Cells	construct	siRNA	stain			Parameter	Statistic	#Cells	construct	siRNA	stain
	Specimen_001_A1_A01_001.fcs			14145	empty	non-targeting	AnnexinV-647			AnnexinV-	87.9	8954	cytoGFP	non-targeting	AnnexinV-647
>	Specimen_001_A1_A01_001.fcs/all cells		78.7	11139	empty	non-targeting	AnnexinV-647			AnnexinV-	86	9627	cytoGFP	non-targeting	AnnexinV-647
> >	Specimen_001_A1_A01_001.fcs/all cells/Single Cells		77.2	8602	empty	non-targeting	AnnexinV-647			AnnexinV-	100	8510	cytoGFP	non-targeting	AnnexinV-647
> > >	Specimen_001_A1_A01_001.fcs/all cells/Single Cells/APC-A+	AnnexinV+	4.05	348	empty	non-targeting	AnnexinV-647			AnnexinV+	12.1	1237	cytoGFP	non-targeting	AnnexinV-647
> > >	Specimen_001_A1_A01_001.fcs/all cells/Single Cells/APC-A-	AnnexinV-	96	8254	empty	non-targeting	AnnexinV-647			AnnexinV+	14	1566	cytoGFP	non-targeting	AnnexinV-647
> > >	Specimen_001_A1_A01_001.fcs/all cells/Single Cells/FITC-A+	GFP+	0	0	empty	non-targeting	AnnexinV-647			AnnexinV+	0.012	1	cytoGFP	non-targeting	AnnexinV-647
> > >	Specimen_001_A1_A01_001.fcs/all cells/Single Cells/FITC-A-	GFP-	100	8602	empty	non-targeting	AnnexinV-647			GFP-	42	4278	cytoGFP	non-targeting	unstained
	Specimen_001_A2_A02_002.fcs			23835	cytoGFP	non-targeting	AnnexinV-647			GFP-	42.5	4761	cytoGFP	non-targeting	unstained
>	Specimen_001_A2_A02_002.fcs/all cells		56.8	13549	cytoGFP	non-targeting	AnnexinV-647			GFP-	41.6	3537	cytoGFP	non-targeting	unstained
> >	Specimen_001_A2_A02_002.fcs/all cells/Single Cells		75.2	10191	cytoGFP	non-targeting	AnnexinV-647			GFP+	58	5913	cytoGFP	non-targeting	AnnexinV-647
> > >	Specimen_001_A2_A02_002.fcs/all cells/Single Cells/APC-A+	AnnexinV+	12.1	1237	cytoGFP	non-targeting	AnnexinV-647			GFP+	57.5	6432	cytoGFP	non-targeting	AnnexinV-647
> > >	Specimen_001_A2_A02_002.fcs/all cells/Single Cells/APC-A-	AnnexinV-	87.9	8954	cytoGFP	non-targeting	AnnexinV-647			GFP+	58.4	4974	cytoGFP	non-targeting	AnnexinV-647
> > >	Specimen_001_A2_A02_002.fcs/all cells/Single Cells/FITC-A+	GFP+	58	5913	cytoGFP	non-targeting	AnnexinV-647			AnnexinV-	96	8254	empty	non-targeting	AnnexinV-647
> > >	Specimen_001_A2_A02_002.fcs/all cells/Single Cells/FITC-A-	GFP-	42	4278	cytoGFP	non-targeting	AnnexinV-647			AnnexinV-	96	10352	empty	non-targeting	AnnexinV-647
	Specimen_001_A3_A03_003.fcs			21278	rhodopsin-GFP	non-targeting	AnnexinV-647			AnnexinV-	100	11026	empty	non-targeting	AnnexinV-647
>	Specimen_001_A3_A03_003.fcs/all cells		41.1	8755	rhodopsin-GFP	non-targeting	AnnexinV-647			AnnexinV+	4.05	348	empty	non-targeting	AnnexinV-647
> >	Specimen_001_A3_A03_003.fcs/all cells/Single Cells		68	5957	rhodopsin-GFP	non-targeting	AnnexinV-647			AnnexinV+	4.01	433	empty	non-targeting	AnnexinV-647
> > >	Specimen_001_A3_A03_003.fcs/all cells/Single Cells/APC-A+	AnnexinV+	30.4	1808	rhodopsin-GFP	non-targeting	AnnexinV-647			AnnexinV+	0.00907	1	empty	non-targeting	AnnexinV-647
> > >	Specimen_001_A3_A03_003.fcs/all cells/Single Cells/APC-A-	AnnexinV-	69.6	4149	rhodopsin-GFP	non-targeting	AnnexinV-647			GFP-	100	8602	empty	non-targeting	unstained
> > >	Specimen_001_A3_A03_003.fcs/all cells/Single Cells/FITC-A+	GFP+	74.6	4445	rhodopsin-GFP	non-targeting	AnnexinV-647			GFP-	99.5	10736	empty	non-targeting	unstained
> > >	Specimen_001_A3_A03_003.fcs/all cells/Single Cells/FITC-A-	GFP-	25.4	1512	rhodopsin-GFP	non-targeting	AnnexinV-647			GFP-	99.9	11015	empty	non-targeting	unstained
	Specimen_001_B1_B01_004.fcs			19708	empty	non-targeting	AnnexinV-647			GFP+	0	0	empty	non-targeting	AnnexinV-647
>	Specimen_001_B1_B01_004.fcs/all cells		73.7	14519	empty	non-targeting	AnnexinV-647			GFP+	0.45	49	empty	non-targeting	AnnexinV-647
> >	Specimen_001_B1_B01_004.fcs/all cells/Single Cells		74.3	10785	empty	non-targeting	AnnexinV-647			GFP+	0.11	12	empty	non-targeting	AnnexinV-647
> > >	Specimen_001_B1_B01_004.fcs/all cells/Single Cells/APC-A+	AnnexinV+	4.01	433	empty	non-targeting	AnnexinV-647			AnnexinV-	67.8	8082	empty + Tg	non-targeting	AnnexinV-647
> > >	Specimen_001_B1_B01_004.fcs/all cells/Single Cells/APC-A-	AnnexinV-	96	10352	empty	non-targeting	AnnexinV-647			AnnexinV-	74.3	8465	empty + Tg	non-targeting	AnnexinV-647
> > >	Specimen_001_B1_B01_004.fcs/all cells/Single Cells/FITC-A+	GFP+	0.45	49	empty	non-targeting	AnnexinV-647			AnnexinV+	32.2	3847	empty + Tg	non-targeting	AnnexinV-647
> > >	Specimen_001_B1_B01_004.fcs/all cells/Single Cells/FITC-A-	GFP-	99.5	10736	empty	non-targeting	AnnexinV-647			AnnexinV+	25.7	2928	empty + Tg	non-targeting	AnnexinV-647
	Specimen_001_B2_B02_005.fcs			26274	cytoGFP	non-targeting	AnnexinV-647			GFP-	99.8	11903	empty + Tg	non-targeting	unstained
>	Specimen_001_B2_B02_005.fcs/all cells		57.5	15112	cytoGFP	non-targeting	AnnexinV-647			GFP-	99.8	11373	empty + Tg	non-targeting	unstained
> >	Specimen_001_B2_B02_005.fcs/all cells/Single Cells		74.1	11193	cytoGFP	non-targeting	AnnexinV-647			GFP+	0.22	26	empty + Tg	non-targeting	AnnexinV-647
> > >	Specimen_001_B2_B02_005.fcs/all cells/Single Cells/APC-A+	AnnexinV+	14	1566	cytoGFP	non-targeting	AnnexinV-647			GFP+	0.18	20	empty + Tg	non-targeting	AnnexinV-647
> > >	Specimen_001_B2_B02_005.fcs/all cells/Single Cells/APC-A-	AnnexinV-	86	9627	cytoGFP	non-targeting	AnnexinV-647			AnnexinV-	74.2	3638	MPZ-GFP	non-targeting	AnnexinV-647
> > >	Specimen_001_B2_B02_005.fcs/all cells/Single Cells/FITC-A+	GFP+	57.5	6432	cytoGFP	non-targeting	AnnexinV-647			AnnexinV+	25.8	1266	MPZ-GFP	non-targeting	AnnexinV-647
> > >	Specimen_001_B2_B02_005.fcs/all cells/Single Cells/FITC-A-	GFP-	42.5	4761	cytoGFP	non-targeting	AnnexinV-647			GFP-	29	1421	MPZ-GFP	non-targeting	unstained
	Specimen_001_B3_B03_006.fcs			16097	rhodopsin-GFP	non-targeting	AnnexinV-647			GFP+	71	3483	MPZ-GFP	non-targeting	AnnexinV-647
>	Specimen_001_B3_B03_006.fcs/all cells		40.9	6587	rhodopsin-GFP	non-targeting	AnnexinV-647			AnnexinV-	68	3120	MPZ-GFP	non-targeting	AnnexinV-647
> >	Specimen_001_B3_B03_006.fcs/all cells/Single Cells		67.1	4421	rhodopsin-GFP	non-targeting	AnnexinV-647			AnnexinV-	83	4460	MPZ-GFP	DR5	AnnexinV-647
> > >	Specimen_001_B3_B03_006.fcs/all cells/Single Cells/APC-A+	AnnexinV+	29.1	1285	rhodopsin-GFP	non-targeting	AnnexinV-647			AnnexinV-	82.2	2366	MPZ-GFP	DR5	AnnexinV-647
> > >	Specimen_001_B3_B03_006.fcs/all cells/Single Cells/APC-A-	AnnexinV-	70.9	3136	rhodopsin-GFP	non-targeting	AnnexinV-647			AnnexinV+	32	1469	MPZ-GFP	non-targeting	AnnexinV-647
> > >	Specimen_001_B3_B03_006.fcs/all cells/Single Cells/FITC-A+	GFP+	72.2	3193	rhodopsin-GFP	non-targeting	AnnexinV-647			AnnexinV+	17	911	MPZ-GFP	DR5	AnnexinV-647
> > >	Specimen_001_B3_B03_006.fcs/all cells/Single Cells/FITC-A-	GFP-	27.8	1228	rhodopsin-GFP	non-targeting	AnnexinV-647			AnnexinV+	17.8	512	MPZ-GFP	DR5	AnnexinV-647
	Specimen_001_C1_C01_007.fcs			19968	empty	non-targeting	unstained			GFP-	26.4	1211	MPZ-GFP	non-targeting	unstained
>	Specimen_001_C1_C01_007.fcs/all cells		73.8	14736	empty	non-targeting	unstained			GFP-	26.4	1417	MPZ-GFP	DR5	unstained
> >	Specimen_001_C1_C01_007.fcs/all cells/Single Cells		74.8	11027	empty	non-targeting	unstained			GFP-	26.7	769	MPZ-GFP	DR5	unstained
> > >	Specimen_001_C1_C01_007.fcs/all cells/Single Cells/APC-A+	AnnexinV+	0.00907	1	empty	non-targeting	unstained			GFP+	73.6	3378	MPZ-GFP	non-targeting	AnnexinV-647
> > >	Specimen_001_C1_C01_007.fcs/all cells/Single Cells/APC-A-	AnnexinV-	100	11026	empty	non-targeting	unstained			GFP+	73.6	3954	MPZ-GFP	DR5	AnnexinV-647
> > >	Specimen_001_C1_C01_007.fcs/all cells/Single Cells/FITC-A+	GFP+	0.11	12	empty	non-targeting	unstained			GFP+	73.3	2109	MPZ-GFP	DR5	AnnexinV-647
> > >	Specimen_001_C1_C01_007.fcs/all cells/Single Cells/FITC-A-	GFP-	99.9	11015	empty	non-targeting	unstained			AnnexinV-	65.3	2772	proinsulin-GFP	non-targeting	AnnexinV-647
	Specimen_001_C2_C02_008.fcs			20526	cytoGFP	non-targeting	unstained			AnnexinV-	60.6	3209	proinsulin-GFP	non-targeting	AnnexinV-647
>	Specimen_001_C2_C02_008.fcs/all cells		57	11700	cytoGFP	non-targeting	unstained			AnnexinV-	82.1	5874	proinsulin-GFP	DR5	AnnexinV-647
> >	Specimen_001_C2_C02_008.fcs/all cells/Single Cells		72.7	8511	cytoGFP	non-targeting	unstained			AnnexinV-	84	4232	proinsulin-GFP	DR5	AnnexinV-647
> > >	Specimen_001_C2_C02_008.fcs/all cells/Single Cells/APC-A+	AnnexinV+	0.012	1	cytoGFP	non-targeting	unstained			AnnexinV+	34.7	1470	proinsulin-GFP	non-targeting	AnnexinV-647
> > >	Specimen_001_C2_C02_008.fcs/all cells/Single Cells/APC-A-	AnnexinV-	100	8510	cytoGFP	non-targeting	unstained			AnnexinV+	39.4	2085	proinsulin-GFP	non-targeting	AnnexinV-647
> > >	Specimen_001_C2_C02_008.fcs/all cells/Single Cells/FITC-A+	GFP+	58.4	4974	cytoGFP	non-targeting	unstained			AnnexinV+	17.9	1278	proinsulin-GFP	DR5	AnnexinV-647
> > >	Specimen_001_C2_C02_008.fcs/all cells/Single Cells/FITC-A-	GFP-	41.6	3537	cytoGFP	non-targeting	unstained			AnnexinV+	16	806	proinsulin-GFP	DR5	AnnexinV-647
	Specimen_001_C3_C03_009.fcs			17058	rhodopsin-GFP	non-targeting	unstained			GFP-	27.2	1152	proinsulin-GFP	non-targeting	unstained
>	Specimen_001_C3_C03_009.fcs/all cells		40.3	6875	rhodopsin-GFP	non-targeting	unstained			GFP-	26.6	1409	proinsulin-GFP	non-targeting	unstained
> >	Specimen_001_C3_C03_009.fcs/all cells/Single Cells		66.5	4569	rhodopsin-GFP	non-targeting	unstained			GFP-	27.5	1964	proinsulin-GFP	DR5	unstained
> > >	Specimen_001_C3_C03_009.fcs/all cells/Single Cells/APC-A+	AnnexinV+	0	0	rhodopsin-GFP	non-targeting	unstained			GFP-	27.2	1368	proinsulin-GFP	DR5	unstained
> > >	Specimen_001_C3_C03_009.fcs/all cells/Single Cells/APC-A-	AnnexinV-	100	4569	rhodopsin-GFP	non-targeting	unstained			GFP+	72.8	3090	proinsulin-GFP	non-targeting	AnnexinV-647
> > >	Specimen_001_C3_C03_009.fcs/all cells/Single Cells/FITC-A+	GFP+	76	3472	rhodopsin-GFP	non-targeting	unstained			GFP+	73.4	3885	proinsulin-GFP	non-targeting	AnnexinV-647
> > >	Specimen_001_C3_C03_009.fcs/all cells/Single Cells/FITC-A-	GFP-	24	1097	rhodopsin-GFP	non-targeting	unstained			GFP+	72.5	5188	proinsulin-GFP	DR5	AnnexinV-647
	Specimen_001_D1_D01_010.fcs			34172	empty + Tg	non-targeting	AnnexinV-647			GFP+	72.8	3670	proinsulin-GFP	DR5	AnnexinV-647
>	Specimen_001_D1_D01_010.fcs/all cells		49.7	16974	empty + Tg	non-targeting	AnnexinV-647			AnnexinV-	69.6	4149	rhodopsin-GFP	non-targeting	AnnexinV-647
> >	Specimen_001_D1_D01_010.fcs/all cells/Single Cells		70.3	11929	empty + Tg	non-targeting	AnnexinV-647			AnnexinV-	70.9	3136	rhodopsin-GFP	non-targeting	AnnexinV-647
> > >	Specimen_001_D1_D01_010.fcs/all cells/Single Cells/APC-A+	AnnexinV+	32.2	3847	empty + Tg	non-targeting	AnnexinV-647			AnnexinV-	100	4569	rhodopsin-GFP	non-targeting	AnnexinV-647
> > >	Specimen_001_D1_D01_010.fcs/all cells/Single Cells/APC-A-	AnnexinV-	67.8	8082	empty + Tg	non-targeting	AnnexinV-647			AnnexinV-	80.6	6101	rhodopsin-GFP	DR5	AnnexinV-647
> > >	Specimen_001_D1_D01_010.fcs/all cells/Single Cells/FITC-A+	GFP+	0.22	26	empty + Tg	non-targeting	AnnexinV-647			AnnexinV-	80.7	3845	rhodopsin-GFP	DR5	AnnexinV-647
> > >	Specimen_001_D1_D01_010.fcs/all cells/Single Cells/FITC-A-	GFP-	99.8	11903	empty + Tg	non-targeting	AnnexinV-647			AnnexinV+	30.4	1808	rhodopsin-GFP	non-targeting	AnnexinV-647
	Specimen_001_D2_D02_011.fcs			17648	MPZ	non-targeting	AnnexinV-647			AnnexinV+	29.1	1285	rhodopsin-GFP	non-targeting	AnnexinV-647
>	Specimen_001_D2_D02_011.fcs/all cells		42.3	7465	MPZ	non-targeting	AnnexinV-647			AnnexinV+	0	0	rhodopsin-GFP	non-targeting	AnnexinV-647
> >	Specimen_001_D2_D02_011.fcs/all cells/Single Cells		65.7	4904	MPZ	non-targeting	AnnexinV-647			AnnexinV+	19.4	1470	rhodopsin-GFP	DR5	AnnexinV-647
> > >	Specimen_001_D2_D02_011.fcs/all cells/Single Cells/APC-A+	AnnexinV+	25.8	1266	MPZ	non-targeting	AnnexinV-647			AnnexinV+	19.3	921	rhodopsin-GFP	DR5	AnnexinV-647
> > >	Specimen_001_D2_D02_011.fcs/all cells/Single Cells/APC-A-	AnnexinV-	74.2	3638	MPZ	non-targeting	AnnexinV-647			GFP-	25.4	1512	rhodopsin-GFP	non-targeting	unstained
> > >	Specimen_001_D2_D02_011.fcs/all cells/Single Cells/FITC-A+	GFP+	71	3483	MPZ	non-targeting	AnnexinV-647			GFP-	27.8	1228	rhodopsin-GFP	non-targeting	unstained
> > >	Specimen_001_D2_D02_011.fcs/all cells/Single Cells/FITC-A-	GFP-	29	1421	MPZ	non-targeting	AnnexinV-647			GFP-	24	1097	rhodopsin-GFP	non-targeting	unstained
	Specimen_001_D3_D03_012.fcs			15974	proinsulin-GFP	non-targeting	AnnexinV-647			GFP-	24.4	1849	rhodopsin-GFP	DR5	unstained
>	Specimen_001_D3_D03_012.fcs/all cells		40.2	6415	proinsulin-GFP	non-targeting	AnnexinV-647			GFP-	22.3	1063	rhodopsin-GFP	DR5	unstained
> >	Specimen_001_D3_D03_012.fcs/all cells/Single Cells		66.1	4242	proinsulin-GFP	non-targeting	AnnexinV-647			GFP+	74.6	4445	rhodopsin-GFP	non-targeting	AnnexinV-647
> > >	Specimen_001_D3_D03_012.fcs/all cells/Single Cells/APC-A+	AnnexinV+	34.7	1470	proinsulin-GFP	non-targeting	AnnexinV-647			GFP+	72.2	3193	rhodopsin-GFP	non-targeting	AnnexinV-647
> > >	Specimen_001_D3_D03_012.fcs/all cells/Single Cells/APC-A-	AnnexinV-	65.3	2772	proinsulin-GFP	non-targeting	AnnexinV-647			GFP+	76	3472	rhodopsin-GFP	non-targeting	AnnexinV-647
> > >	Specimen_001_D3_D03_012.fcs/all cells/Single Cells/FITC-A+	GFP+	72.8	3090	proinsulin-GFP	non-targeting	AnnexinV-647			GFP+	75.6	5722	rhodopsin-GFP	DR5	AnnexinV-647
> > >	Specimen_001_D3_D03_012.fcs/all cells/Single Cells/FITC-A-	GFP-	27.2	1152	proinsulin-GFP	non-targeting	AnnexinV-647			GFP+	77.7	3703	rhodopsin-GFP	DR5	AnnexinV-647
	Specimen_001_E1_E01_013.fcs			31027	empty + Tg	non-targeting	AnnexinV-647
>	Specimen_001_E1_E01_013.fcs/all cells		52.2	16193	empty + Tg	non-targeting	AnnexinV-647
> >	Specimen_001_E1_E01_013.fcs/all cells/Single Cells		70.4	11393	empty + Tg	non-targeting	AnnexinV-647
> > >	Specimen_001_E1_E01_013.fcs/all cells/Single Cells/APC-A+	AnnexinV+	25.7	2928	empty + Tg	non-targeting	AnnexinV-647
> > >	Specimen_001_E1_E01_013.fcs/all cells/Single Cells/APC-A-	AnnexinV-	74.3	8465	empty + Tg	non-targeting	AnnexinV-647
> > >	Specimen_001_E1_E01_013.fcs/all cells/Single Cells/FITC-A+	GFP+	0.18	20	empty + Tg	non-targeting	AnnexinV-647
> > >	Specimen_001_E1_E01_013.fcs/all cells/Single Cells/FITC-A-	GFP-	99.8	11373	empty + Tg	non-targeting	AnnexinV-647
	Specimen_001_E2_E02_014.fcs			17561	MPZ-GFP	non-targeting	AnnexinV-647
>	Specimen_001_E2_E02_014.fcs/all cells		37.2	6528	MPZ-GFP	non-targeting	AnnexinV-647
> >	Specimen_001_E2_E02_014.fcs/all cells/Single Cells		70.3	4589	MPZ-GFP	non-targeting	AnnexinV-647
> > >	Specimen_001_E2_E02_014.fcs/all cells/Single Cells/APC-A+	AnnexinV+	32	1469	MPZ-GFP	non-targeting	AnnexinV-647
> > >	Specimen_001_E2_E02_014.fcs/all cells/Single Cells/APC-A-	AnnexinV-	68	3120	MPZ-GFP	non-targeting	AnnexinV-647
> > >	Specimen_001_E2_E02_014.fcs/all cells/Single Cells/FITC-A+	GFP+	73.6	3378	MPZ-GFP	non-targeting	AnnexinV-647
> > >	Specimen_001_E2_E02_014.fcs/all cells/Single Cells/FITC-A-	GFP-	26.4	1211	MPZ-GFP	non-targeting	AnnexinV-647
	Specimen_001_E3_E03_015.fcs			19234	proinsulin-GFP	non-targeting	AnnexinV-647
>	Specimen_001_E3_E03_015.fcs/all cells		40.2	7739	proinsulin-GFP	non-targeting	AnnexinV-647
> >	Specimen_001_E3_E03_015.fcs/all cells/Single Cells		68.4	5294	proinsulin-GFP	non-targeting	AnnexinV-647
> > >	Specimen_001_E3_E03_015.fcs/all cells/Single Cells/APC-A+	AnnexinV+	39.4	2085	proinsulin-GFP	non-targeting	AnnexinV-647
> > >	Specimen_001_E3_E03_015.fcs/all cells/Single Cells/APC-A-	AnnexinV-	60.6	3209	proinsulin-GFP	non-targeting	AnnexinV-647
> > >	Specimen_001_E3_E03_015.fcs/all cells/Single Cells/FITC-A+	GFP+	73.4	3885	proinsulin-GFP	non-targeting	AnnexinV-647
> > >	Specimen_001_E3_E03_015.fcs/all cells/Single Cells/FITC-A-	GFP-	26.6	1409	proinsulin-GFP	non-targeting	AnnexinV-647
	Specimen_002_A4_A04_017.fcs			15119	MPZ-GFP	DR5	AnnexinV-647
>	Specimen_002_A4_A04_017.fcs/all cells		49.4	7469	MPZ-GFP	DR5	AnnexinV-647
> >	Specimen_002_A4_A04_017.fcs/all cells/Single Cells		71.9	5371	MPZ-GFP	DR5	AnnexinV-647
> > >	Specimen_002_A4_A04_017.fcs/all cells/Single Cells/APC-A+	AnnexinV+	17	911	MPZ-GFP	DR5	AnnexinV-647
> > >	Specimen_002_A4_A04_017.fcs/all cells/Single Cells/APC-A-	AnnexinV-	83	4460	MPZ-GFP	DR5	AnnexinV-647
> > >	Specimen_002_A4_A04_017.fcs/all cells/Single Cells/FITC-A+	GFP+	73.6	3954	MPZ-GFP	DR5	AnnexinV-647
> > >	Specimen_002_A4_A04_017.fcs/all cells/Single Cells/FITC-A-	GFP-	26.4	1417	MPZ-GFP	DR5	AnnexinV-647
	Specimen_002_A5_A05_018.fcs			20894	rhodopsin-GFP	DR5	AnnexinV-647
>	Specimen_002_A5_A05_018.fcs/all cells		50.1	10472	rhodopsin-GFP	DR5	AnnexinV-647
> >	Specimen_002_A5_A05_018.fcs/all cells/Single Cells		72.3	7571	rhodopsin-GFP	DR5	AnnexinV-647
> > >	Specimen_002_A5_A05_018.fcs/all cells/Single Cells/APC-A+	AnnexinV+	19.4	1470	rhodopsin-GFP	DR5	AnnexinV-647
> > >	Specimen_002_A5_A05_018.fcs/all cells/Single Cells/APC-A-	AnnexinV-	80.6	6101	rhodopsin-GFP	DR5	AnnexinV-647
> > >	Specimen_002_A5_A05_018.fcs/all cells/Single Cells/FITC-A+	GFP+	75.6	5722	rhodopsin-GFP	DR5	AnnexinV-647
> > >	Specimen_002_A5_A05_018.fcs/all cells/Single Cells/FITC-A-	GFP-	24.4	1849	rhodopsin-GFP	DR5	AnnexinV-647
	Specimen_002_A6_A06_019.fcs			17640	proinsulin-GFP	DR5	AnnexinV-647
>	Specimen_002_A6_A06_019.fcs/all cells		55.5	9799	proinsulin-GFP	DR5	AnnexinV-647
> >	Specimen_002_A6_A06_019.fcs/all cells/Single Cells		73	7152	proinsulin-GFP	DR5	AnnexinV-647
> > >	Specimen_002_A6_A06_019.fcs/all cells/Single Cells/APC-A+	AnnexinV+	17.9	1278	proinsulin-GFP	DR5	AnnexinV-647
> > >	Specimen_002_A6_A06_019.fcs/all cells/Single Cells/APC-A-	AnnexinV-	82.1	5874	proinsulin-GFP	DR5	AnnexinV-647
> > >	Specimen_002_A6_A06_019.fcs/all cells/Single Cells/FITC-A+	GFP+	72.5	5188	proinsulin-GFP	DR5	AnnexinV-647
> > >	Specimen_002_A6_A06_019.fcs/all cells/Single Cells/FITC-A-	GFP-	27.5	1964	proinsulin-GFP	DR5	AnnexinV-647
	Specimen_002_B4_B04_020.fcs			8516	MPZ-GFP	DR5	AnnexinV-647
>	Specimen_002_B4_B04_020.fcs/all cells		48.1	4095	MPZ-GFP	DR5	AnnexinV-647
> >	Specimen_002_B4_B04_020.fcs/all cells/Single Cells		70.3	2878	MPZ-GFP	DR5	AnnexinV-647
> > >	Specimen_002_B4_B04_020.fcs/all cells/Single Cells/APC-A+	AnnexinV+	17.8	512	MPZ-GFP	DR5	AnnexinV-647
> > >	Specimen_002_B4_B04_020.fcs/all cells/Single Cells/APC-A-	AnnexinV-	82.2	2366	MPZ-GFP	DR5	AnnexinV-647
> > >	Specimen_002_B4_B04_020.fcs/all cells/Single Cells/FITC-A+	GFP+	73.3	2109	MPZ-GFP	DR5	AnnexinV-647
> > >	Specimen_002_B4_B04_020.fcs/all cells/Single Cells/FITC-A-	GFP-	26.7	769	MPZ-GFP	DR5	AnnexinV-647
	Specimen_002_B5_B05_021.fcs			13642	rhodopsin-GFP	DR5	AnnexinV-647
>	Specimen_002_B5_B05_021.fcs/all cells		49.9	6806	rhodopsin-GFP	DR5	AnnexinV-647
> >	Specimen_002_B5_B05_021.fcs/all cells/Single Cells		70	4766	rhodopsin-GFP	DR5	AnnexinV-647
> > >	Specimen_002_B5_B05_021.fcs/all cells/Single Cells/APC-A+	AnnexinV+	19.3	921	rhodopsin-GFP	DR5	AnnexinV-647
> > >	Specimen_002_B5_B05_021.fcs/all cells/Single Cells/APC-A-	AnnexinV-	80.7	3845	rhodopsin-GFP	DR5	AnnexinV-647
> > >	Specimen_002_B5_B05_021.fcs/all cells/Single Cells/FITC-A+	GFP+	77.7	3703	rhodopsin-GFP	DR5	AnnexinV-647
> > >	Specimen_002_B5_B05_021.fcs/all cells/Single Cells/FITC-A-	GFP-	22.3	1063	rhodopsin-GFP	DR5	AnnexinV-647
	Specimen_002_B6_B06_022.fcs			12789	proinsulin-GFP	DR5	AnnexinV-647
>	Specimen_002_B6_B06_022.fcs/all cells		54.8	7010	proinsulin-GFP	DR5	AnnexinV-647
> >	Specimen_002_B6_B06_022.fcs/all cells/Single Cells		71.9	5038	proinsulin-GFP	DR5	AnnexinV-647
> > >	Specimen_002_B6_B06_022.fcs/all cells/Single Cells/APC-A+	AnnexinV+	16	806	proinsulin-GFP	DR5	AnnexinV-647
> > >	Specimen_002_B6_B06_022.fcs/all cells/Single Cells/APC-A-	AnnexinV-	84	4232	proinsulin-GFP	DR5	AnnexinV-647
> > >	Specimen_002_B6_B06_022.fcs/all cells/Single Cells/FITC-A+	GFP+	72.8	3670	proinsulin-GFP	DR5	AnnexinV-647
> > >	Specimen_002_B6_B06_022.fcs/all cells/Single Cells/FITC-A-	GFP-	27.2	1368	proinsulin-GFP	DR5	AnnexinV-647

## Sheet: compiled for MPZ
		2017-01-17 Replicate		2018-06-21 Rep 1		2018-06-21 Rep 2			Construct	siRNA	legend	Annexin V-	Annexin V-	Annexin V-	Annexin V+	Annexin V+	Annexin V+	avg Annexin V-	avg Annexin V+	stdev Annexin V-	stdev Annexin V+
Construct	siRNA	Annexin V-	Annexin V+	Annexin V-	Annexin V+	Annexin V-	Annexin V+		empty	scrambled	empty scrambled	85.7	96	96	14.3	4.05	4.01	92.5667	7.45333	5.94671	5.92942
empty	scrambled	85.7	14.3	96	4.05	96	4.01		empty + Tg	scrambled	empty + Tg scrambled	51.9	67.8	74.3	48.1	32.2	25.7	64.6667	35.3333	11.524	11.524
empty + Tg	scrambled	51.9	48.1	67.8	32.2	74.3	25.7		MPZ-GFP	scrambled	MPZ-GFP scrambled	58.2	74.2	68	41.8	25.8	32	66.8	33.2	8.06722	8.06722
MPZ-GFP	scrambled	58.2	41.8	74.2	25.8	68	32		MPZ-GFP	siDR5	MPZ-GFP siDR5	89.6	83	82.2	10.4	17	17.8	84.9333	15.0667	4.0612	4.0612
MPZ-GFP	DR5	89.6	10.4	83	17	82.2	17.8		cyto-GFP	scrambled	cyto-GFP scrambled	86.8	87.9	86	13.2	12.1	14	86.9	13.1	0.953939	0.953939
cyto-GFP	scrambled	86.8	13.2	87.9	12.1	86	14

## Sheet: Prism T-tests
Table Analyzed	empty vs. MPZ vs. GFP	empty vs. MPZ vs. GFP	empty vs. MPZ vs. GFP	empty vs. MPZ vs. GFP
Column B	empty w Tg	MPZ-GFP siDR5	GFP	GFP
vs.	vs.	vs.	vs.	vs.
Column A	empty	MPZ-GFP	MPZ-GFP	MPZ-GFP siDR5
Unpaired t test
P value	0.0204	0.0254	0.0128	0.46
P value summary	*	*	*	ns
Significantly different? (P < 0.05)	Yes	Yes	Yes	No
One- or two-tailed P value?	Two-tailed	Two-tailed	Two-tailed	Two-tailed
t, df	t=3.7 df=4	t=3.5 df=4	t=4.3 df=4	t=0.82 df=4
How big is the difference?
Mean ± SEM of column A	7.5 ± 3.4 N=3	33 ± 4.7 N=3	33 ± 4.7 N=3	15 ± 2.3 N=3
Mean ± SEM of column B	35 ± 6.7 N=3	15 ± 2.3 N=3	13 ± 0.55 N=3	13 ± 0.55 N=3
Difference between means	28 ± 7.5	-18 ± 5.2	-20 ± 4.7	-2.0 ± 2.4
95% confidence interval	7.1 to 49	-33 to -3.7	-33 to -7.1	-8.7 to 4.7
R square	0.78	0.75	0.82	0.14
F test to compare variances
F,DFn, Dfd	3.8, 2, 2	3.9, 2, 2	72, 2, 2	18, 2, 2
P value	0.4186	0.4044	0.0276	0.1046
P value summary	ns	ns	*	ns
Significantly different? (P < 0.05)	No	No	Yes	No
