# Supplementary material for: Misfolded proteins bind and activate death receptor 5 to trigger apoptosis during unresolved endoplasmic reticulum stress
Source: eLife journal article supplement (doi:10.7554/elife.52291), 2020-01-06
Supplement: fig1-data4 [file Source Data Fig 1S1A - qPCR MPZ.xlsx]

## Sheet: Set up - R1
cDNA	GAPDH	GAPDH	GAPDH	MPZ	MPZ	MPZ	DR5 total	DR5 total	DR5 total	CHOP	CHOP	CHOP
empty traffo
WT MPZ GFP - 125 ng
WT MPZ GFP - 250 ng
WT MPZ GFP - 500 ng
WT MPZ GFP - 1000 ng
BiP primers	empty traffo			WT MPZ GFP - 250 ng			WT MPZ GFP - 1000 ng			empty
	WT MPZ GFP - 125 ng			WT MPZ GFP - 500 ng
reaction volume (ul)	20
cDNA	2
Sybr Green mix (2x)	10
forward primer (10 uM)	0.5
reverse primer (10 uM)	0.5
water	7
Aylin's suggestions: dilute cDNA master mix so that I pipette 4 ul into each well
make 4 different master mixes for the primer sets
use sterile filtered tips!
master mix	1x	3.5x
Sybr Green mix (2x)	10	227.5
forward primer (10 uM)	0.5	11.375
reverse primer (10 uM)	0.5	11.375
water	5	113.75
volume to distribute	16	112
added 16 ul of each primer master mix to the rows
then added 4 ul of each cDNA dilution (1:2) to each column

## Sheet: Cq values
cDNA (samples harvested on 2017-11-09)	GAPDH (288+289)	GAPDH	GAPDH	MPZ (296+297)	MPZ	MPZ	DR5 total (298+299)	DR5 total	DR5 total	CHOP (292+293)	CHOP	CHOP
empty traffo	18.0987	18.1293	18.1351	32.5124	32.1899	31.908	23.9742	24	24.0282	25.7671	26.0516	26.0851
WT MPZ GFP - 125 ng	17.4023	17.3968	17.5087	17.0477	17.1329	17.1354	23.2244	23.1963	23.2503	24.356	24.294	24.5568
WT MPZ GFP - 250 ng	16.6717	16.7897	16.7151	14.1976	14.238	14.2506	22.5738	22.4671	22.4746	23.6799	23.7077	23.6579
WT MPZ GFP - 500 ng	17.6599	17.4681	17.4765	12.5415	12.7266	13.1031	22.6988	22.6184	22.6537	23.7666	23.4073	23.7263
WT MPZ GFP - 1000 ng	18.0692	17.9689	18.1142	11.318	12.1633	12.0359	22.9459	22.9236	22.9366	23.7805	23.7246	24.0069
BiP primers	20.8624	20.8309	20.7916	19.2105	19.1313	19.2367	18.3539	18.9507	18.9734	NaN	NaN	34.3668
	20.1923	20.0437	19.9963	19.4297	19.6468	19.6873				NaN	38.7414	NaN
										empty	empty	empty
	Cq	st dev
	GAPDH	GAPDH
empty traffo	18.121	0.0196018
WT MPZ GFP - 125 ng	17.4359	0.0631074
WT MPZ GFP - 250 ng	16.7255	0.0597135
WT MPZ GFP - 500 ng	17.5348	0.108384
WT MPZ GFP - 1000 ng	18.0508	0.0743952
Cq(sample) - avg Cq(GAPDH)
cDNA	GAPDH (288+289)	GAPDH	GAPDH	MPZ (296+297)	MPZ	MPZ	DR5 total (298+299)	DR5 total	DR5 total	CHOP (292+293)	CHOP	CHOP	BiP	BiP	BiP
empty traffo	-0.0223843	0.00828761	0.0140967	14.3914	14.0689	13.787	5.85318	5.87894	5.90719	7.6461	7.9306	7.96407	2.74135	2.70991	2.67058
WT MPZ GFP - 125 ng	-0.0336573	-0.039144	0.0728013	-0.388244	-0.302973	-0.300558	5.78847	5.76041	5.81439	6.92012	6.85811	7.1209	2.75636	2.60784	2.56041
WT MPZ GFP - 250 ng	-0.0538392	0.0642252	-0.010386	-2.52788	-2.48752	-2.47486	5.84835	5.74157	5.74913	6.95444	6.98216	6.93239	2.48499	2.40583	2.51123
WT MPZ GFP - 500 ng	0.125059	-0.066702	-0.0583567	-4.99337	-4.80827	-4.43177	5.16393	5.08357	5.1189	6.2318	5.87243	6.19141	1.89489	2.11191	2.15242
WT MPZ GFP - 1000 ng	0.0183839	-0.0818636	0.0634797	-6.73272	-5.88746	-6.01489	4.89516	4.87282	4.8858	5.72969	5.67382	5.95609	0.303108	0.899885	0.922594
2^-(deltaCq)
cDNA	GAPDH (288+289)	GAPDH	GAPDH	MPZ (296+297)	MPZ	MPZ	DR5 total (298+299)	DR5 total	DR5 total	CHOP (292+293)	CHOP	CHOP	BiP	BiP	BiP
empty traffo	1.01564	0.994272	0.990276	4.65328e-05	5.81896e-05	7.07479e-05	0.0172989	0.0169927	0.0166632	0.00499222	0.00409875	0.00400477	0.149545	0.152839	0.157064
WT MPZ GFP - 125 ng	1.0236	1.0275	0.95079	1.3088	1.23368	1.23162	0.0180925	0.0184478	0.0177702	0.00825729	0.00861995	0.00718449	0.147997	0.164045	0.169528
WT MPZ GFP - 250 ng	1.03802	0.956459	1.00722	5.76724	5.60815	5.55915	0.0173569	0.0186902	0.0185926	0.00806313	0.00790972	0.00818733	0.178626	0.1887	0.175406
WT MPZ GFP - 500 ng	0.916967	1.04732	1.04128	31.8534	28.0178	21.5822	0.0278934	0.0294912	0.0287778	0.0133058	0.0170696	0.0136836	0.268894	0.231341	0.224935
WT MPZ GFP - 1000 ng	0.987338	1.05838	0.956953	106.353	59.1972	64.664	0.0336056	0.03413	0.0338242	0.0188448	0.019589	0.0161079	0.810505	0.53593	0.52756
FOR BIP
avg. 2^-(deltaCq) for WT MPZ DMSO
cDNA	GAPDH (288+289)	GAPDH	GAPDH	MPZ (296+297)	MPZ	MPZ	DR5 total (298+299)	DR5 total	DR5 total	CHOP (292+293)	CHOP	CHOP	BiP	BiP	BiP
empty traffo	1.00006	1.00006	1.00006	5.84901e-05	5.84901e-05	5.84901e-05	0.0169849	0.0169849	0.0169849	0.00436524	0.00436524	0.00436524	0.153149	0.153149	0.153149
fold induction relative to WT MPZ DMSO
cDNA	GAPDH (288+289)	GAPDH	GAPDH	MPZ (296+297)	MPZ	MPZ	DR5 total (298+299)	DR5 total	DR5 total	CHOP (292+293)	CHOP	CHOP	BiP	BiP	BiP
empty traffo	1.01557	0.994211	0.990215	0.795568	0.994862	1.20957	1.01849	1.00046	0.981057	1.14363	0.93895	0.917422	0.976464	0.997976	1.02556
WT MPZ GFP - 125 ng	1.02354	1.02744	0.950731	22376.4	21092.2	21056.9	1.06521	1.08613	1.04624	1.8916	1.97468	1.64584	0.966353	1.07114	1.10694
WT MPZ GFP - 250 ng	1.03796	0.9564	1.00716	98601.9	95881.9	95044.3	1.0219	1.1004	1.09465	1.84712	1.81198	1.87557	1.16635	1.23213	1.14533
WT MPZ GFP - 500 ng	0.91691	1.04726	1.04121	544594	479017	368989	1.64225	1.73632	1.69432	3.04812	3.91034	3.13466	1.75576	1.51055	1.46873
WT MPZ GFP - 1000 ng	0.987277	1.05832	0.956894	1.81832e+06	1.01209e+06	1.10555e+06	1.97856	2.00943	1.99143	4.31702	4.48748	3.69004	5.29225	3.49939	3.44474
avg. and st dev fold induction relative to WT MPZ DMSO	avg.	st. dev
cDNA	GAPDH	GAPDH	GAPDH	MPZ (296+297)	MPZ	MPZ	DR5 total (298+299)	DR5 total	DR5 total	CHOP (292+293)	CHOP	CHOP	BiP	BiP	BiP
empty traffo	1	0.0136346		1	0.207049		1	0.0187181		1	0.124851		1	0.0246104
WT MPZ GFP - 125 ng	1.00057	0.0432063		21508.5	751.842		1.06586	0.0199531		1.83737	0.170994		1.04815	0.0730611
WT MPZ GFP - 250 ng	1.00051	0.0411852		96509.4	1859.95		1.07232	0.0437583		1.84489	0.0318557		1.18127	0.0452831
WT MPZ GFP - 500 ng	1.00179	0.073573		464200	88735.3		1.69096	0.0471254		3.36437	0.474794		1.57835	0.155061
WT MPZ GFP - 1000 ng	1.00083	0.0520529		1.31199e+06	440977		1.99314	0.0155088		4.16485	0.419938		4.07879	1.05124
MPZ norm to GAPDH
cDNA	avg. GAPDH (288+289)		legend names	MPZ (296+297)	MPZ	MPZ	avg MPZ	st dev		avg cDNA	empty traffo	WT MPZ GFP - 125 ng	WT MPZ GFP - 250 ng	WT MPZ GFP - 500 ng	WT MPZ GFP - 1000 ng		st dev	empty traffo	WT MPZ GFP - 125 ng	WT MPZ GFP - 250 ng	WT MPZ GFP - 500 ng	WT MPZ GFP - 1000 ng
empty traffo	1.00006		empty	4.653e-05	5.8186e-05	7.07436e-05	5.84865e-05	1.21096e-05		GAPDH	1	1.00057	1.00051	1.00179	1.00083	0		0.0136346	0.0432063	0.0411852	0.073573	0.0520529	0
WT MPZ GFP - 125 ng	1.00063		0.125	1.30797	1.2329	1.23084	1.25724	0.0439476		DR5	1	1.06586	1.07232	1.69096	1.99314	0		0.0187181	0.0199531	0.0437583	0.0471254	0.0155088	0
WT MPZ GFP - 250 ng	1.00057		0.25	5.76396	5.60496	5.55599	5.64163	0.108727		CHOP	1	1.83737	1.84489	3.36437	4.16485	0		0.124851	0.170994	0.0318557	0.474794	0.419938	0
WT MPZ GFP - 500 ng	1.00186		0.5	31.7944	27.9659	21.5422	27.1008	5.18053		BiP	1	1.04815	1.18127	1.57835	4.07879	0		0.0246104	0.0730611	0.0452831	0.155061	1.05124	0
WT MPZ GFP - 1000 ng	1.00089		1	106.259	59.1445	64.6064	76.6699	25.7698		MPZ	5.84865e-05	1.25724	5.64163	27.1008	76.6699			1.21096e-05	0.0439476	0.108727	5.18053	25.7698	0.74581

## Sheet: Sheet5
fold induction relative to WT MPZ DMSO
	empty traffo			WT MPZ GFP - 125 ng			WT MPZ GFP - 250 ng			WT MPZ GFP - 500 ng			WT MPZ GFP - 1000 ng
GAPDH	1.01557	0.994211	0.990215	1.02354	1.02744	0.950731	1.03796	0.9564	1.00716	0.91691	1.04726	1.04121	0.987277	1.05832	0.956894
DR5	1.01849	1.00046	0.981057	1.06521	1.08613	1.04624	1.0219	1.1004	1.09465	1.64225	1.73632	1.69432	1.97856	2.00943	1.99143
CHOP	1.14363	0.93895	0.917422	1.8916	1.97468	1.64584	1.84712	1.81198	1.87557	3.04812	3.91034	3.13466	4.31702	4.48748	3.69004
BiP	0.976464	0.997976	1.02556	0.966353	1.07114	1.10694	1.16635	1.23213	1.14533	1.75576	1.51055	1.46873	5.29225	3.49939	3.44474
MPZ	4.65328e-05	5.81896e-05	7.07479e-05	1.3088	1.23368	1.23162	5.76724	5.60815	5.55915	31.8534	28.0178	21.5822	106.353	59.1972	64.664

## Sheet: qPCR 1000 ng MPZ Rep 2
cDNA (samples harvested on 2017-11-09)	GAPDH (288+289)	GAPDH	GAPDH	MPZ (296+297)	MPZ	MPZ	DR5 total (298+299)	DR5 total	DR5 total	CHOP (292+293)	CHOP	CHOP
empty traffo	16.9286	17.0113	17.1144	30.5393	32.2886	31.7643	23.0191	23.118	23.1349	24.9301	25.1848	25.1034
empty traffo + Tg	17.4701	17.5369	17.4646	30.0434	27.9087	28.378	21.8819	21.6208	21.7879	22.0936	22.3243	22.2953
WT MPZ GFP - 1000 ng	17.8066	17.773	17.8061	12.2845	12.3638	11.9534	22.9495	22.8678	22.9428	23.097	23.0709	23.3203
BiP primers	19.4948	19.6891	19.662	18.1632	18.6069	18.4577
	17.4298	17.2812	17.2993
	Cq	st dev
	GAPDH	GAPDH
empty traffo	17.0181	0.0930782
empty traffo + Tg	17.4906	0.0402707
WT MPZ GFP - 1000 ng	17.7952	0.0192565
Cq(sample) - avg Cq(GAPDH)
cDNA	GAPDH (288+289)	GAPDH	GAPDH	MPZ (296+297)	MPZ	MPZ	DR5 total (298+299)	DR5 total	DR5 total	CHOP (292+293)	CHOP	CHOP	BiP	BiP	BiP
empty traffo	-0.0894641	-0.00684982	0.0963139	13.5212	15.2705	14.7462	6.00095	6.09994	6.1168	7.91198	8.16673	8.08527	2.47674	2.67103	2.64394
empty traffo + Tg	-0.0204177	0.0463899	-0.0259722	12.5528	10.4182	10.8875	4.39134	4.13022	4.29732	4.60305	4.83371	4.80475	-0.0607494	-0.209363	-0.19128
WT MPZ GFP - 1000 ng	0.0113883	-0.0222333	0.0108451	-5.51072	-5.43145	-5.84179	5.15433	5.07255	5.14761	5.30177	5.2757	5.52505	0.368043	0.811714	0.662479
2^-(deltaCq)
cDNA	GAPDH (288+289)	GAPDH	GAPDH	MPZ (296+297)	MPZ	MPZ	DR5 total (298+299)	DR5 total	DR5 total	CHOP (292+293)	CHOP	CHOP	BiP	BiP	BiP
empty traffo	1.06397	1.00476	0.93542	8.5059e-05	2.53002e-05	3.63879e-05	0.0156147	0.0145793	0.0144098	0.00415199	0.00347993	0.00368205	0.17965	0.157015	0.15999
empty traffo + Tg	1.01425	0.968356	1.01817	0.000166427	0.000730824	0.000527888	0.0476515	0.0571056	0.0508603	0.0411475	0.0350678	0.0357789	1.04301	1.15618	1.14178
WT MPZ GFP - 1000 ng	0.992137	1.01553	0.992511	45.5923	43.1549	57.3527	0.0280797	0.0297174	0.0282108	0.0253517	0.0258141	0.0217167	0.774833	0.569704	0.631792
			average	48.7
FOR BIP
avg. 2^-(deltaCq) for WT MPZ DMSO
cDNA	GAPDH (288+289)	GAPDH	GAPDH	MPZ (296+297)	MPZ	MPZ	DR5 total (298+299)	DR5 total	DR5 total	CHOP (292+293)	CHOP	CHOP	BiP	BiP	BiP
empty traffo	1.00138	1.00138	1.00138	4.89157e-05	4.89157e-05	4.89157e-05	0.0148679	0.0148679	0.0148679	0.00377132	0.00377132	0.00377132	0.165552	0.165552	0.165552
fold induction relative to WT MPZ DMSO
cDNA	GAPDH (288+289)	GAPDH	GAPDH	MPZ (296+297)	MPZ	MPZ	DR5 total (298+299)	DR5 total	DR5 total	CHOP (292+293)	CHOP	CHOP	BiP	BiP	BiP
empty traffo	1.0625	1.00337	0.934126	1.73889	0.517221	0.743891	1.05023	0.980586	0.969187	1.10094	0.922734	0.976329	1.08516	0.948434	0.966406
empty traffo + Tg	1.01285	0.967017	1.01676	3.40232	14.9405	10.7918	3.20498	3.84086	3.4208	10.9106	9.29854	9.4871	6.30019	6.98378	6.89679
WT MPZ GFP - 1000 ng	0.990765	1.01413	0.991139	932059	882231	1.17248e+06	1.88861	1.99876	1.89742	6.72223	6.84484	5.75837	4.68031	3.44125	3.81628
avg. and st dev fold induction relative to WT MPZ DMSO	avg.	st. dev
cDNA	GAPDH	GAPDH	GAPDH	MPZ (296+297)	MPZ	MPZ	DR5 total (298+299)	DR5 total	DR5 total	CHOP (292+293)	CHOP	CHOP	BiP	BiP	BiP
empty traffo	1	0.0642549		1	0.649855		1	0.0438698		1	0.0914293		1	0.0742962
empty traffo + Tg	0.998875	0.0276587		9.71153	5.84444		3.48888	0.323357		9.89875	0.881365		6.72692	0.372112
WT MPZ GFP - 1000 ng	0.998677	0.0133809		995590	155204		1.92826	0.0612098		6.44181	0.595043		3.97928	0.635408
