# Supplementary material for: Misfolded proteins bind and activate death receptor 5 to trigger apoptosis during unresolved endoplasmic reticulum stress
Source: eLife journal article supplement (doi:10.7554/elife.52291), 2020-01-06
Supplement: fig1-data5 [file Source Data Fig 1S1E - C8 glo MPZ time course.xlsx]

## Sheet: Sheet1
		set up
		1x10	1x10	1x20	1x20	1x40	1x40	1x80	1x80
		empty	empty + Tg	empty	empty + Tg	empty	empty + Tg	empty	empty + Tg
		3 hr MPZ	7 hr MPZ	3 hr MPZ	7 hr MPZ	3 hr MPZ	7 hr MPZ	3 hr MPZ	7 hr MPZ
		10 hr MPZ	20 hr MPZ	10 hr MPZ	20 hr MPZ	10 hr MPZ	20 hr MPZ	10 hr MPZ	20 hr MPZ
		MPZ 24 hr	blank	MPZ 24 hr	blank	MPZ 24 hr	blank	MPZ 24 hr	blank
##BLOCKS= 1
Plate:	Plate01	1.3	PlateFormat	Endpoint	Luminescence	Raw	FALSE	1
	Temperature(¡C)	1	2	3	4	5	6	7	8
	22.8	9530.01	7454.98	5416.44	3551.99	2917.41	2097.5	1524.69	1106.31
		10953.6	10585.8	5938.71	5756.19	2951.1	2911.79	1670.7	1597.69
		14123.7	12076.8	7530.79	6351.47	3563.22	3501.45	2049.77	1819.52
		10279.7	162.858	5250.77	120.74	2695.58	33.695	1437.64	33.695
			raw RLUs
			dilution	empty	3 hr MPZ	7 hr MPZ	10 hr MPZ	20 hr MPZ	MPZ 24 hr
			0.1	9530.01	10953.6	10585.8	14123.7	12076.8	10279.7
			0.05	5416.44	5938.71	5756.19	7530.79	6351.47	5250.77
			0.025	2917.41	2951.1	2911.79	3563.22	3501.45	2695.58
			0.0125	1524.69	1670.7	1597.69	2049.77	1819.52	1437.64
			norm factor to empty - intden	1	0.915483	0.861719	0.906592	0.947595	2.27226
			normalized RLUs
			dilution	empty	3 hr MPZ	7 hr MPZ	10 hr MPZ	20 hr MPZ	MPZ 24 hr
			0.1	9530.01	10027.8	9121.97	12804.5	11443.9	23358.2
			0.05	5416.44	5436.79	4960.22	6827.35	6018.62	11931.1
			0.025	2917.41	2701.68	2509.15	3230.39	3317.96	6125.06
			0.0125	1524.69	1529.5	1376.76	1858.3	1724.17	3266.7
			fold change rel to empty
			dilution	24 hr empty vector	3 hr MPZ	7 hr MPZ	10 hr MPZ	20 hr MPZ	24 hr MPZ
			0.1	1	1.05224	0.957184	1.34359	1.20083	2.45101
			0.05	1	1.00376	0.915772	1.26049	1.11118	2.20276
			0.025	1	0.926056	0.86006	1.10728	1.1373	2.09949
			0.0125	1	1.00315	0.90298	1.21881	1.13083	2.14253
			average fold change	1	0.996301	0.908999	1.23254	1.14503	2.22395
			st dev fold change	0	0.0521724	0.0399952	0.0983062	0.0388189	0.15719

## Sheet: Coomassie quant
ROI	Area	min	max	IntDen	RawIntDen	background subtracted - max	background subtracted - intden	norm factor to empty - max	norm factor to empty - intden	sample
1	0.006	34207	36847	199.789	12926740	1788	541108	2.04474	1.78929	empty + Tg
2	0.006	34823	38715	206.39	13353832	3656	968200	1	1	empty
3	0.006	35295	39915	207.772	13443216	4856	1057584	0.752883	0.915483	3 hr MPZ
4	0.006	35355	39067	208.792	13509200	4008	1123568	0.912176	0.861719	7 hr MPZ
5	0.006	34411	39467	207.932	13453588	4408	1067956	0.829401	0.906592	10 hr MPZ
6	0.006	33955	39611	207.218	13407376	4552	1021744	0.803163	0.947595	20 hr MPZ
7	0.006	33047	37827	198.012	12811728	2768	426096	1.32081	2.27226	MPZ 24 hr
8	0.006	32951	35059	191.426	12385632
