# Supplementary material for: Misfolded proteins bind and activate death receptor 5 to trigger apoptosis during unresolved endoplasmic reticulum stress
Source: eLife journal article supplement (doi:10.7554/elife.52291), 2020-01-06
Supplement: fig1-data6 [file elife-52291-fig1-data6-v2.zip]

# Countess II Live/Dead Report

File name: 20190523 hct chop 500 rep 3\_R.pdf  
Date: 05.24.2019 08:21:42 AM

## Results:

| Concentration |                            |                            |
|---------------|----------------------------|----------------------------|
| Total         | 5.26 x 10 <sup>6</sup> /mL |                            |
| Live          | 94%                        | 4.92 x 10 <sup>6</sup> /mL |
| Dead          | 6%                         | 3.40 x 10 <sup>5</sup> /mL |

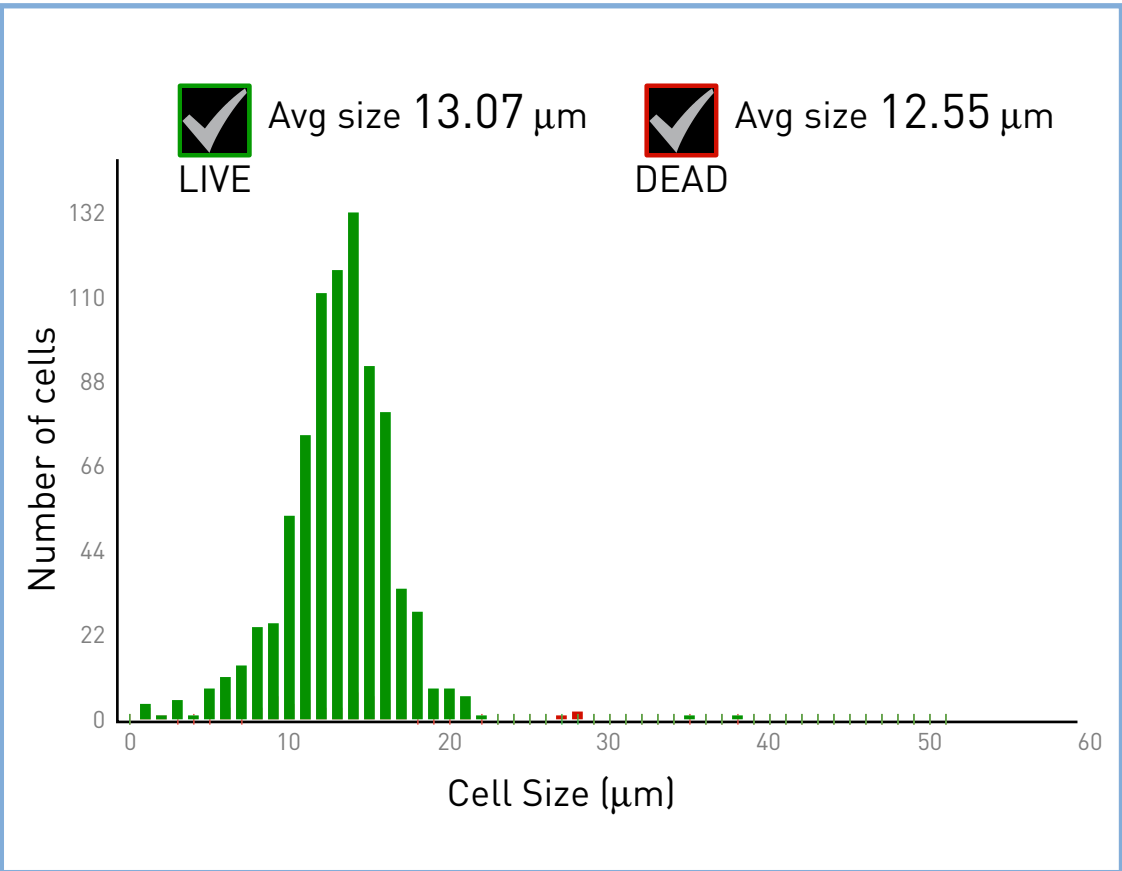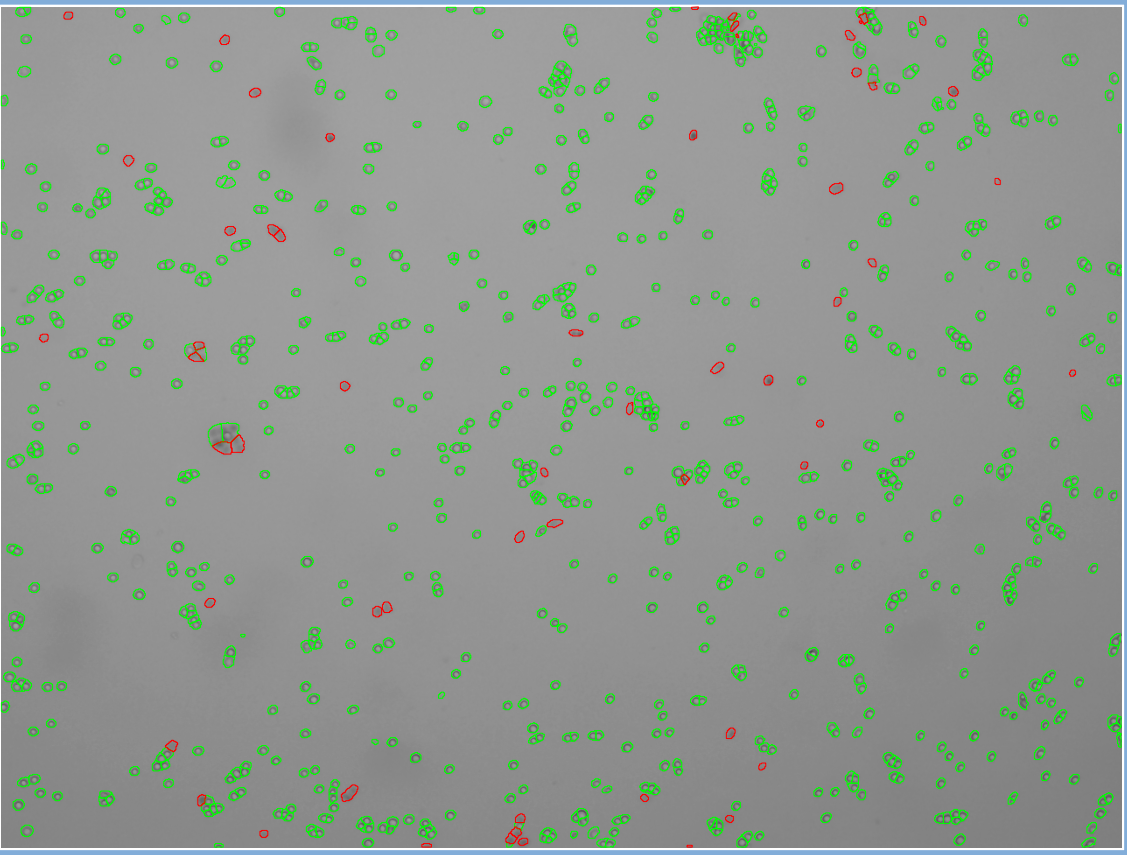

## Profile: Default

|                       |              |         |         |
|-----------------------|--------------|---------|---------|
| Auto FL threshold: On |              | Live    | Dead    |
| Auto lighting: On     | Size:        | 0 , 60  | 0 , 60  |
|                       | Brightness:  | 0 , 255 | 0 , 255 |
|                       | Circularity: | 0.48    | 0.51    |
