# Supplementary material for: Misfolded proteins bind and activate death receptor 5 to trigger apoptosis during unresolved endoplasmic reticulum stress
Source: eLife journal article supplement (doi:10.7554/elife.52291), 2020-01-06
Supplement: fig1-data6 [file elife-52291-fig1-data6-v2.zip]

# Countess II Live/Dead Report

File name: hct empty\_R.pdf

Date: 05.22.2019 09:01:54 AM

## Results:

| Concentration |     |                            |
|---------------|-----|----------------------------|
| Total         |     | 5.75 x 10 <sup>6</sup> /mL |
| Live          | 96% | 5.54 x 10 <sup>6</sup> /mL |
| Dead          | 4%  | 2.11 x 10 <sup>5</sup> /mL |

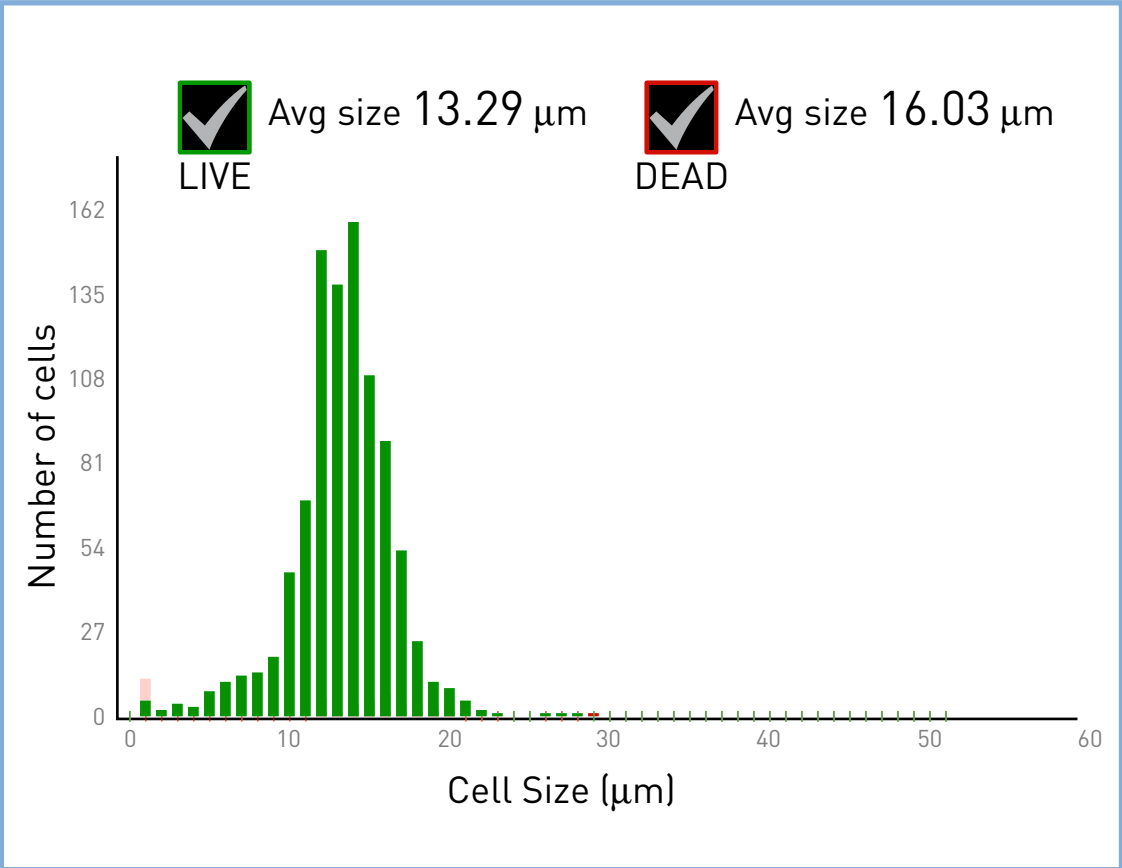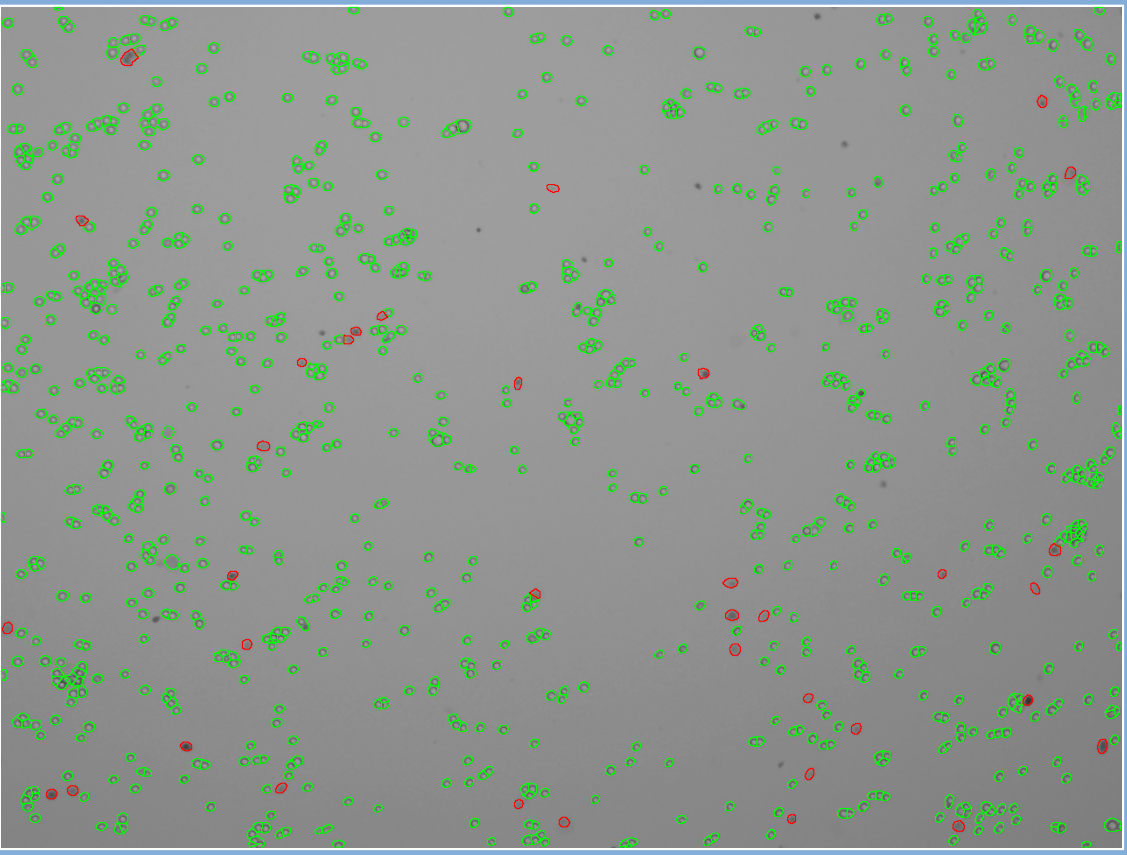

## Profile: Default(\*)

|                       |                     |         |
|-----------------------|---------------------|---------|
| Auto FL threshold: On | Live                | Dead    |
| Auto lighting: On     | Size: 0 , 60        | 12 , 60 |
|                       | Brightness: 0 , 255 | 0 , 255 |
|                       | Circularity: 0.39   | 0.45    |
