# Supplementary material for: Misfolded proteins bind and activate death receptor 5 to trigger apoptosis during unresolved endoplasmic reticulum stress
Source: eLife journal article supplement (doi:10.7554/elife.52291), 2020-01-06
Supplement: fig1-data6 [file Source Data Fig 1S2B - qPCR CHOP.xlsx]

## Sheet: Cq data
cDNA	GAPDH	GAPDH	GAPDH	CHOP (VB_255 + VB_256)	CHOP (VB_255 + VB_256)	CHOP (VB_255 + VB_256)	DR5 total	DR5 total	DR5 total	BiP	BiP	BiP
HCT116 pRK CHOP 0 ng	17.5494	17.663	18.3137	24.576	24.3186	24.3431	23.5703	23.9816	23.8446	21.2501	21.3286	21.5276
HCT116 pRK CHOP 31 ng	21.2893	21.0431	21.0393	23.6555	23.4304	23.3088	27.2178	27.1888	26.0542	26.4823	26.2708	26.4075
HCT116 pRK CHOP 62 ng	21.1616	21.0608	21.1616	22.1414	22.0709	21.888	27.1402	27.0292	27.268	26.1395	26.2342	26.3287
HCT116 pRK CHOP 125 ng	21.8469	21.4899	21.4342	20.3073	20.7153	20.1463	27.2246	27.2669	27.4479	25.7694	26.0353	26.3316
HCT116 pRK CHOP 250 ng	21.239	21.116	20.928	19.0458	18.9523	18.9607	27.2262	27.0611	27.2667	25.2585	25.7857	25.8721
HCT116 pRK CHOP 500 ng	22.1803	22.4772	21.8574	18.0137	18.3023	18.309	27.1768	27.332	27.3265	26.6336	26.2848	26.9201
HCT116 + 100 nM Tg for 24 hours	18.4508	18.6001	18.4643	22.2429	22.1342	22.1122	21.9933	22.1396	22.231	18.4515	18.3746	18.4721
HCT116 pEGFP MPZ 1000 ng	18.7563	18.4846	18.5314	24.4581	24.3553	24.182	23.3292	23.3064	23.4625	20.9945	20.9141	20.9074
	Cq	st dev
cDNA	GAPDH	GAPDH
HCT116 pRK CHOP 0 ng	17.842	0.412408
HCT116 pRK CHOP 31 ng	21.1239	0.143258
HCT116 pRK CHOP 62 ng	21.128	0.0582083
HCT116 pRK CHOP 125 ng	21.5903	0.223955
HCT116 pRK CHOP 250 ng	21.0943	0.156609
HCT116 pRK CHOP 500 ng	22.1716	0.309982
HCT116 + 100 nM Tg for 24 hours	18.5051	0.0825736
HCT116 pEGFP MPZ 1000 ng	18.508	0.0330884
Cq(sample) - avg Cq(GAPDH)
cDNA	GAPDH	GAPDH	GAPDH	CHOP (VB_255 + VB_256)	CHOP (VB_255 + VB_256)	CHOP (VB_255 + VB_256)	DR5 total	DR5 total	DR5 total	BiP	BiP	BiP
HCT116 pRK CHOP 0 ng	-0.292647	-0.17902	0.471667	6.73395	6.47658	6.50109	5.7283	6.13955	6.00257	3.40805	3.48658	3.68558
HCT116 pRK CHOP 31 ng	0.165406	-0.0808224	-0.0845836	2.53166	2.30653	2.18494	6.09387	6.06496	4.93031	5.35846	5.14689	5.28363
HCT116 pRK CHOP 62 ng	0.0336099	-0.0672132	0.0336033	1.01338	0.942938	0.760072	6.01222	5.90123	6.14002	5.01156	5.10624	5.20077
HCT116 pRK CHOP 125 ng	0.256597	-0.100467	-0.15613	-1.28304	-0.875001	-1.44403	5.63431	5.67657	5.8576	4.17912	4.445	4.7413
HCT116 pRK CHOP 250 ng	0.144645	0.0216707	-0.166315	-2.04855	-2.14204	-2.1336	6.13193	5.96674	6.17236	4.16418	4.69141	4.77779
HCT116 pRK CHOP 500 ng	0.00869496	0.305543	-0.314238	-4.15797	-3.86936	-3.86259	5.00516	5.16039	5.15487	4.46196	4.11322	4.74847
HCT116 + 100 nM Tg for 24 hours	-0.0542466	0.0950304	-0.0407838	3.73784	3.62909	3.60709	3.48818	3.6345	3.72594	-0.0536331	-0.130475	-0.0330005
HCT116 pEGFP MPZ 1000 ng	0.248274	-0.023397	0.023397	5.95011	5.8473	5.67402	4.82123	4.79838	4.95454	2.48652	2.40607	2.39944
2^-(deltaCq)
	GAPDH	GAPDH	GAPDH	CHOP (VB_255 + VB_256)	CHOP (VB_255 + VB_256)	CHOP (VB_255 + VB_256)	DR5 total	DR5 total	DR5 total	BiP	BiP	BiP
HCT116 pRK CHOP 0 ng	1.22489	1.13211	0.721131	0.00939464	0.0112294	0.0110402	0.0188629	0.0141845	0.0155972	0.094205	0.0892144	0.0777194
HCT116 pRK CHOP 31 ng	0.891678	1.05762	1.06038	0.17294	0.202145	0.219921	0.0146407	0.014937	0.0327967	0.0243749	0.0282249	0.0256725
HCT116 pRK CHOP 62 ng	0.976973	1.04769	0.976977	0.495384	0.520172	0.590467	0.0154932	0.0167322	0.0141798	0.0310006	0.0290314	0.0271902
HCT116 pRK CHOP 125 ng	0.83706	1.07212	1.11429	2.43351	1.83401	2.7208	0.0201328	0.0195516	0.0172459	0.0552026	0.0459114	0.0373876
HCT116 pRK CHOP 250 ng	0.904602	0.985091	1.12219	4.1369	4.41386	4.3881	0.0142596	0.0159894	0.0138655	0.0557772	0.0387031	0.0364538
HCT116 pRK CHOP 500 ng	0.993991	0.809137	1.24336	17.8515	14.6148	14.5464	0.0311384	0.0279619	0.0280692	0.0453749	0.0577828	0.0372021
HCT116 + 100 nM Tg for 24 hours	1.03832	0.936253	1.02867	0.0749547	0.0808232	0.0820649	0.0891153	0.0805205	0.0755755	1.03788	1.09465	1.02314
HCT116 pEGFP MPZ 1000 ng	0.841903	1.01635	0.983913	0.0161748	0.0173695	0.0195862	0.0353725	0.0359371	0.0322503	0.178436	0.188668	0.189538
avg. 2^-(deltaCq) for empty traffo
cDNA	GAPDH	GAPDH	GAPDH	CHOP (VB_255 + VB_256)	CHOP (VB_255 + VB_256)	CHOP (VB_255 + VB_256)	DR5 total	DR5 total	DR5 total	BiP	BiP	BiP
HCT116 pRK CHOP 0 ng	1.02604	1.02604	1.02604	0.0105547	0.0105547	0.0105547	0.0162149	0.0162149	0.0162149	0.0870463	0.0870463	0.0870463
HCT116 pRK CHOP 0 ng	1.02604	1.02604	1.02604	0.0105547	0.0105547	0.0105547	0.0162149	0.0162149	0.0162149	0.0870463	0.0870463	0.0870463
HCT116 pRK CHOP 0 ng	1.02604	1.02604	1.02604	0.0105547	0.0105547	0.0105547	0.0162149	0.0162149	0.0162149	0.0870463	0.0870463	0.0870463
HCT116 pRK CHOP 0 ng	1.02604	1.02604	1.02604	0.0105547	0.0105547	0.0105547	0.0162149	0.0162149	0.0162149	0.0870463	0.0870463	0.0870463
HCT116 pRK CHOP 0 ng	1.02604	1.02604	1.02604	0.0105547	0.0105547	0.0105547	0.0162149	0.0162149	0.0162149	0.0870463	0.0870463	0.0870463
HCT116 pRK CHOP 0 ng	1.02604	1.02604	1.02604	0.0105547	0.0105547	0.0105547	0.0162149	0.0162149	0.0162149	0.0870463	0.0870463	0.0870463
HCT116 pRK CHOP 0 ng	1.02604	1.02604	1.02604	0.0105547	0.0105547	0.0105547	0.0162149	0.0162149	0.0162149	0.0870463	0.0870463	0.0870463
HCT116 pRK CHOP 0 ng	1.02604	1.02604	1.02604	0.0105547	0.0105547	0.0105547	0.0162149	0.0162149	0.0162149	0.0870463	0.0870463	0.0870463
fold induction relative to empty traffo
	GAPDH	GAPDH	GAPDH	CHOP (VB_255 + VB_256)	CHOP (VB_255 + VB_256)	CHOP (VB_255 + VB_256)	DR5 total	DR5 total	DR5 total	BiP	BiP	BiP
HCT116 pRK CHOP 0 ng	1.19379	1.10338	0.702827	0.890087	1.06392	1.046	1.16331	0.874781	0.961908	1.08224	1.02491	0.892851
HCT116 pRK CHOP 31 ng	0.869044	1.03078	1.03347	16.3851	19.1521	20.8362	0.902917	0.921194	2.02263	0.280022	0.324252	0.29493
HCT116 pRK CHOP 62 ng	0.952175	1.0211	0.952179	46.9347	49.2833	55.9433	0.955496	1.03191	0.874491	0.356139	0.333517	0.312365
HCT116 pRK CHOP 125 ng	0.815813	1.04491	1.08601	230.561	173.762	257.78	1.24163	1.20578	1.06359	0.634176	0.527437	0.429514
HCT116 pRK CHOP 250 ng	0.881641	0.960087	1.0937	391.947	418.188	415.746	0.879413	0.986098	0.855109	0.640777	0.444627	0.418787
HCT116 pRK CHOP 500 ng	0.968761	0.788599	1.2118	1691.32	1384.67	1378.19	1.92036	1.72446	1.73108	0.521274	0.663817	0.427383
HCT116 + 100 nM Tg for 24 hours	1.01196	0.912488	1.00256	7.10152	7.65753	7.77517	5.4959	4.96584	4.66088	11.9233	12.5755	11.754
HCT116 pEGFP MPZ 1000 ng	0.820533	0.990552	0.958939	1.53247	1.64565	1.85567	2.18149	2.2163	1.98893	2.04989	2.16745	2.17744
avg. and st dev fold induction relative to empty traffo	avg.	st. dev		avg.	st. dev		avg.	st. dev		avg.	st. dev
cDNA	GAPDH	GAPDH	GAPDH	CHOP (VB_255 + VB_256)	CHOP (VB_255 + VB_256)	CHOP (VB_255 + VB_256)	DR5 total (298+299)	DR5 total	DR5 total	BiP	BiP	BiP
HCT116 pRK CHOP 0 ng	1	0.2613		1	0.0956087		1	0.147988		1	0.0971205
HCT116 pRK CHOP 31 ng	0.977762	0.0941619		18.7911	2.24742		0.912055	0.0129238		0.299735	0.0225032
HCT116 pRK CHOP 62 ng	0.97515	0.0397916		50.7204	4.67306		0.953964	0.0787181		0.334007	0.0218911
HCT116 pRK CHOP 125 ng	0.982244	0.145591		220.701	42.8684		1.17033	0.0941651		0.530376	0.102362
HCT116 pRK CHOP 250 ng	0.978478	0.107221		408.627	14.4967		0.906873	0.0696782		0.501397	0.121396
HCT116 pRK CHOP 500 ng	0.989719	0.212375		1484.73	178.947		1.79197	0.11124		0.537491	0.119048
HCT116 + 100 nM Tg for 24 hours	0.975671	0.0549192		7.5114	0.359812		5.04087	0.422538		12.0843	0.43381
HCT116 pEGFP MPZ 1000 ng	0.923341	0.0904268		1.67793	0.164002		2.12891	0.122464		2.13159	0.070931
norm to GAPDH
avg cDNA	HCT116 pRK CHOP 0 ng	HCT116 pRK CHOP 31 ng	HCT116 pRK CHOP 62 ng	HCT116 pRK CHOP 125 ng	HCT116 pRK CHOP 250 ng	HCT116 pRK CHOP 500 ng	HCT116 + 100 nM Tg for 24 hours	HCT116 pEGFP MPZ 1000 ng	st dev	HCT116 pRK CHOP 0 ng	HCT116 pRK CHOP 31 ng	HCT116 pRK CHOP 62 ng	HCT116 pRK CHOP 125 ng	HCT116 pRK CHOP 250 ng	HCT116 pRK CHOP 500 ng	HCT116 + 100 nM Tg for 24 hours	HCT116 pEGFP MPZ 1000 ng
GAPDH	1	0.977762	0.97515	0.982244	0.978478	0.989719	0.975671	0.923341		0.2613	0.0941619	0.0397916	0.145591	0.107221	0.212375	0.0549192	0.0904268
DR5	1	0.912055	0.953964	1.17033	0.906873	1.79197	5.04087	2.12891		0.147988	0.0129238	0.0787181	0.0941651	0.0696782	0.11124	0.422538	0.122464
GADD34	1	1	1.11713	1.44179	1.57927	2.1696	11.3183	5.39095		0.0609212	0.133884	0.200402	0.139175	0.167814	0.141177	0.282608	0.0804094
CHOP	1	18.7911	50.7204	220.701	408.627	1484.73	7.5114	1.67793		0.0956087	2.24742	4.67306	42.8684	14.4967	178.947	0.359812	0.164002

## Sheet: Cq data 2
GAPDH	GAPDH	GAPDH	GAPDH	ERO1alpha (386+387)	ERO1alpha (386+387)	ERO1alpha (386+387)	GADD34 (388+389)	GADD34 (388+389)	GADD34 (388+389)	GFP	GFP	GFP
HCT116 pRK CHOP 0 ng	18.1227	18.1003	18.1776	24.0161	23.978	23.943	25.9695	26.0942	25.9218	25.0018	24.9995	24.9532
HCT116 pRK CHOP 31 ng	21.7972	21.8526	21.4771	27.6161	27.432	27.3692	30.454	30.8437	30.6022	27.7635	27.6282	27.6948
HCT116 pRK CHOP 62 ng	21.594	21.566	21.4451	27.2773	27.3019	27.1558	30.5785	30.0545	30.2865	27.7041	27.5816	27.516
HCT116 pRK CHOP 125 ng	22.2338	21.8551	21.5535	27.5753	27.4876	27.4141	30.1537	30.4301	30.2352	25.4772	25.7293	25.7902
HCT116 pRK CHOP 250 ng	21.7583	21.5047	21.3981	27.2224	27.1722	27.1729	29.7792	29.6805	29.9868	27.1577	27.2834	27.398
HCT116 pRK CHOP 500 ng	23.0862	22.2608	22.0656	27.7616	27.8835	27.7734	30.1719	30.3572	30.2838	26.8901	24.6354	26.8928
HCT116 + 100 nM Tg for 24 hours	18.7125	18.7047	19.0673	24.9109	24.8957	24.8725	23.1685	23.165	23.2295	28.7863	28.767	29.0418
HCT116 pEGFP MPZ 1000 ng	19.005	18.7926	18.6612	24.7266	24.4692	24.6318	24.1763	24.1336	24.159	14.3149	14.7285	13.5639
	Cq	st dev
cDNA	GAPDH	GAPDH	GAPDH	ERO1alpha (386+387)	ERO1alpha (386+387)	ERO1alpha (386+387)	GADD34 (388+389)	GADD34 (388+389)	GADD34 (388+389)	GFP	GFP	GFP
HCT116 pRK CHOP 0 ng	18.1335	0.0397642		melt curves for these primers showed two peaks
HCT116 pRK CHOP 31 ng	21.709	0.202691
HCT116 pRK CHOP 62 ng	21.535	0.0791631
HCT116 pRK CHOP 125 ng	21.8808	0.340856
HCT116 pRK CHOP 250 ng	21.5537	0.185049
HCT116 pRK CHOP 500 ng	22.4709	0.541734
HCT116 + 100 nM Tg for 24 hours	18.8282	0.20713
HCT116 pEGFP MPZ 1000 ng	18.7269	0.0928738
Cq(sample) - avg Cq(GAPDH)
cDNA	GAPDH	GAPDH	GAPDH	ERO1alpha (386+387)	ERO1alpha (386+387)	ERO1alpha (386+387)	GADD34 (388+389)	GADD34 (388+389)	GADD34 (388+389)	GFP	GFP	GFP
HCT116 pRK CHOP 0 ng	-0.0108226	-0.0332325	0.0440551	5.88259	5.84447	5.80948	7.83594	7.96068	7.78827	6.86826	6.86601	6.81971
HCT116 pRK CHOP 31 ng	0.0882358	0.143617	-0.231853	5.90708	5.72303	5.66024	8.74501	9.13472	8.89323	6.05455	5.91926	5.98585
HCT116 pRK CHOP 62 ng	0.0589928	0.0309741	-0.0899669	5.7423	5.76681	5.62075	9.04348	8.51947	8.75146	6.16904	6.04656	5.98099
HCT116 pRK CHOP 125 ng	0.352974	-0.0256905	-0.327284	5.69453	5.60683	5.53329	8.27291	8.54934	8.35442	3.59644	3.84851	3.90944
HCT116 pRK CHOP 250 ng	0.204632	-0.0490469	-0.155585	5.6687	5.61851	5.61916	8.22552	8.12681	8.43309	5.60403	5.72968	5.84433
HCT116 pRK CHOP 500 ng	0.61531	-0.210079	-0.405231	5.2907	5.4126	5.30257	7.70101	7.88633	7.81288	4.41923	2.16454	4.42193
HCT116 + 100 nM Tg for 24 hours	-0.1157	-0.123432	0.239132	6.08276	6.06753	6.04436	4.34038	4.33682	4.40138	9.95818	9.93883	10.2137
HCT116 pEGFP MPZ 1000 ng	0.278071	0.0656717	-0.0656717	5.99967	5.74231	5.90485	5.4494	5.40667	5.43208	-4.412	-3.99846	-5.16304
2^-(deltaCq)
	GAPDH	GAPDH	GAPDH	ERO1alpha (386+387)	ERO1alpha (386+387)	ERO1alpha (386+387)	GADD34 (388+389)	GADD34 (388+389)	GADD34 (388+389)	GFP	GFP	GFP
HCT116 pRK CHOP 0 ng	1.00753	1.0233	0.969925	0.0169498	0.0174036	0.0178309	0.00437669	0.00401419	0.00452374	0.00855951	0.00857283	0.00885246
HCT116 pRK CHOP 31 ng	0.940672	0.905247	1.17434	0.0166644	0.018932	0.0197741	0.00233072	0.001779	0.00210315	0.0150452	0.0165243	0.015779
HCT116 pRK CHOP 62 ng	0.959934	0.978759	1.06435	0.0186808	0.0183661	0.0203229	0.00189514	0.0027251	0.00232032	0.0138974	0.0151288	0.0158322
HCT116 pRK CHOP 125 ng	0.782968	1.01797	1.25465	0.0193097	0.0205199	0.0215931	0.003233	0.00266926	0.0030554	0.0826732	0.0694199	0.0665489
HCT116 pRK CHOP 250 ng	0.86776	1.03458	1.11387	0.0196585	0.0203545	0.0203453	0.00334096	0.00357756	0.00289326	0.0205598	0.0188449	0.0174052
HCT116 pRK CHOP 500 ng	0.65279	1.15675	1.3243	0.025547	0.0234771	0.0253377	0.00480578	0.00422648	0.00444721	0.0467389	0.223053	0.0466517
HCT116 + 100 nM Tg for 24 hours	1.0835	1.08932	0.847255	0.0147539	0.0149104	0.0151519	0.0493645	0.0494864	0.0473209	0.00100529	0.00101886	0.00084212
HCT116 pEGFP MPZ 1000 ng	0.824693	0.9555	1.04657	0.0156286	0.0186807	0.0166903	0.0228859	0.0235738	0.0231623	21.2885	15.9829	35.8286
avg. 2^-(deltaCq) for empty traffo
cDNA	GAPDH	GAPDH	GAPDH	ERO1alpha (386+387)	ERO1alpha (386+387)	ERO1alpha (386+387)	GADD34 (388+389)	GADD34 (388+389)	GADD34 (388+389)	GFP	GFP	GFP
HCT116 pRK CHOP 0 ng	1.00025	1.00025	1.00025	0.0173947	0.0173947	0.0173947	0.00430487	0.00430487	0.00430487	0.0086616	0.0086616	0.0086616
HCT116 pRK CHOP 0 ng	1.00025	1.00025	1.00025	0.0173947	0.0173947	0.0173947	0.00207096	0.00207096	0.00207096	0.0086616	0.0086616	0.0086616
HCT116 pRK CHOP 0 ng	1.00025	1.00025	1.00025	0.0173947	0.0173947	0.0173947	0.00207096	0.00207096	0.00207096	0.0086616	0.0086616	0.0086616
HCT116 pRK CHOP 0 ng	1.00025	1.00025	1.00025	0.0173947	0.0173947	0.0173947	0.00207096	0.00207096	0.00207096	0.0086616	0.0086616	0.0086616
HCT116 pRK CHOP 0 ng	1.00025	1.00025	1.00025	0.0173947	0.0173947	0.0173947	0.00207096	0.00207096	0.00207096	0.0086616	0.0086616	0.0086616
HCT116 pRK CHOP 0 ng	1.00025	1.00025	1.00025	0.0173947	0.0173947	0.0173947	0.00207096	0.00207096	0.00207096	0.0086616	0.0086616	0.0086616
HCT116 pRK CHOP 0 ng	1.00025	1.00025	1.00025	0.0173947	0.0173947	0.0173947	0.00430487	0.00430487	0.00430487	0.0086616	0.0086616	0.0086616
HCT116 pRK CHOP 0 ng	1.00025	1.00025	1.00025	0.0173947	0.0173947	0.0173947	0.00430487	0.00430487	0.00430487	0.0086616	0.0086616	0.0086616
fold induction relative to empty traffo
	GAPDH	GAPDH	GAPDH	ERO1alpha (386+387)	ERO1alpha (386+387)	ERO1alpha (386+387)	GADD34 (388+389)	GADD34 (388+389)	GADD34 (388+389)	GFP	GFP	GFP
HCT116 pRK CHOP 0 ng	1.00728	1.02304	0.96968	0.974419	1.00051	1.02507	1.01668	0.932475	1.05084	0.988214	0.989752	1.02203
HCT116 pRK CHOP 31 ng	0.940435	0.905018	1.17405	0.958015	1.08838	1.13679	1.12543	0.859023	1.01554	1.737	1.90777	1.82172
HCT116 pRK CHOP 62 ng	0.959692	0.978512	1.06408	1.07393	1.05584	1.16834	0.915104	1.31587	1.12041	1.60449	1.74665	1.82786
HCT116 pRK CHOP 125 ng	0.782771	1.01771	1.25433	1.11009	1.17966	1.24136	1.56111	1.2889	1.47536	9.5448	8.01467	7.68321
HCT116 pRK CHOP 250 ng	0.867541	1.03432	1.11359	1.13014	1.17015	1.16962	1.61325	1.72749	1.39706	2.37367	2.17569	2.00947
HCT116 pRK CHOP 500 ng	0.652625	1.15646	1.32397	1.46866	1.34967	1.45663	2.32056	2.04083	2.14742	5.39611	25.7519	5.38603
HCT116 + 100 nM Tg for 24 hours	1.08323	1.08905	0.847041	0.848182	0.857181	0.871061	11.4671	11.4954	10.9924	0.116063	0.11763	0.0972245
HCT116 pEGFP MPZ 1000 ng	0.824485	0.955259	1.04631	0.898464	1.07393	0.959501	5.31628	5.47608	5.38049	2457.8	1845.26	4136.49
avg. and st dev fold induction relative to empty traffo	avg.	st. dev
cDNA	GAPDH	GAPDH	GAPDH	ERO1alpha (386+387)	ERO1alpha (386+387)	ERO1alpha (386+387)	GADD34 (388+389)	GADD34 (388+389)	GADD34 (388+389)	GFP	GFP	GFP
HCT116 pRK CHOP 0 ng	1	0.0274159		1	0.0253312		1	0.0609212		1	0.0190983
HCT116 pRK CHOP 31 ng	1.0065	0.146176		1.06106	0.0924643		1	0.133884		1.82216	0.0853855
HCT116 pRK CHOP 62 ng	1.00076	0.0556355		1.09937	0.060407		1.11713	0.200402		1.72633	0.113066
HCT116 pRK CHOP 125 ng	1.01827	0.235781		1.17704	0.0656751		1.44179	0.139175		8.41423	0.99303
HCT116 pRK CHOP 250 ng	1.00515	0.125592		1.15664	0.0229483		1.57927	0.167814		2.18628	0.182331
HCT116 pRK CHOP 500 ng	1.04435	0.34943		1.42499	0.0655052		2.1696	0.141177		12.178	11.7553
HCT116 + 100 nM Tg for 24 hours	1.00644	0.138073		0.858808	0.0115259		11.3183	0.282608		0.110306	0.0113556
HCT116 pEGFP MPZ 1000 ng	0.942017	0.111503		0.977298	0.0890753		5.39095	0.0804094		2813.19	1186.24

## Sheet: Sheet1
	HCT116 pRK CHOP 0 ng			HCT116 pRK CHOP 31 ng			HCT116 pRK CHOP 125 ng			HCT116 pRK CHOP 500 ng			HCT116 pEGFP MPZ 1000 ng
GAPDH	1.19379	1.10338	0.702827	0.869044	1.03078	1.03347	0.815813	1.04491	1.08601	0.968761	0.788599	1.21179	0.820533	0.990552	0.958939
DR5	1.16331	0.874781	0.961908	0.902917	0.921193	2.02263	1.24163	1.20578	1.06359	1.92036	1.72446	1.73108	2.18148	2.2163	1.98893
GADD34	0.974419	1.00051	1.02507	0.958015	1.08838	1.13679	1.11009	1.17966	1.24136	1.46866	1.34967	1.45663	0.898464	1.07393	0.959501
CHOP	0.890087	1.06392	1.046	16.3851	19.1521	20.8362	230.561	173.762	257.78	1691.32	1384.67	1378.19	1.53247	1.64565	1.85567
