# Supplementary material for: Misfolded proteins bind and activate death receptor 5 to trigger apoptosis during unresolved endoplasmic reticulum stress
Source: eLife journal article supplement (doi:10.7554/elife.52291), 2020-01-06
Supplement: fig1-data6 [file Source Data Fig 1S2D.xlsx]

## Sheet: compiled
Number	File Name	Date & Time	Type	Total Concentration	Total cells counted	Live concentration	Live cells counted	Dead concentration	Dead cells counted	Viability (%)	Avgerage Size (um)	Cube 1 name	Cube 1 concentration	Cube 1 (%)	Cube 1 cells counted	Cube 2 name	Cube 2 concentration	Cube 2 (%)	Cube 2 cells counted	Cube 1+2 concentration	Cube 1+2 (%)	Cube 1+2 cells counted	Focus value	BF Light intensity	Live Size min	Live Size max	Live Brightness min	Live Brightness max	Live Circularity	Dead Size min	Dead Size max	Dead Bright min	Dead Bright max	Dead Circularity	Cube 1 Light intensity	Cube 2 Light intensity	BF Size min	BF Size max	BF Brightness min	BF Brightness max	BF Circularity	Cube 1 Brightness min	Cub 1 Brightness max	Cube 2 Brightness min	Cube 2 Brightness max	Profile name	Software Revision
9	hct chop 500	05.22.2019 09:00:55 AM	BF	2480809	423	2128921	363	351888	60	85.8156	13.4208		0	0	0		0	0	0	0	0	0	2877	4	0	60	0	255	0.405458	12	60	0	255	0.494922	0	0	0	0	0	0	0	0	0	0	0	Default(*)	1.0.247
10	hct empty	05.22.2019 09:01:49 AM	BF	5747500	980	5536367	944	211133	36	96.3265	13.3888		0	0	0		0	0	0	0	0	0	2923	4	0	60	0	255	0.388117	12	60	0	255	0.454132	0	0	0	0	0	0	0	0	0	0	0	Default(*)	1.0.247
11	hct chop 250	05.22.2019 09:02:50 AM	BF	3442635	587	3225638	550	216997	37	93.6968	12.2215		0	0	0		0	0	0	0	0	0	2897	4	0	60	0	255	0.386206	12	60	0	255	0.560754	0	0	0	0	0	0	0	0	0	0	0	Default(*)	1.0.247
12	hct chop 125	05.22.2019 09:03:47 AM	BF	3477824	593	3331204	568	146620	25	95.7841	12.8128		0	0	0		0	0	0	0	0	0	2875	4	0	60	0	255	0.457851	12	60	0	255	0.454132	0	0	0	0	0	0	0	0	0	0	0	Default(*)	1.0.247
13	hct chop 62	05.22.2019 09:06:00 AM	BF	2363513	403	2228623	380	134890	23	94.2928	13.3772		0	0	0		0	0	0	0	0	0	2871	4	0	60	0	255	0.38547	12	60	0	255	0.5625	0	0	0	0	0	0	0	0	0	0	0	Default(*)	1.0.247
14	hct mpz	05.22.2019 09:06:51 AM	BF	809342	138	422265	72	387077	66	52.1739	13.9783		0	0	0		0	0	0	0	0	0	2892	4	0	60	0	255	0.471292	12	60	0	255	0.494922	0	0	0	0	0	0	0	0	0	0	0	Default(*)	1.0.247
12	20190523 hct mpz rep 2	05.24.2019 08:14:45 AM	BF	2949992	503	1876735	320	1073258	183	63.6183	11.7734		0	0	0		0	0	0	0	0	0	2907	4	0	60	0	255	0.423453	0	60	0	255	0.507287	0	0	0	0	0	0	0	0	0	0	0	Default	1.0.247
13	20190523 hct empty rep 2	05.24.2019 08:15:57 AM	BF	3835577	654	3618579	617	216997	37	94.3425	11.682		0	0	0		0	0	0	0	0	0	2886	4	0	60	0	255	0.438161	0	60	0	255	0.573552	0	0	0	0	0	0	0	0	0	0	0	Default	1.0.247
14	20190523 hct chop 1000 rep 1	05.24.2019 08:17:01 AM	BF	3319475	566	3037964	518	281510	48	91.5194	12.189		0	0	0		0	0	0	0	0	0	2913	4	0	60	0	255	0.428981	0	60	0	255	0.51573	0	0	0	0	0	0	0	0	0	0	0	Default	1.0.247
15	20190523 hct chop 1000 rep 2	05.24.2019 08:18:24 AM	BF	4363408	744	4070168	694	293240	50	93.2796	12.1156		0	0	0		0	0	0	0	0	0	2889	4	0	60	0	255	0.36545	0	60	0	255	0.532838	0	0	0	0	0	0	0	0	0	0	0	Default	1.0.247
16	20190523 hct chop 1000 rep 3	05.24.2019 08:19:24 AM	BF	4140546	706	3952873	674	187673	32	95.4674	11.7153		0	0	0		0	0	0	0	0	0	2871	4	0	60	0	255	0.406194	0	60	0	255	0.491642	0	0	0	0	0	0	0	0	0	0	0	Default	1.0.247
17	20190523 hct chop 500 rep 2	05.24.2019 08:20:25 AM	BF	4697702	801	4398597	750	299105	51	93.633	11.9688		0	0	0		0	0	0	0	0	0	2917	4	0	60	0	255	0.339455	0	60	0	255	0.547344	0	0	0	0	0	0	0	0	0	0	0	Default	1.0.247
18	20190523 hct chop 500 rep 3	05.24.2019 08:21:35 AM	BF	5260722	897	4920564	839	340158	58	93.534	13.0368		0	0	0		0	0	0	0	0	0	2895	4	0	60	0	255	0.483194	0	60	0	255	0.507287	0	0	0	0	0	0	0	0	0	0	0	Default	1.0.247
19	20190523 hct chop 250 rep 2	05.24.2019 08:22:39 AM	BF	4727026	806	4146411	707	580615	99	87.7171	12.4876		0	0	0		0	0	0	0	0	0	2871	4	0	60	0	255	0.474862	0	60	0	255	0.570457	0	0	0	0	0	0	0	0	0	0	0	Default	1.0.247
20	20190523 hct chop 250 rep 3	05.24.2019 08:23:33 AM	BF	11682674	1992	11014087	1878	668587	114	94.2771	10.495		0	0	0		0	0	0	0	0	0	2921	4	0	60	0	255	0.356057	0	60	0	255	0.51573	0	0	0	0	0	0	0	0	0	0	0	Default	1.0.247
21	20190523 hct chop 125 rep 2	05.24.2019 08:24:38 AM	BF	9031786	1540	8691628	1482	340158	58	96.2338	9.52922		0	0	0		0	0	0	0	0	0	2886	4	0	60	0	255	0.351709	0	60	0	255	0.520012	0	0	0	0	0	0	0	0	0	0	0	Default	1.0.247
22	20190523 hct chop 125 rep 3	05.24.2019 08:25:41 AM	BF	19336233	3297	18532756	3160	803477	137	95.8447	9.32211		0	0	0		0	0	0	0	0	0	2923	4	0	60	0	255	0.368753	0	60	0	255	0.424292	0	0	0	0	0	0	0	0	0	0	0	Default	1.0.247
23	20190523 hct chop empty rep 3	05.24.2019 08:26:39 AM	BF	2979316	508	2715401	463	263916	45	91.1417	12.5965		0	0	0		0	0	0	0	0	0	2873	4	0	60	0	255	0.399233	0	60	0	255	0.56284	0	0	0	0	0	0	0	0	0	0	0	Default	1.0.247
24	20190523 hct mpz rep 3	05.24.2019 08:27:36 AM	BF	4093628	698	2885480	492	1208148	206	70.4871	10.5258		0	0	0		0	0	0	0	0	0	2902	4	0	60	0	255	0.40112	0	60	0	255	0.454132	0	0	0	0	0	0	0	0	0	0	0	Default	1.0.247
25	20190523 hct empty rep 3	05.24.2019 08:28:30 AM	BF	3577526	610	3530607	602	46918	8	98.6885	12.5984		0	0	0		0	0	0	0	0	0	2881	4	0	60	0	255	0.477914	0	60	0	255	0.605881	0	0	0	0	0	0	0	0	0	0	0	Default	1.0.247

## Sheet: sorted
biological replicate	sample order for plotting	File Name	Date & Time	Type	Total Concentration	Total cells counted	Live concentration	Live cells counted	Dead concentration	Dead cells counted	Viability (%)	Avgerage Size (um)	biological replicate	sample order for plotting	File Name
1	1	hct mpz	05.22.2019 09:06:51 AM	BF	809342	138	422265	72	387077	66	52.1739	13.9783	1	1	hct mpz
1	2	hct empty	05.22.2019 09:01:49 AM	BF	5747500	980	5536367	944	211133	36	96.3265	13.3888	1	2	hct empty
1	3	hct chop 125	05.22.2019 09:03:47 AM	BF	3477824	593	3331204	568	146620	25	95.7841	12.8128	1	3	hct chop 125
1	4	hct chop 250	05.22.2019 09:02:50 AM	BF	3442635	587	3225638	550	216997	37	93.6968	12.2215	1	4	hct chop 250
1	5	hct chop 500	05.22.2019 09:00:55 AM	BF	2480809	423	2128921	363	351888	60	85.8156	13.4208	1	5	hct chop 500
1	6	20190523 hct chop 1000 rep 1	05.24.2019 08:17:01 AM	BF	3319475	566	3037964	518	281510	48	91.5194	12.189	1	6	20190523 hct chop 1000 rep 1
2	1	20190523 hct mpz rep 2	05.24.2019 08:14:45 AM	BF	2949992	503	1876735	320	1073258	183	63.6183	11.7734	2	1	20190523 hct mpz rep 2
2	2	20190523 hct empty rep 2	05.24.2019 08:15:57 AM	BF	3835577	654	3618579	617	216997	37	94.3425	11.682	2	2	20190523 hct empty rep 2
2	3	20190523 hct chop 125 rep 2	05.24.2019 08:24:38 AM	BF	9031786	1540	8691628	1482	340158	58	96.2338	9.52922	2	3	20190523 hct chop 125 rep 2
2	4	20190523 hct chop 250 rep 2	05.24.2019 08:22:39 AM	BF	4727026	806	4146411	707	580615	99	87.7171	12.4876	2	4	20190523 hct chop 250 rep 2
2	5	20190523 hct chop 500 rep 2	05.24.2019 08:20:25 AM	BF	4697702	801	4398597	750	299105	51	93.633	11.9688	2	5	20190523 hct chop 500 rep 2
2	6	20190523 hct chop 1000 rep 2	05.24.2019 08:18:24 AM	BF	4363408	744	4070168	694	293240	50	93.2796	12.1156	2	6	20190523 hct chop 1000 rep 2
3	1	20190523 hct mpz rep 3	05.24.2019 08:27:36 AM	BF	4093628	698	2885480	492	1208148	206	70.4871	10.5258	3	1	20190523 hct mpz rep 3
3	2	20190523 hct empty rep 3	05.24.2019 08:28:30 AM	BF	3577526	610	3530607	602	46918	8	98.6885	12.5984	3	2	20190523 hct empty rep 3
3	3	20190523 hct chop 125 rep 3	05.24.2019 08:25:41 AM	BF	19336233	3297	18532756	3160	803477	137	95.8447	9.32211	3	3	20190523 hct chop 125 rep 3
3	4	20190523 hct chop 250 rep 3	05.24.2019 08:23:33 AM	BF	11682674	1992	11014087	1878	668587	114	94.2771	10.495	3	4	20190523 hct chop 250 rep 3
3	5	20190523 hct chop 500 rep 3	05.24.2019 08:21:35 AM	BF	5260722	897	4920564	839	340158	58	93.534	13.0368	3	5	20190523 hct chop 500 rep 3
3	6	20190523 hct chop 1000 rep 3	05.24.2019 08:19:24 AM	BF	4140546	706	3952873	674	187673	32	95.4674	11.7153	3	6	20190523 hct chop 1000 rep 3
1	9	hct chop 62	05.22.2019 09:06:00 AM	BF	2363513	403	2228623	380	134890	23	94.2928	13.3772	1	9	hct chop 62

## Sheet: Sheet3
	Rep 1	Rep 2	Rep 3	Rep 1	Rep 2	Rep 3
legend	Trypan blue-	Trypan blue-	Trypan blue-	Trypan blue+	Trypan blue+	Trypan blue+	avg Trypan blue-	avg Trypan blue+	stdev Trypan blue-	stdev Trypan blue+
MPZ-GFP	52.1739	63.6183	70.4871	47.8261	36.3817	29.5129	62.0931	37.9069	9.25137	9.25137
empty	96.3265	94.3425	98.6885	3.67347	5.65749	1.31148	96.4525	3.54748	2.17575	2.17575
CHOP - 125 ng	95.7841	96.2338	95.8447	4.21585	3.76623	4.15529	95.9542	4.04579	0.243991	0.243991
CHOP - 250 ng	93.6968	87.7171	94.2771	6.30324	12.2829	5.72289	91.897	8.103	3.63149	3.63149
CHOP - 500 ng	85.8156	93.633	93.534	14.1844	6.36704	6.466	90.9942	9.00581	4.48506	4.48506
CHOP - 1000 ng	91.5194	93.2796	95.4674	8.48056	6.72043	4.53258	93.4221	6.57786	1.97785	1.97785

## Sheet: unpaired t tests
Table Analyzed	Data 3	Data 3	Data 3		Table Analyzed	Data 3	Data 3	Data 3
Column E	CHOP - 500 ng	CHOP - 500 ng	CHOP - 500 ng		Column D	CHOP - 250 ng	CHOP - 125 ng	CHOP - 500 ng
vs.	vs.	vs.	vs.		vs.	vs.	vs.	vs.
Column A	MPZ-GFP	CHOP - 250 ng	empty		Column C	CHOP - 125 ng	empty	CHOP - 125 ng
Unpaired t test					Unpaired t test with Welch's correction
P value	0.0082	0.7998	0.1308		P value	0.1921	0.7307	0.1952
P value summary	**	ns	ns		P value summary	ns	ns	ns
Significantly different? (P < 0.05)	Yes	No	No		Significantly different? (P < 0.05)	No	No	No
One- or two-tailed P value?	Two-tailed	Two-tailed	Two-tailed		One- or two-tailed P value?	Two-tailed	Two-tailed	Two-tailed
t, df	t=4.869 df=4	t=0.2710 df=4	t=1.897 df=4		Welch-corrected t, df	t=1.931 df=2.018	t=0.3942 df=2.050	t=1.913 df=2.012
How big is the difference?					How big is the difference?
Mean ± SEM of column A	37.91 ± 5.341, n=3	8.103 ± 2.097, n=3	3.547 ± 1.256, n=3		Mean ± SEM of column C	4.046 ± 0.1409, n=3	3.547 ± 1.256, n=3	4.046 ± 0.1409, n=3
Mean ± SEM of column E	9.006 ± 2.589, n=3	9.006 ± 2.589, n=3	9.006 ± 2.589, n=3		Mean ± SEM of column D	8.103 ± 2.097, n=3	4.046 ± 0.1409, n=3	9.006 ± 2.589, n=3
Difference between means	-28.90 ± 5.936	0.9028 ± 3.332	5.458 ± 2.878		Difference between means	4.057 ± 2.101	0.4983 ± 1.264	4.960 ± 2.593
95% confidence interval	-45.38 to -12.42	-8.348 to 10.15	-2.532 to 13.45		95% confidence interval	-4.907 to 13.02	-4.815 to 5.811	-6.135 to 16.06
R squared	0.8556	0.01802	0.4735		R squared	0.6488	0.07046	0.6452
F test to compare variances					F test to compare variances
F,DFn, Dfd	4.255, 2, 2	1.525, 2, 2	4.249, 2, 2		F,DFn, Dfd	221.5, 2, 2	79.52, 2, 2	337.9, 2, 2
P value	0.3806	0.792	0.381		P value	0.009	0.0248	0.0059
P value summary	ns	ns	ns		P value summary	**	*	**
Significantly different? (P < 0.05)	No	No	No		Significantly different? (P < 0.05)	Yes	Yes	Yes
