# Supplementary material for: Misfolded proteins bind and activate death receptor 5 to trigger apoptosis during unresolved endoplasmic reticulum stress
Source: eLife journal article supplement (doi:10.7554/elife.52291), 2020-01-06
Supplement: fig1-data8 [file Source Data Fig 1S4E Annexin V INS RHO.xlsx]

## Sheet: 2018-06-27
Depth	Name	Parameter	Statistic	#Cells	construct	siRNA	stain		Parameter	Statistic	#Cells	construct	siRNA	stain
	Specimen_004_A7_A07_001.fcs			50016	empty	non-targeting	AnnexinV-647		AnnexinV-	96.6	33115	empty	non-targeting	AnnexinV-647
>	Specimen_004_A7_A07_001.fcs/all cells		85.7	42873	empty	non-targeting	AnnexinV-647		AnnexinV-	100	6795	empty	non-targeting	unstained
> >	Specimen_004_A7_A07_001.fcs/all cells/Single Cells		80	34282	empty	non-targeting	AnnexinV-647		AnnexinV+	3.4	1167	empty	non-targeting	AnnexinV-647
> > >	Specimen_004_A7_A07_001.fcs/all cells/Single Cells/AnnexinV+	AnnexinV+	3.4	1167	empty	non-targeting	AnnexinV-647		AnnexinV+	0	0	empty	non-targeting	unstained
> > >	Specimen_004_A7_A07_001.fcs/all cells/Single Cells/AnnexinV-	AnnexinV-	96.6	33115	empty	non-targeting	AnnexinV-647		GFP-	100	34282	empty	non-targeting	AnnexinV-647
> > >	Specimen_004_A7_A07_001.fcs/all cells/Single Cells/GFP+	GFP+	0	0	empty	non-targeting	AnnexinV-647		GFP-	100	6795	empty	non-targeting	unstained
> > >	Specimen_004_A7_A07_001.fcs/all cells/Single Cells/GFP-	GFP-	100	34282	empty	non-targeting	AnnexinV-647		GFP+	0	0	empty	non-targeting	AnnexinV-647
	Specimen_004_A8_A08_002.fcs			50000	empty + Tg	non-targeting	AnnexinV-647		GFP+	0	0	empty	non-targeting	unstained
>	Specimen_004_A8_A08_002.fcs/all cells		69.7	34853	empty + Tg	non-targeting	AnnexinV-647		AnnexinV-	81.8	15825	empty + Tg	non-targeting	AnnexinV-647
> >	Specimen_004_A8_A08_002.fcs/all cells/Single Cells		55.5	19354	empty + Tg	non-targeting	AnnexinV-647		AnnexinV-	100	3765	empty + Tg	non-targeting	unstained
> > >	Specimen_004_A8_A08_002.fcs/all cells/Single Cells/AnnexinV+	AnnexinV+	18.2	3529	empty + Tg	non-targeting	AnnexinV-647		AnnexinV+	18.2	3529	empty + Tg	non-targeting	AnnexinV-647
> > >	Specimen_004_A8_A08_002.fcs/all cells/Single Cells/AnnexinV-	AnnexinV-	81.8	15825	empty + Tg	non-targeting	AnnexinV-647		AnnexinV+	0	0	empty + Tg	non-targeting	unstained
> > >	Specimen_004_A8_A08_002.fcs/all cells/Single Cells/GFP+	GFP+	0	0	empty + Tg	non-targeting	AnnexinV-647		GFP-	100	19354	empty + Tg	non-targeting	AnnexinV-647
> > >	Specimen_004_A8_A08_002.fcs/all cells/Single Cells/GFP-	GFP-	100	19354	empty + Tg	non-targeting	AnnexinV-647		GFP-	100	3765	empty + Tg	non-targeting	unstained
	Specimen_004_A9_A09_003.fcs			15476	rhodopsin-GFP	non-targeting	AnnexinV-647		GFP+	0	0	empty + Tg	non-targeting	AnnexinV-647
>	Specimen_004_A9_A09_003.fcs/all cells		33.5	5187	rhodopsin-GFP	non-targeting	AnnexinV-647		GFP+	0	0	empty + Tg	non-targeting	unstained
> >	Specimen_004_A9_A09_003.fcs/all cells/Single Cells		58.6	3041	rhodopsin-GFP	non-targeting	AnnexinV-647		AnnexinV-	68.8	1538	proinsulin-GFP	non-targeting	AnnexinV-647
> > >	Specimen_004_A9_A09_003.fcs/all cells/Single Cells/AnnexinV+	AnnexinV+	38.6	1174	rhodopsin-GFP	non-targeting	AnnexinV-647		AnnexinV-	78.1	2706	proinsulin-GFP	siDR5	AnnexinV-647
> > >	Specimen_004_A9_A09_003.fcs/all cells/Single Cells/AnnexinV-	AnnexinV-	61.4	1867	rhodopsin-GFP	non-targeting	AnnexinV-647		AnnexinV-	100	571	proinsulin-GFP	non-targeting	unstained
> > >	Specimen_004_A9_A09_003.fcs/all cells/Single Cells/GFP+	GFP+	73.1	2224	rhodopsin-GFP	non-targeting	AnnexinV-647		AnnexinV-	100	2276	proinsulin-GFP	siDR5	unstained
> > >	Specimen_004_A9_A09_003.fcs/all cells/Single Cells/GFP-	GFP-	26.9	817	rhodopsin-GFP	non-targeting	AnnexinV-647		AnnexinV+	31.2	697	proinsulin-GFP	non-targeting	AnnexinV-647
	Specimen_004_A10_A10_004.fcs			15287	rhodopsin-GFP	siDR5	AnnexinV-647		AnnexinV+	21.9	757	proinsulin-GFP	siDR5	AnnexinV-647
>	Specimen_004_A10_A10_004.fcs/all cells		46.9	7168	rhodopsin-GFP	siDR5	AnnexinV-647		AnnexinV+	0	0	proinsulin-GFP	non-targeting	unstained
> >	Specimen_004_A10_A10_004.fcs/all cells/Single Cells		58.1	4166	rhodopsin-GFP	siDR5	AnnexinV-647		AnnexinV+	0	0	proinsulin-GFP	siDR5	unstained
> > >	Specimen_004_A10_A10_004.fcs/all cells/Single Cells/AnnexinV+	AnnexinV+	19.3	805	rhodopsin-GFP	siDR5	AnnexinV-647		GFP-	39.6	886	proinsulin-GFP	non-targeting	AnnexinV-647
> > >	Specimen_004_A10_A10_004.fcs/all cells/Single Cells/AnnexinV-	AnnexinV-	80.7	3361	rhodopsin-GFP	siDR5	AnnexinV-647		GFP-	33.6	1164	proinsulin-GFP	siDR5	AnnexinV-647
> > >	Specimen_004_A10_A10_004.fcs/all cells/Single Cells/GFP+	GFP+	69.2	2882	rhodopsin-GFP	siDR5	AnnexinV-647		GFP-	34.3	196	proinsulin-GFP	non-targeting	unstained
> > >	Specimen_004_A10_A10_004.fcs/all cells/Single Cells/GFP-	GFP-	30.8	1284	rhodopsin-GFP	siDR5	AnnexinV-647		GFP-	34.1	777	proinsulin-GFP	siDR5	unstained
	Specimen_004_A11_A11_005.fcs			11451	proinsulin-GFP	non-targeting	AnnexinV-647		GFP+	60.4	1349	proinsulin-GFP	non-targeting	AnnexinV-647
>	Specimen_004_A11_A11_005.fcs/all cells		34.1	3909	proinsulin-GFP	non-targeting	AnnexinV-647		GFP+	66.4	2299	proinsulin-GFP	siDR5	AnnexinV-647
> >	Specimen_004_A11_A11_005.fcs/all cells/Single Cells		57.2	2235	proinsulin-GFP	non-targeting	AnnexinV-647		GFP+	65.7	375	proinsulin-GFP	non-targeting	unstained
> > >	Specimen_004_A11_A11_005.fcs/all cells/Single Cells/AnnexinV+	AnnexinV+	31.2	697	proinsulin-GFP	non-targeting	AnnexinV-647		GFP+	65.9	1499	proinsulin-GFP	siDR5	unstained
> > >	Specimen_004_A11_A11_005.fcs/all cells/Single Cells/AnnexinV-	AnnexinV-	68.8	1538	proinsulin-GFP	non-targeting	AnnexinV-647		AnnexinV-	61.4	1867	rhodopsin-GFP	non-targeting	AnnexinV-647
> > >	Specimen_004_A11_A11_005.fcs/all cells/Single Cells/GFP+	GFP+	60.4	1349	proinsulin-GFP	non-targeting	AnnexinV-647		AnnexinV-	80.7	3361	rhodopsin-GFP	siDR5	AnnexinV-647
> > >	Specimen_004_A11_A11_005.fcs/all cells/Single Cells/GFP-	GFP-	39.6	886	proinsulin-GFP	non-targeting	AnnexinV-647		AnnexinV-	100	1869	rhodopsin-GFP	non-targeting	unstained
	Specimen_004_A12_A12_006.fcs			15224	proinsulin-GFP	siDR5	AnnexinV-647		AnnexinV-	100	2676	rhodopsin-GFP	siDR5	unstained
>	Specimen_004_A12_A12_006.fcs/all cells		39.8	6065	proinsulin-GFP	siDR5	AnnexinV-647		AnnexinV+	38.6	1174	rhodopsin-GFP	non-targeting	AnnexinV-647
> >	Specimen_004_A12_A12_006.fcs/all cells/Single Cells		57.1	3463	proinsulin-GFP	siDR5	AnnexinV-647		AnnexinV+	19.3	805	rhodopsin-GFP	siDR5	AnnexinV-647
> > >	Specimen_004_A12_A12_006.fcs/all cells/Single Cells/AnnexinV+	AnnexinV+	21.9	757	proinsulin-GFP	siDR5	AnnexinV-647		AnnexinV+	0	0	rhodopsin-GFP	non-targeting	unstained
> > >	Specimen_004_A12_A12_006.fcs/all cells/Single Cells/AnnexinV-	AnnexinV-	78.1	2706	proinsulin-GFP	siDR5	AnnexinV-647		AnnexinV+	0	0	rhodopsin-GFP	siDR5	unstained
> > >	Specimen_004_A12_A12_006.fcs/all cells/Single Cells/GFP+	GFP+	66.4	2299	proinsulin-GFP	siDR5	AnnexinV-647		GFP-	26.9	817	rhodopsin-GFP	non-targeting	AnnexinV-647
> > >	Specimen_004_A12_A12_006.fcs/all cells/Single Cells/GFP-	GFP-	33.6	1164	proinsulin-GFP	siDR5	AnnexinV-647		GFP-	30.8	1284	rhodopsin-GFP	siDR5	AnnexinV-647
	Specimen_004_B7_B07_007.fcs			10000	empty	non-targeting	unstained		GFP-	27.6	515	rhodopsin-GFP	non-targeting	unstained
>	Specimen_004_B7_B07_007.fcs/all cells		86.1	8606	empty	non-targeting	unstained		GFP-	33.8	905	rhodopsin-GFP	siDR5	unstained
> >	Specimen_004_B7_B07_007.fcs/all cells/Single Cells		79	6795	empty	non-targeting	unstained		GFP+	73.1	2224	rhodopsin-GFP	non-targeting	AnnexinV-647
> > >	Specimen_004_B7_B07_007.fcs/all cells/Single Cells/AnnexinV+	AnnexinV+	0	0	empty	non-targeting	unstained		GFP+	69.2	2882	rhodopsin-GFP	siDR5	AnnexinV-647
> > >	Specimen_004_B7_B07_007.fcs/all cells/Single Cells/AnnexinV-	AnnexinV-	100	6795	empty	non-targeting	unstained		GFP+	72.4	1354	rhodopsin-GFP	non-targeting	unstained
> > >	Specimen_004_B7_B07_007.fcs/all cells/Single Cells/GFP+	GFP+	0	0	empty	non-targeting	unstained		GFP+	66.2	1771	rhodopsin-GFP	siDR5	unstained
> > >	Specimen_004_B7_B07_007.fcs/all cells/Single Cells/GFP-	GFP-	100	6795	empty	non-targeting	unstained
	Specimen_004_B8_B08_008.fcs			10000	empty + Tg	non-targeting	unstained
>	Specimen_004_B8_B08_008.fcs/all cells		68.3	6829	empty + Tg	non-targeting	unstained
> >	Specimen_004_B8_B08_008.fcs/all cells/Single Cells		55.1	3765	empty + Tg	non-targeting	unstained
> > >	Specimen_004_B8_B08_008.fcs/all cells/Single Cells/AnnexinV+	AnnexinV+	0	0	empty + Tg	non-targeting	unstained
> > >	Specimen_004_B8_B08_008.fcs/all cells/Single Cells/AnnexinV-	AnnexinV-	100	3765	empty + Tg	non-targeting	unstained
> > >	Specimen_004_B8_B08_008.fcs/all cells/Single Cells/GFP+	GFP+	0	0	empty + Tg	non-targeting	unstained
> > >	Specimen_004_B8_B08_008.fcs/all cells/Single Cells/GFP-	GFP-	100	3765	empty + Tg	non-targeting	unstained
	Specimen_004_B9_B09_009.fcs			10000	rhodopsin-GFP	non-targeting	unstained
>	Specimen_004_B9_B09_009.fcs/all cells		34.5	3449	rhodopsin-GFP	non-targeting	unstained
> >	Specimen_004_B9_B09_009.fcs/all cells/Single Cells		54.2	1869	rhodopsin-GFP	non-targeting	unstained
> > >	Specimen_004_B9_B09_009.fcs/all cells/Single Cells/AnnexinV+	AnnexinV+	0	0	rhodopsin-GFP	non-targeting	unstained
> > >	Specimen_004_B9_B09_009.fcs/all cells/Single Cells/AnnexinV-	AnnexinV-	100	1869	rhodopsin-GFP	non-targeting	unstained
> > >	Specimen_004_B9_B09_009.fcs/all cells/Single Cells/GFP+	GFP+	72.4	1354	rhodopsin-GFP	non-targeting	unstained
> > >	Specimen_004_B9_B09_009.fcs/all cells/Single Cells/GFP-	GFP-	27.6	515	rhodopsin-GFP	non-targeting	unstained
	Specimen_004_B10_B10_010.fcs			10000	rhodopsin-GFP	siDR5	unstained
>	Specimen_004_B10_B10_010.fcs/all cells		46.9	4685	rhodopsin-GFP	siDR5	unstained
> >	Specimen_004_B10_B10_010.fcs/all cells/Single Cells		57.1	2676	rhodopsin-GFP	siDR5	unstained
> > >	Specimen_004_B10_B10_010.fcs/all cells/Single Cells/AnnexinV+	AnnexinV+	0	0	rhodopsin-GFP	siDR5	unstained
> > >	Specimen_004_B10_B10_010.fcs/all cells/Single Cells/AnnexinV-	AnnexinV-	100	2676	rhodopsin-GFP	siDR5	unstained
> > >	Specimen_004_B10_B10_010.fcs/all cells/Single Cells/GFP+	GFP+	66.2	1771	rhodopsin-GFP	siDR5	unstained
> > >	Specimen_004_B10_B10_010.fcs/all cells/Single Cells/GFP-	GFP-	33.8	905	rhodopsin-GFP	siDR5	unstained
	Specimen_004_B11_B11_011.fcs			3452	proinsulin-GFP	non-targeting	unstained
>	Specimen_004_B11_B11_011.fcs/all cells		32.8	1131	proinsulin-GFP	non-targeting	unstained
> >	Specimen_004_B11_B11_011.fcs/all cells/Single Cells		50.5	571	proinsulin-GFP	non-targeting	unstained
> > >	Specimen_004_B11_B11_011.fcs/all cells/Single Cells/AnnexinV+	AnnexinV+	0	0	proinsulin-GFP	non-targeting	unstained
> > >	Specimen_004_B11_B11_011.fcs/all cells/Single Cells/AnnexinV-	AnnexinV-	100	571	proinsulin-GFP	non-targeting	unstained
> > >	Specimen_004_B11_B11_011.fcs/all cells/Single Cells/GFP+	GFP+	65.7	375	proinsulin-GFP	non-targeting	unstained
> > >	Specimen_004_B11_B11_011.fcs/all cells/Single Cells/GFP-	GFP-	34.3	196	proinsulin-GFP	non-targeting	unstained
	Specimen_004_B12_B12_012.fcs			10000	proinsulin-GFP	siDR5	unstained
>	Specimen_004_B12_B12_012.fcs/all cells		40.7	4072	proinsulin-GFP	siDR5	unstained
> >	Specimen_004_B12_B12_012.fcs/all cells/Single Cells		55.9	2276	proinsulin-GFP	siDR5	unstained
> > >	Specimen_004_B12_B12_012.fcs/all cells/Single Cells/AnnexinV+	AnnexinV+	0	0	proinsulin-GFP	siDR5	unstained
> > >	Specimen_004_B12_B12_012.fcs/all cells/Single Cells/AnnexinV-	AnnexinV-	100	2276	proinsulin-GFP	siDR5	unstained
> > >	Specimen_004_B12_B12_012.fcs/all cells/Single Cells/GFP+	GFP+	65.9	1499	proinsulin-GFP	siDR5	unstained
> > >	Specimen_004_B12_B12_012.fcs/all cells/Single Cells/GFP-	GFP-	34.1	777	proinsulin-GFP	siDR5	unstained

## Sheet: compiled for RHO and INS1
Parameter	Statistic	#Cells	construct	siRNA	stain	date		Parameter	Statistic	#Cells	construct	siRNA	stain	date		Construct	siRNA	legend	Annexin V-	Annexin V-	Annexin V-	Annexin V+	Annexin V+	Annexin V+	avg Annexin V-	avg Annexin V+	stdev Annexin V-	stdev Annexin V+
AnnexinV-	65.3	2772	proinsulin-GFP	non-targeting	AnnexinV-647	2018-06-21		AnnexinV-	65.3	2772	proinsulin-GFP	non-targeting	AnnexinV-647	2018-06-21		rhodopsin-GFP	scrambled	rhodopsin-GFP scrambled	69.6	70.9	61.4	30.4	29.1	38.6	67.3	32.7	5.15073	5.15073
AnnexinV-	60.6	3209	proinsulin-GFP	non-targeting	AnnexinV-647	2018-06-21		AnnexinV-	60.6	3209	proinsulin-GFP	non-targeting	AnnexinV-647	2018-06-21		rhodopsin-GFP	siDR5	rhodopsin-GFP siDR5	80.6	80.7	80.7	19.4	19.3	19.3	80.6667	19.3333	0.057735	0.057735
AnnexinV-	68.8	1538	proinsulin-GFP	non-targeting	AnnexinV-647	2018-06-27		AnnexinV-	68.8	1538	proinsulin-GFP	non-targeting	AnnexinV-647	2018-06-27		proinsulin-GFP	scrambled	proinsulin-GFP scrambled	65.3	60.6	68.8	34.7	39.4	31.2	64.9	35.1	4.11461	4.11461
AnnexinV-	100	571	proinsulin-GFP	non-targeting	unstained	2018-06-27		AnnexinV+	34.7	1470	proinsulin-GFP	non-targeting	AnnexinV-647	2018-06-21		proinsulin-GFP	siDR5	proinsulin-GFP siDR5	82.1	84	78.1	17.9	16	21.9	81.4	18.6	3.01164	3.01164
AnnexinV-	82.1	5874	proinsulin-GFP	siDR5	AnnexinV-647	2018-06-21		AnnexinV+	39.4	2085	proinsulin-GFP	non-targeting	AnnexinV-647	2018-06-21
AnnexinV-	84	4232	proinsulin-GFP	siDR5	AnnexinV-647	2018-06-21		AnnexinV+	31.2	697	proinsulin-GFP	non-targeting	AnnexinV-647	2018-06-27
AnnexinV-	78.1	2706	proinsulin-GFP	siDR5	AnnexinV-647	2018-06-27		AnnexinV-	82.1	5874	proinsulin-GFP	siDR5	AnnexinV-647	2018-06-21
AnnexinV-	100	2276	proinsulin-GFP	siDR5	unstained	2018-06-27		AnnexinV-	84	4232	proinsulin-GFP	siDR5	AnnexinV-647	2018-06-21
AnnexinV-	69.6	4149	rhodopsin-GFP	non-targeting	AnnexinV-647	2018-06-21		AnnexinV-	78.1	2706	proinsulin-GFP	siDR5	AnnexinV-647	2018-06-27
AnnexinV-	70.9	3136	rhodopsin-GFP	non-targeting	AnnexinV-647	2018-06-21		AnnexinV+	17.9	1278	proinsulin-GFP	siDR5	AnnexinV-647	2018-06-21
AnnexinV-	100	4569	rhodopsin-GFP	non-targeting	AnnexinV-647	2018-06-21		AnnexinV+	16	806	proinsulin-GFP	siDR5	AnnexinV-647	2018-06-21
AnnexinV-	61.4	1867	rhodopsin-GFP	non-targeting	AnnexinV-647	2018-06-27		AnnexinV+	21.9	757	proinsulin-GFP	siDR5	AnnexinV-647	2018-06-27
AnnexinV-	100	1869	rhodopsin-GFP	non-targeting	unstained	2018-06-27		AnnexinV-	69.6	4149	rhodopsin-GFP	non-targeting	AnnexinV-647	2018-06-21
AnnexinV-	80.6	6101	rhodopsin-GFP	siDR5	AnnexinV-647	2018-06-21		AnnexinV-	70.9	3136	rhodopsin-GFP	non-targeting	AnnexinV-647	2018-06-21
AnnexinV-	80.7	3845	rhodopsin-GFP	siDR5	AnnexinV-647	2018-06-21		AnnexinV-	61.4	1867	rhodopsin-GFP	non-targeting	AnnexinV-647	2018-06-27
AnnexinV-	80.7	3361	rhodopsin-GFP	siDR5	AnnexinV-647	2018-06-27		AnnexinV+	30.4	1808	rhodopsin-GFP	non-targeting	AnnexinV-647	2018-06-21
AnnexinV-	100	2676	rhodopsin-GFP	siDR5	unstained	2018-06-27		AnnexinV+	29.1	1285	rhodopsin-GFP	non-targeting	AnnexinV-647	2018-06-21
AnnexinV+	34.7	1470	proinsulin-GFP	non-targeting	AnnexinV-647	2018-06-21		AnnexinV+	38.6	1174	rhodopsin-GFP	non-targeting	AnnexinV-647	2018-06-27
AnnexinV+	39.4	2085	proinsulin-GFP	non-targeting	AnnexinV-647	2018-06-21		AnnexinV-	80.6	6101	rhodopsin-GFP	siDR5	AnnexinV-647	2018-06-21
AnnexinV+	31.2	697	proinsulin-GFP	non-targeting	AnnexinV-647	2018-06-27		AnnexinV-	80.7	3845	rhodopsin-GFP	siDR5	AnnexinV-647	2018-06-21
AnnexinV+	0	0	proinsulin-GFP	non-targeting	unstained	2018-06-27		AnnexinV-	80.7	3361	rhodopsin-GFP	siDR5	AnnexinV-647	2018-06-27
AnnexinV+	17.9	1278	proinsulin-GFP	siDR5	AnnexinV-647	2018-06-21		AnnexinV+	19.4	1470	rhodopsin-GFP	siDR5	AnnexinV-647	2018-06-21
AnnexinV+	16	806	proinsulin-GFP	siDR5	AnnexinV-647	2018-06-21		AnnexinV+	19.3	921	rhodopsin-GFP	siDR5	AnnexinV-647	2018-06-21
AnnexinV+	21.9	757	proinsulin-GFP	siDR5	AnnexinV-647	2018-06-27		AnnexinV+	19.3	805	rhodopsin-GFP	siDR5	AnnexinV-647	2018-06-27
AnnexinV+	0	0	proinsulin-GFP	siDR5	unstained	2018-06-27
AnnexinV+	30.4	1808	rhodopsin-GFP	non-targeting	AnnexinV-647	2018-06-21
AnnexinV+	29.1	1285	rhodopsin-GFP	non-targeting	AnnexinV-647	2018-06-21
AnnexinV+	0	0	rhodopsin-GFP	non-targeting	AnnexinV-647	2018-06-21
AnnexinV+	38.6	1174	rhodopsin-GFP	non-targeting	AnnexinV-647	2018-06-27
AnnexinV+	0	0	rhodopsin-GFP	non-targeting	unstained	2018-06-27
AnnexinV+	19.4	1470	rhodopsin-GFP	siDR5	AnnexinV-647	2018-06-21
AnnexinV+	19.3	921	rhodopsin-GFP	siDR5	AnnexinV-647	2018-06-21
AnnexinV+	19.3	805	rhodopsin-GFP	siDR5	AnnexinV-647	2018-06-27
AnnexinV+	0	0	rhodopsin-GFP	siDR5	unstained	2018-06-27
GFP-	39.6	886	proinsulin-GFP	non-targeting	AnnexinV-647	2018-06-27
GFP-	27.2	1152	proinsulin-GFP	non-targeting	unstained	2018-06-21
GFP-	26.6	1409	proinsulin-GFP	non-targeting	unstained	2018-06-21
GFP-	34.3	196	proinsulin-GFP	non-targeting	unstained	2018-06-27
GFP-	27.5	1964	proinsulin-GFP	siDR5	unstained	2018-06-21
GFP-	27.2	1368	proinsulin-GFP	siDR5	unstained	2018-06-21
GFP-	33.6	1164	proinsulin-GFP	siDR5	AnnexinV-647	2018-06-27
GFP-	34.1	777	proinsulin-GFP	siDR5	unstained	2018-06-27
GFP-	26.9	817	rhodopsin-GFP	non-targeting	AnnexinV-647	2018-06-27
GFP-	25.4	1512	rhodopsin-GFP	non-targeting	unstained	2018-06-21
GFP-	27.8	1228	rhodopsin-GFP	non-targeting	unstained	2018-06-21
GFP-	24	1097	rhodopsin-GFP	non-targeting	unstained	2018-06-21
GFP-	27.6	515	rhodopsin-GFP	non-targeting	unstained	2018-06-27
GFP-	24.4	1849	rhodopsin-GFP	siDR5	unstained	2018-06-21
GFP-	22.3	1063	rhodopsin-GFP	siDR5	unstained	2018-06-21
GFP-	30.8	1284	rhodopsin-GFP	siDR5	AnnexinV-647	2018-06-27
GFP-	33.8	905	rhodopsin-GFP	siDR5	unstained	2018-06-27
GFP+	72.8	3090	proinsulin-GFP	non-targeting	AnnexinV-647	2018-06-21
GFP+	73.4	3885	proinsulin-GFP	non-targeting	AnnexinV-647	2018-06-21
GFP+	60.4	1349	proinsulin-GFP	non-targeting	AnnexinV-647	2018-06-27
GFP+	65.7	375	proinsulin-GFP	non-targeting	unstained	2018-06-27
GFP+	72.5	5188	proinsulin-GFP	siDR5	AnnexinV-647	2018-06-21
GFP+	72.8	3670	proinsulin-GFP	siDR5	AnnexinV-647	2018-06-21
GFP+	66.4	2299	proinsulin-GFP	siDR5	AnnexinV-647	2018-06-27
GFP+	65.9	1499	proinsulin-GFP	siDR5	unstained	2018-06-27
GFP+	74.6	4445	rhodopsin-GFP	non-targeting	AnnexinV-647	2018-06-21
GFP+	72.2	3193	rhodopsin-GFP	non-targeting	AnnexinV-647	2018-06-21
GFP+	76	3472	rhodopsin-GFP	non-targeting	AnnexinV-647	2018-06-21
GFP+	73.1	2224	rhodopsin-GFP	non-targeting	AnnexinV-647	2018-06-27
GFP+	72.4	1354	rhodopsin-GFP	non-targeting	unstained	2018-06-27
GFP+	75.6	5722	rhodopsin-GFP	siDR5	AnnexinV-647	2018-06-21
GFP+	77.7	3703	rhodopsin-GFP	siDR5	AnnexinV-647	2018-06-21
GFP+	69.2	2882	rhodopsin-GFP	siDR5	AnnexinV-647	2018-06-27
GFP+	66.2	1771	rhodopsin-GFP	siDR5	unstained	2018-06-27

## Sheet: Prism T-tests
Table Analyzed	RHO	INS
Column B	siDR5	siDR5
vs.	vs.	vs.
Column A	siNt	siNt
Unpaired t test
P value	0.0109	0.005
P value summary	*	**
Significantly different? (P < 0.05)	Yes	Yes
One- or two-tailed P value?	Two-tailed	Two-tailed
t, df	t=4.5 df=4	t=5.6 df=4
How big is the difference?
Mean ± SEM of column A	33 ± 3.0 N=3	35 ± 2.4 N=3
Mean ± SEM of column B	19 ± 0.033 N=3	19 ± 1.7 N=3
Difference between means	-13 ± 3.0	-17 ± 2.9
95% confidence interval	-22 to -5.1	-25 to -8.3
R square	0.83	0.89
F test to compare variances
F,DFn, Dfd	7959, 2, 2	1.9, 2, 2
P value	0.0003	0.6977
P value summary	***	ns
Significantly different? (P < 0.05)	Yes	No
