# Supplementary material for: Misfolded proteins bind and activate death receptor 5 to trigger apoptosis during unresolved endoplasmic reticulum stress
Source: eLife journal article supplement (doi:10.7554/elife.52291), 2020-01-06
Supplement: fig1-data9 [file Source Data C8 Glo GFP vs INS vs RHO inputs.xlsx]

## Sheet: lysate RLUs rep 1
##BLOCKS= 1
Plate:	Plate01	1.3	PlateFormat	Endpoint	Luminescence	Raw	FALSE	1						1	0	1	24	384						1	Automatic			10	2	None
	Temperature(¡C)	1	2	3	4	5	6	7	8	9	10	11	12	13	14	15	16	17	18	19	20	21	22	23	24
	23
		0.1	0.05	0.025	0.0125	0.1	0.05	0.025	0.0125	0.1	0.05	0.025	0.0125	0.1	0.05	0.025	0.0125	0.1	0.05	0.025	0.0125	0.1	0.05	0.025	0.0125
		empty				empty +Tg				INS1-GFP siNt				INS1-GFP siDR5				RHO-GFP siNt				RHO-GFP siDR5				RHO-GFP siNt				RHO-GFP siDR5
	HCT116	2804.47	1557.73	638.922	370.349	6196.98	3327.48	1455.95	797.239	3449.05	1605.79	805.72	441.026	2281.46	1054.5	531.493	302.499	5142.48	2615.06	1300.46	647.403	2148.59	1000.79	537.147	231.821
	H460	1419.2	788.758	313.807	212.032	5478.9	2716.83	1362.66	718.081	2086.39	1077.12	684.156	282.709	712.427	313.807	195.069	104.602	992.308	443.853	212.032	118.738	22.617	5.654	16.963	0
		0.1	0.05	0.025	0.0125	0.1	0.05	0.025	0.0125	0.1	0.05	0.025	0.0125	0.1	0.05	0.025	0.0125	0.1	0.05	0.025	0.0125	blank
		empty				empty +Tg				MPZ-GFP siNt				mpz-GFP siDR5				cyto-GFP siNt
~End
		0.1	0.05	0.025	0.0125	0.1	0.05	0.025	0.0125	0.1	0.05	0.025	0.0125	0.1	0.05	0.025	0.0125	0.1	0.05	0.025	0.0125	0.1	0.05	0.025	0.0125
		empty				empty +Tg				INS1-GFP siNt				INS1-GFP siDR5				RHO-GFP siNt				RHO-GFP siDR5
	HCT116	2804.47	1557.73	638.922	370.349	6196.98	3327.48	1455.95	797.239	3449.05	1605.79	805.72	441.026	2281.46	1054.5	531.493	302.499	5142.48	2615.06	1300.46	647.403	2148.59	1000.79	537.147	231.821
	norm factor	1	1	1	1	1.23918	1.23918	1.23918	1.23918	0.588692	0.588692	0.588692	0.588692	0.515059	0.515059	0.515059	0.515059	0.602736	0.602736	0.602736	0.602736	0.522834	0.522834	0.522834	0.522834
	norm RLUs	2804.47	1557.73	638.922	370.349	5000.86	2685.23	1174.93	643.359	5858.83	2727.72	1368.66	749.162	4429.51	2047.35	1031.91	587.309	8531.89	4338.65	2157.6	1074.11	4109.5	1914.16	1027.38	443.393
		RLUs
	dilution	empty	empty + Tg	INS1 siNT	INS1 siDR5	RHO siNT	RHO siDR5
	0.1	2804.47	5000.86	5858.83	4429.51	8531.89	4109.5
	0.05	1557.73	2685.23	2727.72	2047.35	4338.65	1914.16
	0.025	638.922	1174.93	1368.66	1031.91	2157.6	1027.38
	0.0125	370.349	643.359	749.162	587.309	1074.11	443.393
		fold change relative to empty
	dilution	empty	empty + Tg	INS1 siNT	INS1 siDR5	RHO siNT	RHO siDR5
	0.1	1	1.78317	2.0891	1.57945	3.04224	1.46534
	0.05	1	1.72381	1.75109	1.31432	2.78524	1.22882
	0.025	1	1.83892	2.14214	1.61507	3.37693	1.60798
	0.0125	1	1.73717	2.02285	1.58583	2.90026	1.19723
	average fold change	1	1.77077	2.0013	1.52367	3.02617	1.37484
	st dev	0	0.052067	0.173796	0.140425	0.25638	0.19614
		fold change relative to empty
	dilution	empty	RHO siNT	RHO siDR5	INS1 siNT	INS1 siDR5
	0.1	1	3.04224	1.46534	2.0891	1.57945
	0.05	1	2.78524	1.22882	1.75109	1.31432
	0.025	1	3.37693	1.60798	2.14214	1.61507
	0.0125	1	2.90026	1.19723	2.02285	1.58583
	average fold change	1	3.02617	1.37484	2.0013	1.52367
	st dev	0	0.25638	0.19614	0.173796	0.140425
		fold change relative to empty
	dilution	empty	Rhodopsin-GFP	proinsulin-GFP
	0.1	1	3.04224	2.0891
	0.05	1	2.78524	1.75109
	0.025	1	3.37693	2.14214
	0.0125	1	2.90026	2.02285
	average fold change	1	3.02617	2.0013
	st dev	0	0.25638	0.173796

## Sheet: lysate quant rep 1
ROI	Label	Area	IntDen	RawIntDen	bg subtracted	norm factor to empty
1	2018-08-14 SyproRuby HCT RHO INS Caspase glo 8 lysate quant.tif:HCT empty	0.095	1859.24	95506130	65352930	1
2	2018-08-14 SyproRuby HCT RHO INS Caspase glo 8 lysate quant.tif:HCT empty Tg	0.095	2163.53	111137368	80984168	1.23918
3	2018-08-14 SyproRuby HCT RHO INS Caspase glo 8 lysate quant.tif:HCT RHO siNT	0.095	1335.95	68625960	38472760	0.588692
4	2018-08-14 SyproRuby HCT RHO INS Caspase glo 8 lysate quant.tif:HCT RHO siDR5	0.095	1242.28	63813822	33660622	0.515059
5	2018-08-14 SyproRuby HCT RHO INS Caspase glo 8 lysate quant.tif:HCT INS1 siNT	0.095	1353.82	69543756	39390556	0.602736
6	2018-08-14 SyproRuby HCT RHO INS Caspase glo 8 lysate quant.tif:HCT INS1 siDR5	0.095	1252.17	64321925	34168725	0.522834
7	2018-08-14 SyproRuby HCT RHO INS Caspase glo 8 lysate quant.tif:background	0.095	586.998	30153200

## Sheet: lysate RLUs rep 2
##BLOCKS= 1
Plate:	Plate01	1.3	PlateFormat	Endpoint	Luminescence	Raw	FALSE	1						1	0	1	24	384						1	Automatic			14	1	None
	Temperature(°C)	1	2	3	4	5	6	7	8	9	10	11	12	13	14	15	16	17	18	19	20	21	22	23	24
	23.1
	Sample
	Replicate														cytoGFP input 1x10	cytoGFP input 1x20	cytoGFP input 1x40	insGFP input 1x10	insGFP input 1x20	insGFP input 1x40	RHOGFP input 1x10	RHOGFP input 1x20	RHOGFP input 1x40
															3059.26	1311.51	793.663	5690.73	2516.08	1258.04	5336.11	2341.59	1016
														norm factor from lysate quant	1	1	1	0.688545	0.688545	0.688545	0.504528	0.504528	0.504528
														norm RLUs	3059.26	1311.51	793.663	8264.86	3654.19	1827.1	10576.5	4641.15	2013.77
~End
																		fold change relative to GFP
														dilution	GFP	INS	RHO	GFP	INS	RHO
														0.1	3059.26	8264.86	10576.5	1	2.70159	3.4572
														0.05	1311.51	3654.19	4641.15	1	2.78624	3.53877
														0.025	793.663	1827.1	2013.77	1	2.30211	2.53731
																	average fold change	1	2.59665	3.17776

## Sheet: lysate quant rep 2
		Area	mean	intden	rawintden	bg subtracted	norm factor	construct
1	GFP	0.028	43427.4	1216.2	57932190	6167576	1	GFP
2	INS	0.028	41987.5	1175.87	56011270	4246656	0.688545	INS
3	RHO	0.028	41136.7	1152.05	54876326	3111712	0.504528	RHO
4	background	0.028	38804.1	1086.72	51764614	0

## Sheet: compiled
	GFP	INS	RHO
Rep1	1	2.59665	3.17776
Rep2	1	2.0013	3.02617
avg fold change	1	2.29897	3.10196
sem	0	0.297674	0.075795

## Sheet: Unpaired t tests
Table Analyzed	Data 1	Data 1
Column C	RHO	INS
vs.	vs.	vs.
Column A	GFP	GFP
Unpaired t test
P value	0.0013	0.0487
P value summary	**	*
Significantly different? (P < 0.05)	Yes	Yes
One- or two-tailed P value?	Two-tailed	Two-tailed
t, df	t=27.73 df=2	t=4.364 df=2
How big is the difference?
Mean ± SEM of column A	1.000 ± 0.0, n=2	1.000 ± 0.0, n=2
Mean ± SEM of column C	3.102 ± 0.07579, n=2	2.299 ± 0.2977, n=2
Difference between means	2.102 ± 0.07579	1.299 ± 0.2977
95% confidence interval	1.776 to 2.428	0.01818 to 2.580
R squared	0.9974	0.905
F test to compare variances
F,DFn, Dfd
P value
P value summary
Significantly different? (P < 0.05)
