# Supplementary material for: Misfolded proteins bind and activate death receptor 5 to trigger apoptosis during unresolved endoplasmic reticulum stress
Source: eLife journal article supplement (doi:10.7554/elife.52291), 2020-01-06
Supplement: fig1-data9 [file Source Data C8 Glo GFP vs INS vs RHO IP.xlsx]

## Sheet: GFPTrap beads RLUs
##BLOCKS= 1
Plate:	Plate01	1.3	PlateFormat	Endpoint	Luminescence	Raw	FALSE	1						1	0	1	24	384						1	Automatic			14	1	None
	Temperature(°C)	1	2	3	4	5	6	7	8	9	10	11	12	13	14	15	16	17	18	19	20	21	22	23	24
	23.1
	Sample	cytoGFP beads	cytoGFP beads	cytoGFP beads	RHO-GFP beads	RHO-GFP beads	RHO-GFP beads	INS-GFP beads	INS-GFP beads	INS-GFP beads	blank	blank	blank
	Replicate	1	2	3	1	2	3	1	2	3
		64.731	70.36	75.989	329.286	320.842	371.502	115.391	47.845	95.69	5.629	2.814	59.103
	average RLUs for GFP	70.36
~End		fold change relative to GFP
	Data point	GFP	INS	RHO
	Rep 1	0.919997	1.64001	4.68002
	Rep 2	1	0.680003	4.56001
	Rep 3	1.08	1.36001	5.28002
	average fold change	1	1.50001	4.84001
	st dev	0.0800028	0.197992	0.38575
	sem	0.0461897	0.140001	0.222713

## Sheet: unpaired t tests
Table Analyzed	Data 3	Data 3
Column B	INS	RHO
vs.	vs.	vs.
Column A	GFP	GFP
Unpaired t test
P value	0.0253	< 0.0001
P value summary	*	****
Significantly different? (P < 0.05)	Yes	Yes
One- or two-tailed P value?	Two-tailed	Two-tailed
t, df	t=4.160 df=3	t=16.88 df=4
How big is the difference?
Mean ± SEM of column A	1.000 ± 0.04619, n=3	1.000 ± 0.04619, n=3
Mean ± SEM of column B	1.500 ± 0.1400, n=2	4.840 ± 0.2227, n=3
Difference between means	0.5000 ± 0.1202	3.840 ± 0.2275
95% confidence interval	0.1175 to 0.8825	3.209 to 4.472
R squared	0.8523	0.9862
F test to compare variances
F,DFn, Dfd		23.25, 2, 2
P value		0.0825
P value summary		ns
Significantly different? (P < 0.05)		No
