# Supplementary material for: Misfolded proteins bind and activate death receptor 5 to trigger apoptosis during unresolved endoplasmic reticulum stress
Source: eLife journal article supplement (doi:10.7554/elife.52291), 2020-01-06
Supplement: fig4-data1 [file Source Data Fig 4S3A Quantification of MPZ-ecto peptide GFP IP.xlsx]

## Sheet: Rep 1
DR5	sample	construct	area	mean	int den	raw int den	background subtracted		sample	input (*dilution factor)	beads (*diluton factor)	fraction IP'ed
	input	MPZ-ectoYtoE peptide	0.048	26814.9	1287.56	18877676	14658920		MPZ-ectoYtoE peptide	146589200	4131664	0.0281853
	input	MPZ-ectoAromtoE peptide	0.048	20734.9	995.623	14597384	10378628		MPZ-ectoAromtoE peptide	103786280	3356592	0.0323414
	input	MPZ-ecto peptide	0.048	25442.9	1221.68	17911800	13693044		MPZ-ecto peptide	136930440	10106176	0.0738052
	beads	MPZ-ectoYtoE peptide	0.048	7459.76	358.193	5251672	1032916
	beads	MPZ-ectoAromtoE peptide	0.048	7184.52	344.977	5057904	839148
	beads	MPZ-ecto peptide	0.048	9581.39	460.067	6745300	2526544
		background	0.048	5992.55	287.743	4218756
calculation of dilution factor:	ul incubated with beads	ul mixed with sample buffer (40 ul total)	ul loaded onto gel	dilution factor
input	250	30	25	0.1
calculation of dilution factor:	ul of sample buffer incubated with beads for elution	ul of sample buffer recovered after removal of beads	ul loaded onto gel
beads	50	35	12.5	0.25

## Sheet: Rep 2
sample	construct	area	mean	int den	raw int den	background subtracted		sample	input (*dilution factor)	beads (*dilution factor)	fraction IP'ed
input	GFP	0.06	4437.04	265.664	4117574	3436615		GFP	34366150	300988	0.00875827
input	MPZ-ecto peptide	0.06	7695.88	460.783	7141773	6460814		MPZ-ecto peptide	64608140	5226200	0.0808907
input	MPZ-ectoYtoE peptide	0.06	8541.66	511.424	7926661	7245702		MPZ-ectoYtoE peptide	72457020	1892980	0.0261256
input	MPZ-ectoAromtoE peptide	0.06	8364.02	500.788	7761809	7080850		MPZ-ectoAromtoE peptide	70808500	529608	0.00747944
beads	GFP	0.06	814.877	48.79	756206	75247
beads	MPZ-ecto peptide	0.06	2141.71	128.233	1987509	1306550
beads	MPZ-ectoYtoE peptide	0.06	1243.75	74.469	1154204	473245
beads	MPZ-ectoAromtoE peptide	0.06	876.467	52.478	813361	132402
background		0.06	733.792	43.935	680959
calculation of dilution factor:	ul incubated with beads	ul mixed with sample buffer (40 ul total)	ul loaded onto gel	dilution factor
input	250	30	25	0.1
calculation of dilution factor:	ul of sample buffer incubated with beads for elution	ul of sample buffer recovered after removal of beads	ul loaded onto gel
beads	50	35	12.5	0.25

## Sheet: Compiled
	Rep 1		Rep 2		fraction IP'ed
sample	input (*dilution factor)	beads (*diluton factor)	input (*dilution factor)	beads (*diluton factor)	Rep 1	Rep 2	average	SEM	% IP'ed
GFP			34366150	300988	-	0.00875827			average	SEM
MPZ-ecto peptide	136930440	10106176	64608140	5226200	0.0738052	0.0808907	0.077348	0.00354278	7.7348	0.354278
MPZ-ectoYtoE peptide	146589200	4131664	72457020	1892980	0.0281853	0.0261256	0.0271554	0.00102988	2.71554	0.102988
MPZ-ectoAromtoE peptide	103786280	3356592	70808500	529608	0.0323414	0.00747944	0.0199104	0.012431	1.99104	1.2431
calculation of dilution factor:	ul incubated with beads	ul mixed with sample buffer (40 ul total)	ul loaded onto gel	dilution factor
input	250	30	25	0.1
calculation of dilution factor:	ul of sample buffer incubated with beads for elution	ul of sample buffer recovered after removal of beads	ul loaded onto gel
beads	50	35	12.5	0.25
GFP
MPZ-ecto peptide	0.0738052	0.0808907
MPZ-ectoYtoE peptide	0.0281853	0.0261256
MPZ-ectoAromtoE peptide	0.0323414	0.00747944

## Sheet: Unpaired t test
Table Analyzed
Column B	MPZ-ectoYtoE peptide	MPZ-ectoAromtoE peptide	MPZ-ectoAromtoE peptide
vs.	vs.	vs.	vs.
Column A	MPZ-ecto peptide	MPZ-ecto peptide	MPZ-ectoYtoE peptide
Unpaired t test
P value	0.0054	0.0471	0.6201
P value summary	**	*	ns
Significantly different? (P < 0.05)	Yes	Yes	No
One- or two-tailed P value?	Two-tailed	Two-tailed	Two-tailed
t, df	t=13.60 df=2	t=4.444 df=2	t=0.5808 df=2
How big is the difference?
Mean ± SEM of column A	0.07735 ± 0.003543, n=2	0.07735 ± 0.003543, n=2	0.02716 ± 0.001030, n=2
Mean ± SEM of column B	0.02716 ± 0.001030, n=2	0.01991 ± 0.01243, n=2	0.01991 ± 0.01243, n=2
Difference between means	-0.05019 ± 0.003689	-0.05744 ± 0.01293	-0.007245 ± 0.01247
95% confidence interval	-0.06607 to -0.03432	-0.1131 to -0.001822	-0.06091 to 0.04642
R squared	0.9893	0.908	0.1443
F test to compare variances
F,DFn, Dfd
P value
P value summary
Significantly different? (P < 0.05)
