# Supplementary material for: Misfolded proteins bind and activate death receptor 5 to trigger apoptosis during unresolved endoplasmic reticulum stress
Source: eLife journal article supplement (doi:10.7554/elife.52291), 2020-01-06
Supplement: fig4-data2 [file Source Data Fig 4C C8 glo HCT116 ecto peptides.xlsx]

## Sheet: Rep 1
##BLOCKS= 1																											sample	dilution of lysate	RLUs	norm value	norm RLUs	fold change relative to empty	fold change relative to empty for norm RLUs		sample	dilution of lysate	RLUs	norm value	norm RLUs	fold change relative to empty	fold change relative to empty for norm RLUs	average fold change	st dev		sample	average fold change	st dev
Plate:	Plate01	1.3	PlateFormat	Endpoint	Luminescence	Raw	FALSE	1						1	0	1	24	384						1	Automatic		ecto ArtoE peptide-GFP 100 ng	0.1	266.647	0.913008	243.451	1	0.913008		ecto ArtoE peptide-GFP 100 ng	0.1	266.647	0.913008	243.451	1	0.913008	0.805597	0.252858		MPZ-GFP	2.82731	0.448137
	Temperature(¡C)	1	2	3	4	5	6	7	8	9	10	11	12	13	14	15	16	17	18	19	20	21	22	23	24		ecto ArtoE peptide-GFP 200 ng	0.1	326.858	1.0569	345.457	1.22581	1.29556		ecto ArtoE peptide-GFP 100 ng	0.05	111.82	0.913008	102.093	1.14706	1.04728				GFP	1	0
	22.8																										ecto ArtoE peptide-GFP 400 ng	0.1	301.053	1.1211	337.51	1.12903	1.26576		ecto ArtoE peptide-GFP 100 ng	0.025	37.273	0.913008	34.0305	0.5	0.456504				ecto peptide-GFP 100 ng	1.475	0.72854
																											ecto peptide-GFP 100 ng	0.1	366.998	1.35375	496.825	1.37634	1.86323		ecto ArtoE peptide-GFP 100 ng	0.0125	43.008	0.913008	39.2666	0.88236	0.805602				ecto peptide-GFP 200 ng	1.43265	0.190664
																											ecto peptide-GFP 200 ng	0.1	275.249	1.43082	393.832	1.03226	1.47698		ecto ArtoE peptide-GFP 200 ng	0.1	326.858	1.0569	345.457	1.22581	1.29556	1.00896	0.394119		ecto peptide-GFP 400 ng	2.59962	0.490162
																											ecto peptide-GFP 400 ng	0.1	570.567	1.24732	711.681	2.13978	2.669		ecto ArtoE peptide-GFP 200 ng	0.05	83.148	1.0569	87.8793	0.85294	0.901474				ecto YtoE peptide-GFP 100 ng	0.601913	0.149718
																											ecto YtoE peptide-GFP 100 ng	0.1	197.835	1.09716	217.057	0.741936	0.814024		ecto ArtoE peptide-GFP 200 ng	0.025	94.617	1.0569	100.001	1.26924	1.34147				ecto YtoE peptide-GFP 200 ng	1.17056	0.240768
																											ecto YtoE peptide-GFP 200 ng	0.1	292.452	1.08708	317.917	1.09678	1.19228		ecto ArtoE peptide-GFP 200 ng	0.0125	22.937	1.0569	24.2422	0.47058	0.497357				ecto YtoE peptide-GFP 400 ng	1.52747	0.30572
																											ecto YtoE peptide-GFP 400 ng	0.1	490.286	1.05875	519.092	1.83871	1.94674		ecto ArtoE peptide-GFP 400 ng	0.1	301.053	1.1211	337.51	1.12903	1.26576	1.20863	0.218244		ecto ArtoE peptide-GFP 100 ng	0.805597	0.252858
																											GFP	0.1	266.647	1	266.647	1	1		ecto ArtoE peptide-GFP 400 ng	0.05	77.414	1.1211	86.7887	0.79412	0.890287				ecto ArtoE peptide-GFP 200 ng	1.00896	0.394119
	sample	+100 nM Tg	+100 nM Tg	GFP	GFP	MPZ-GFP	MPZ-GFP	ecto peptide-GFP 100 ng	ecto peptide-GFP 100 ng	ecto peptide-GFP 200 ng	ecto peptide-GFP 200 ng	ecto peptide-GFP 400 ng	ecto peptide-GFP 400 ng	ecto ArtoE peptide-GFP 100 ng	ecto ArtoE peptide-GFP 100 ng	ecto ArtoE peptide-GFP 200 ng	ecto ArtoE peptide-GFP 200 ng	ecto ArtoE peptide-GFP 400 ng	ecto ArtoE peptide-GFP 400 ng	ecto YtoE peptide-GFP 100 ng	ecto YtoE peptide-GFP 100 ng	ecto YtoE peptide-GFP 200 ng	ecto YtoE peptide-GFP 200 ng	ecto YtoE peptide-GFP 400 ng	ecto YtoE peptide-GFP 400 ng		MPZ-GFP	0.1	524.693	1.54866	812.573	1.96774	3.04737		ecto ArtoE peptide-GFP 400 ng	0.025	86.015	1.1211	96.4313	1.15385	1.29358				ecto ArtoE peptide-GFP 400 ng	1.20863	0.218244
	dilution of lysate	0.1	0.05	0.1	0.05	0.1	0.05	0.1	0.05	0.1	0.05	0.1	0.05	0.1	0.05	0.1	0.05	0.1	0.05	0.1	0.05	0.1	0.05	0.1	0.05		ecto ArtoE peptide-GFP 100 ng	0.05	111.82	0.913008	102.093	1.14706	1.04728		ecto ArtoE peptide-GFP 400 ng	0.0125	60.211	1.1211	67.5025	1.2353	1.38489
	RLUs	2396.96	854.417	266.647	97.484	524.693	203.569	366.998	88.882	275.249	88.882	570.567	160.562	266.647	111.82	326.858	83.148	301.053	77.414	197.835	48.742	292.452	111.82	490.286	126.156		ecto ArtoE peptide-GFP 200 ng	0.05	83.148	1.0569	87.8793	0.85294	0.901474		ecto peptide-GFP 100 ng	0.1	366.998	1.35375	496.825	1.37634	1.86323	1.475	0.72854
	RLUs	447.279	361.264	74.546	48.742	106.085	88.882	31.539	80.281	65.945	57.343	146.226	126.156	37.273	43.008	94.617	22.937	86.015	60.211	31.539	25.805	57.343	63.078	108.953	57.343		ecto ArtoE peptide-GFP 400 ng	0.05	77.414	1.1211	86.7887	0.79412	0.890287		ecto peptide-GFP 100 ng	0.05	88.882	1.35375	120.324	0.91176	1.2343
	dilution	0.025	0.0125	0.025	0.0125	0.025	0.0125	0.025	0.0125	0.025	0.0125	0.025	0.0125	0.025	0.0125	0.025	0.0125	0.025	0.0125	0.025	0.0125	0.025	0.0125	0.025	0.0125		ecto peptide-GFP 100 ng	0.05	88.882	1.35375	120.324	0.91176	1.2343		ecto peptide-GFP 100 ng	0.025	31.539	1.35375	42.696	0.423081	0.572747
	sample	+100 nM Tg	+100 nM Tg	GFP	GFP	MPZ-GFP	MPZ-GFP	ecto peptide-GFP 100 ng	ecto peptide-GFP 100 ng	ecto peptide-GFP 200 ng	ecto peptide-GFP 200 ng	ecto peptide-GFP 400 ng	ecto peptide-GFP 400 ng	ecto ArtoE peptide-GFP 100 ng	ecto ArtoE peptide-GFP 100 ng	ecto ArtoE peptide-GFP 200 ng	ecto ArtoE peptide-GFP 200 ng	ecto ArtoE peptide-GFP 400 ng	ecto ArtoE peptide-GFP 400 ng	ecto YtoE peptide-GFP 100 ng	ecto YtoE peptide-GFP 100 ng	ecto YtoE peptide-GFP 200 ng	ecto YtoE peptide-GFP 200 ng	ecto YtoE peptide-GFP 400 ng	ecto YtoE peptide-GFP 400 ng		ecto peptide-GFP 200 ng	0.05	88.882	1.43082	127.174	0.91176	1.30456		ecto peptide-GFP 100 ng	0.0125	80.281	1.35375	108.681	1.64706	2.22971
	norm value			1	1	1.54866	1.54866	1.35375	1.35375	1.43082	1.43082	1.24732	1.24732	0.913008	0.913008	1.0569	1.0569	1.1211	1.1211	1.09716	1.09716	1.08708	1.08708	1.05875	1.05875		ecto peptide-GFP 400 ng	0.05	160.562	1.24732	200.273	1.64706	2.05441		ecto peptide-GFP 200 ng	0.1	275.249	1.43082	393.832	1.03226	1.47698	1.43265	0.190664
																											ecto YtoE peptide-GFP 100 ng	0.05	48.742	1.09716	53.4779	0.5	0.548581		ecto peptide-GFP 200 ng	0.05	88.882	1.43082	127.174	0.91176	1.30456
																											ecto YtoE peptide-GFP 200 ng	0.05	111.82	1.08708	121.557	1.14706	1.24694		ecto peptide-GFP 200 ng	0.025	65.945	1.43082	94.3555	0.884622	1.26573
~End																											ecto YtoE peptide-GFP 400 ng	0.05	126.156	1.05875	133.568	1.29412	1.37015		ecto peptide-GFP 200 ng	0.0125	57.343	1.43082	82.0476	1.17646	1.6833
																											GFP	0.05	97.484	1	97.484	1	1		ecto peptide-GFP 400 ng	0.1	570.567	1.24732	711.681	2.13978	2.669	2.59962	0.490162
																											MPZ-GFP	0.05	203.569	1.54866	315.26	2.08823	3.23397		ecto peptide-GFP 400 ng	0.05	160.562	1.24732	200.273	1.64706	2.05441
																											ecto ArtoE peptide-GFP 100 ng	0.025	37.273	0.913008	34.0305	0.5	0.456504		ecto peptide-GFP 400 ng	0.025	146.226	1.24732	182.391	1.96155	2.44669
																											ecto ArtoE peptide-GFP 200 ng	0.025	94.617	1.0569	100.001	1.26924	1.34147		ecto peptide-GFP 400 ng	0.0125	126.156	1.24732	157.357	2.58824	3.22837
																											ecto ArtoE peptide-GFP 400 ng	0.025	86.015	1.1211	96.4313	1.15385	1.29358		ecto YtoE peptide-GFP 100 ng	0.1	197.835	1.09716	217.057	0.741936	0.814024	0.601913	0.149718
																											ecto peptide-GFP 100 ng	0.025	31.539	1.35375	42.696	0.423081	0.572747		ecto YtoE peptide-GFP 100 ng	0.05	48.742	1.09716	53.4779	0.5	0.548581
																											ecto peptide-GFP 200 ng	0.025	65.945	1.43082	94.3555	0.884622	1.26573		ecto YtoE peptide-GFP 100 ng	0.025	31.539	1.09716	34.6034	0.423081	0.464188
																											ecto peptide-GFP 400 ng	0.025	146.226	1.24732	182.391	1.96155	2.44669		ecto YtoE peptide-GFP 100 ng	0.0125	25.805	1.09716	28.3123	0.52942	0.58086
																											ecto YtoE peptide-GFP 100 ng	0.025	31.539	1.09716	34.6034	0.423081	0.464188		ecto YtoE peptide-GFP 200 ng	0.1	292.452	1.08708	317.917	1.09678	1.19228	1.17056	0.240768
																											ecto YtoE peptide-GFP 200 ng	0.025	57.343	1.08708	62.3362	0.76923	0.836211		ecto YtoE peptide-GFP 200 ng	0.05	111.82	1.08708	121.557	1.14706	1.24694
																											ecto YtoE peptide-GFP 400 ng	0.025	108.953	1.05875	115.354	1.46155	1.54742		ecto YtoE peptide-GFP 200 ng	0.025	57.343	1.08708	62.3362	0.76923	0.836211
																											GFP	0.025	74.546	1	74.546	1	1		ecto YtoE peptide-GFP 200 ng	0.0125	63.078	1.08708	68.5706	1.29412	1.40681
																											MPZ-GFP	0.025	106.085	1.54866	164.29	1.42308	2.20387		ecto YtoE peptide-GFP 400 ng	0.1	490.286	1.05875	519.092	1.83871	1.94674	1.52747	0.30572
																											ecto ArtoE peptide-GFP 100 ng	0.0125	43.008	0.913008	39.2666	0.88236	0.805602		ecto YtoE peptide-GFP 400 ng	0.05	126.156	1.05875	133.568	1.29412	1.37015
																											ecto ArtoE peptide-GFP 200 ng	0.0125	22.937	1.0569	24.2422	0.47058	0.497357		ecto YtoE peptide-GFP 400 ng	0.025	108.953	1.05875	115.354	1.46155	1.54742
																											ecto ArtoE peptide-GFP 400 ng	0.0125	60.211	1.1211	67.5025	1.2353	1.38489		ecto YtoE peptide-GFP 400 ng	0.0125	57.343	1.05875	60.7121	1.17646	1.24558
																											ecto peptide-GFP 100 ng	0.0125	80.281	1.35375	108.681	1.64706	2.22971		GFP	0.1	266.647	1	266.647	1	1	1	0
																											ecto peptide-GFP 200 ng	0.0125	57.343	1.43082	82.0476	1.17646	1.6833		GFP	0.05	97.484	1	97.484	1	1
																											ecto peptide-GFP 400 ng	0.0125	126.156	1.24732	157.357	2.58824	3.22837		GFP	0.025	74.546	1	74.546	1	1
																											ecto YtoE peptide-GFP 100 ng	0.0125	25.805	1.09716	28.3123	0.52942	0.58086		GFP	0.0125	48.742	1	48.742	1	1
																											ecto YtoE peptide-GFP 200 ng	0.0125	63.078	1.08708	68.5706	1.29412	1.40681		MPZ-GFP	0.1	524.693	1.54866	812.573	1.96774	3.04737	2.82731	0.448137
																											ecto YtoE peptide-GFP 400 ng	0.0125	57.343	1.05875	60.7121	1.17646	1.24558		MPZ-GFP	0.05	203.569	1.54866	315.26	2.08823	3.23397
																											GFP	0.0125	48.742	1	48.742	1	1		MPZ-GFP	0.025	106.085	1.54866	164.29	1.42308	2.20387
																											MPZ-GFP	0.0125	88.882	1.54866	137.648	1.82352	2.82402		MPZ-GFP	0.0125	88.882	1.54866	137.648	1.82352	2.82402

## Sheet: Rep 2 and 3
##BLOCKS= 1
Plate:	Plate01	1.3	PlateFormat	Endpoint	Luminescence	Raw	FALSE	1						1	0	1	24	384							1	Automatic			14	3	None
	Temperature(¡C)	1	2	3	4	5	6	7	8	9	10	11	12	13	14	15	16	17	18	19	20			21	23	24
	22.8
																				fold change relative to GFP							fold change relative to GFP		AVG fold change relative to GFP
																dilution		input - rep 2	input - rep 3	rep 2	Rep 3		dilution		input - rep 2	input - rep 3	rep 2	Rep 3	Rep 2	Rep 3
																0.025	HCT ecto	1023.77	1173.88	2.10369	1.82771		0.025	HCT ecto	1023.77	1173.88	2.10369	1.82771	2.18323	2.30937	HCT ecto
																0.025	HCT GFP	486.654	642.27	1	1		0.05	HCT ecto	2082.52	2324.65	2.52066	2.28861
																0.025	HCT ecto YYEE	638.456	758.718	1.31193	1.18131		0.1	HCT ecto	3486.42	4256.29	1.92534	2.81181
																0.025	HCT ecto Arom-to-E	623.695	615.428	1.2816	0.958208		0.025	HCT ecto Arom-to-E	623.695	615.428	1.2816	0.958208	1.3079	1.01315	HCT ecto Arom-to-E
		1x10	1x10	1x20	1x20	1x40	1x40	1x10	1x10	1x20	1x20	1x40	1x40			0.05	HCT ecto	2082.52	2324.65	2.52066	2.28861		0.05	HCT ecto Arom-to-E	1311.61	947.072	1.58756	0.932388
		HCT ecto	HCT GFP	HCT ecto	HCT GFP	HCT ecto	HCT GFP	HCT ecto YYEE	HCT ecto Arom-to-E	HCT ecto YYEE	HCT ecto Arom-to-E	HCT ecto YYEE	HCT ecto Arom-to-E			0.05	HCT GFP	826.18	1015.75	1	1		0.1	HCT ecto Arom-to-E	1909.55	1739.04	1.05453	1.14885
	input - rep 2	4229.93	1810.81	2526.64	826.18	1242.1	486.654	2164.48	1966.42	1351.56	1350.67	780.91	642.27			0.05	HCT ecto YYEE	1105.01	25.6869	1.33749	0.0252886		0.025	HCT ecto YYEE	638.456	758.718	1.31193	1.18131	1.20889	1.38663	HCT ecto YYEE
	input - rep 3	4688.29	1513.72	2560.59	1015.75	1293.03	642.27	2654.36	1844.36	28.294	1004.43	835.725	652.702			0.05	HCT ecto Arom-to-E	1311.61	947.072	1.58756	0.932388		0.05	HCT ecto YYEE	1105.01	25.6869	1.33749	0.0252886
	dilution	0.1	0.1	0.05	0.05	0.025	0.025	0.1	0.1	0.05	0.05	0.025	0.025			0.1	HCT ecto	3486.42	4256.29	1.92534	2.81181		0.1	HCT ecto YYEE	1769.63	2409.78	0.977263	1.59196
																0.1	HCT GFP	1810.81	1513.72	1	1		0.025	HCT GFP	486.654	642.27	1	1
~End	norm factor - rep 2	1.21326	1	1.21326	1	1.21326	1	1.22312	1.02978	1.22312	1.02978	1.22312	1.02978			0.1	HCT ecto YYEE	1769.63	2409.78	0.977263	1.59196		0.05	HCT GFP	826.18	1015.75	1	1
	norm factor - rep 3	1.1015	1	1.1015	1	1.1015	1	1.1015	1.06057	1.1015	1.06057	1.1015	1.06057			0.1	HCT ecto Arom-to-E	1909.55	1739.04	1.05453	1.14885		0.1	HCT GFP	1810.81	1513.72	1	1
	normalized RLUs rep 2	3486.42	1810.81	2082.52	826.18	1023.77	486.654	1769.63	1909.55	1105.01	1311.61	638.456	623.695
	normalized RLUs rep 3	4256.29	1513.72	2324.65	1015.75	1173.88	642.27	2409.78	1739.04	25.6869	947.072	758.718	615.428
		HCT ecto	HCT GFP	HCT ecto	HCT GFP	HCT ecto	HCT GFP	HCT ecto YYEE	HCT ecto Arom-to-E	HCT ecto YYEE	HCT ecto Arom-to-E	HCT ecto YYEE	HCT ecto Arom-to-E
		0.1	0.1	0.05	0.05	0.025	0.025	0.1	0.1	0.05	0.05	0.025	0.025

## Sheet: Coomassie quant rep 2 and 3
	Area	mean	IntDen	RawIntDen	bg corrected	norm factor relative to GFP	sample	Rep
1	0.019	22725.5	438.447	46132820	19305120	1	GFP	2
2	0.019	20697.4	399.319	42015808	23422132	1.21326	ecto peptide	2
3	0.019	20603.7	397.509	41825412	23612528	1.22312	ecto YtoE	2
4	0.019	22442.3	432.983	45557872	19880068	1.02978	ecto AromtoE	2
5	0.019	21445.9	413.76	43535260	21902680	1	GFP	3
6	0.019	20350.8	392.632	41312212	24125728	1.1015	ecto peptide	3
7	0.019	22176.1	427.847	45017476	20420464	0.932327	ecto YtoE	3
8	0.019	20792.5	401.152	42208716	23229224	1.06057	ecto AromtoE	3
background	0.019	32235.4	621.923	65437940

## Sheet: Compiled
		AVG (n = 3 tech reps) fold change relative to GFP			avg of n = 3 biol rep	SEM of n = 3
	sample	Rep 1	Rep 2	Rep 3
	HCT ecto (400 ng)	2.59962	2.18323	2.30937	2.36407	0.123273
	HCT ecto YYEE (200 ng)	1.20889	1.38663	1.52737	1.3743	0.0921423
	HCT ecto Arom-to-E (200 ng)	1.00896	1.3079	1.01315	1.11	0.0989543

## Sheet: t-test
Table Analyzed
Column B	HCT ecto YYEE (200 ng)	HCT ecto Arom-to-E (200 ng)	HCT ecto Arom-to-E (200 ng)
vs.	vs.	vs.	vs.
Column A	HCT ecto (400 ng)	HCT ecto (400 ng)	HCT ecto YYEE (200 ng)
Unpaired t test
P value	0.0005	0.0002	0.1776
P value summary	***	***	ns
Significantly different? (P < 0.05)	Yes	Yes	No
One- or two-tailed P value?	Two-tailed	Two-tailed	Two-tailed
t, df	t=10.41 df=4	t=13.49 df=4	t=1.634 df=4
How big is the difference?
Mean ± SEM of column A	2.597 ± 0.03035, n=3	2.597 ± 0.03035, n=3	1.392 ± 0.1117, n=3
Mean ± SEM of column B	1.392 ± 0.1117, n=3	1.143 ± 0.1034, n=3	1.143 ± 0.1034, n=3
Difference between means	-1.205 ± 0.1158	-1.454 ± 0.1078	-0.2487 ± 0.1522
95% confidence interval	-1.527 to -0.8838	-1.753 to -1.155	-0.6714 to 0.1740
R squared	0.9644	0.9785	0.4002
F test to compare variances
F,DFn, Dfd	13.55, 2, 2	11.62, 2, 2	1.166, 2, 2
P value	0.1375	0.1585	0.9234
P value summary	ns	ns	ns
Significantly different? (P < 0.05)	No	No	No
