# Supplementary material for: Misfolded proteins bind and activate death receptor 5 to trigger apoptosis during unresolved endoplasmic reticulum stress
Source: eLife journal article supplement (doi:10.7554/elife.52291), 2020-01-06
Supplement: fig4-data4 [file Source Data Fig 4H Annexin V MPZ-ecto peptides.xlsx]

## Sheet: 2019-11-21 Rep 1
Depth	Name		Statistic	#Cells	plasmid	stain			Depth	Name		Statistic	#Cells	plasmid	stain
	Specimen_001_A1_A01_001.fcs			50000	empty vector	Axn647 only			> > >	Specimen_001_A1_A01_001.fcs	APC-A-	90.2	20433	empty vector	Axn647 only
>	Specimen_001_A1_A01_001.fcs		82.1	41048	empty vector	Axn647 only			> > >	Specimen_001_A4_A04_004.fcs	APC-A-	63.7	17993	ecto peptide-GFP	Axn647 only
> >	Specimen_001_A1_A01_001.fcs		55.2	22659	empty vector	Axn647 only			> > >	Specimen_001_A5_A05_005.fcs	APC-A-	75.6	20429	ectoYtoE peptide-GFP	Axn647 only
> > >	Specimen_001_A1_A01_001.fcs	APC-A+	9.82	2226	empty vector	Axn647 only			> > >	Specimen_001_A6_A06_006.fcs	APC-A-	74.5	22744	ecto AromtoE peptide-GFP	Axn647 only
> > >	Specimen_001_A1_A01_001.fcs	APC-A-	90.2	20433	empty vector	Axn647 only			> > >	Specimen_001_C1_C01_013.fcs	APC-A-	100	22494	empty vector	unstained
> > >	Specimen_001_A1_A01_001.fcs	FITC-A+	0.42	96	empty vector	Axn647 only			> > >	Specimen_001_C4_C04_016.fcs	APC-A-	100	27993	ecto peptide-GFP	unstained
> > >	Specimen_001_A1_A01_001.fcs	FITC-A-	99.6	22563	empty vector	Axn647 only			> > >	Specimen_001_C5_C05_017.fcs	APC-A-	100	27373	ectoYtoE peptide-GFP	unstained
	Specimen_001_A4_A04_004.fcs			50000	ecto peptide-GFP	Axn647 only			> > >	Specimen_001_C6_C06_018.fcs	APC-A-	100	31503	ecto AromtoE peptide-GFP	unstained
>	Specimen_001_A4_A04_004.fcs		86.8	43409	ecto peptide-GFP	Axn647 only			> > >	Specimen_001_A1_A01_001.fcs	APC-A+	9.82	2226	empty vector	Axn647 only
> >	Specimen_001_A4_A04_004.fcs		65.1	28257	ecto peptide-GFP	Axn647 only			> > >	Specimen_001_A4_A04_004.fcs	APC-A+	36.3	10264	ecto peptide-GFP	Axn647 only
> > >	Specimen_001_A4_A04_004.fcs	APC-A+	36.3	10264	ecto peptide-GFP	Axn647 only			> > >	Specimen_001_A5_A05_005.fcs	APC-A+	24.4	6580	ectoYtoE peptide-GFP	Axn647 only
> > >	Specimen_001_A4_A04_004.fcs	APC-A-	63.7	17993	ecto peptide-GFP	Axn647 only			> > >	Specimen_001_A6_A06_006.fcs	APC-A+	25.5	7792	ecto AromtoE peptide-GFP	Axn647 only
> > >	Specimen_001_A4_A04_004.fcs	FITC-A+	47.9	13540	ecto peptide-GFP	Axn647 only			> > >	Specimen_001_C1_C01_013.fcs	APC-A+	0	0	empty vector	unstained
> > >	Specimen_001_A4_A04_004.fcs	FITC-A-	52.1	14717	ecto peptide-GFP	Axn647 only			> > >	Specimen_001_C4_C04_016.fcs	APC-A+	0	0	ecto peptide-GFP	unstained
	Specimen_001_A5_A05_005.fcs			50000	ectoYtoE peptide-GFP	Axn647 only			> > >	Specimen_001_C5_C05_017.fcs	APC-A+	0	0	ectoYtoE peptide-GFP	unstained
>	Specimen_001_A5_A05_005.fcs		85.3	42628	ectoYtoE peptide-GFP	Axn647 only			> > >	Specimen_001_C6_C06_018.fcs	APC-A+	0	0	ecto AromtoE peptide-GFP	unstained
> >	Specimen_001_A5_A05_005.fcs		63.4	27009	ectoYtoE peptide-GFP	Axn647 only			> > >	Specimen_001_A1_A01_001.fcs	FITC-A-	99.6	22563	empty vector	Axn647 only
> > >	Specimen_001_A5_A05_005.fcs	APC-A+	24.4	6580	ectoYtoE peptide-GFP	Axn647 only			> > >	Specimen_001_A4_A04_004.fcs	FITC-A-	52.1	14717	ecto peptide-GFP	Axn647 only
> > >	Specimen_001_A5_A05_005.fcs	APC-A-	75.6	20429	ectoYtoE peptide-GFP	Axn647 only			> > >	Specimen_001_A5_A05_005.fcs	FITC-A-	55	14860	ectoYtoE peptide-GFP	Axn647 only
> > >	Specimen_001_A5_A05_005.fcs	FITC-A+	45	12149	ectoYtoE peptide-GFP	Axn647 only			> > >	Specimen_001_A6_A06_006.fcs	FITC-A-	54.9	16754	ecto AromtoE peptide-GFP	Axn647 only
> > >	Specimen_001_A5_A05_005.fcs	FITC-A-	55	14860	ectoYtoE peptide-GFP	Axn647 only			> > >	Specimen_001_C1_C01_013.fcs	FITC-A-	99.8	22439	empty vector	unstained
	Specimen_001_A6_A06_006.fcs			50000	ecto AromtoE peptide-GFP	Axn647 only			> > >	Specimen_001_C4_C04_016.fcs	FITC-A-	53.3	14921	ecto peptide-GFP	unstained
>	Specimen_001_A6_A06_006.fcs		90.5	45244	ecto AromtoE peptide-GFP	Axn647 only			> > >	Specimen_001_C5_C05_017.fcs	FITC-A-	54.2	14831	ectoYtoE peptide-GFP	unstained
> >	Specimen_001_A6_A06_006.fcs		67.5	30536	ecto AromtoE peptide-GFP	Axn647 only			> > >	Specimen_001_C6_C06_018.fcs	FITC-A-	54.1	17028	ecto AromtoE peptide-GFP	unstained
> > >	Specimen_001_A6_A06_006.fcs	APC-A+	25.5	7792	ecto AromtoE peptide-GFP	Axn647 only			> > >	Specimen_001_A1_A01_001.fcs	FITC-A+	0.42	96	empty vector	Axn647 only
> > >	Specimen_001_A6_A06_006.fcs	APC-A-	74.5	22744	ecto AromtoE peptide-GFP	Axn647 only			> > >	Specimen_001_A4_A04_004.fcs	FITC-A+	47.9	13540	ecto peptide-GFP	Axn647 only
> > >	Specimen_001_A6_A06_006.fcs	FITC-A+	45.1	13782	ecto AromtoE peptide-GFP	Axn647 only			> > >	Specimen_001_A5_A05_005.fcs	FITC-A+	45	12149	ectoYtoE peptide-GFP	Axn647 only
> > >	Specimen_001_A6_A06_006.fcs	FITC-A-	54.9	16754	ecto AromtoE peptide-GFP	Axn647 only			> > >	Specimen_001_A6_A06_006.fcs	FITC-A+	45.1	13782	ecto AromtoE peptide-GFP	Axn647 only
	Specimen_001_C1_C01_013.fcs			50017	empty vector	unstained			> > >	Specimen_001_C1_C01_013.fcs	FITC-A+	0.24	55	empty vector	unstained
>	Specimen_001_C1_C01_013.fcs		82.7	41367	empty vector	unstained			> > >	Specimen_001_C4_C04_016.fcs	FITC-A+	46.7	13072	ecto peptide-GFP	unstained
> >	Specimen_001_C1_C01_013.fcs		54.4	22494	empty vector	unstained			> > >	Specimen_001_C5_C05_017.fcs	FITC-A+	45.8	12542	ectoYtoE peptide-GFP	unstained
> > >	Specimen_001_C1_C01_013.fcs	APC-A+	0	0	empty vector	unstained			> > >	Specimen_001_C6_C06_018.fcs	FITC-A+	45.9	14475	ecto AromtoE peptide-GFP	unstained
> > >	Specimen_001_C1_C01_013.fcs	APC-A-	100	22494	empty vector	unstained
> > >	Specimen_001_C1_C01_013.fcs	FITC-A+	0.24	55	empty vector	unstained
> > >	Specimen_001_C1_C01_013.fcs	FITC-A-	99.8	22439	empty vector	unstained
	Specimen_001_C4_C04_016.fcs			50008	ecto peptide-GFP	unstained
>	Specimen_001_C4_C04_016.fcs		86.5	43248	ecto peptide-GFP	unstained
> >	Specimen_001_C4_C04_016.fcs		64.7	27993	ecto peptide-GFP	unstained
> > >	Specimen_001_C4_C04_016.fcs	APC-A+	0	0	ecto peptide-GFP	unstained
> > >	Specimen_001_C4_C04_016.fcs	APC-A-	100	27993	ecto peptide-GFP	unstained
> > >	Specimen_001_C4_C04_016.fcs	FITC-A+	46.7	13072	ecto peptide-GFP	unstained
> > >	Specimen_001_C4_C04_016.fcs	FITC-A-	53.3	14921	ecto peptide-GFP	unstained
	Specimen_001_C5_C05_017.fcs			50000	ectoYtoE peptide-GFP	unstained
>	Specimen_001_C5_C05_017.fcs		86.8	43396	ectoYtoE peptide-GFP	unstained
> >	Specimen_001_C5_C05_017.fcs		63.1	27373	ectoYtoE peptide-GFP	unstained
> > >	Specimen_001_C5_C05_017.fcs	APC-A+	0	0	ectoYtoE peptide-GFP	unstained
> > >	Specimen_001_C5_C05_017.fcs	APC-A-	100	27373	ectoYtoE peptide-GFP	unstained
> > >	Specimen_001_C5_C05_017.fcs	FITC-A+	45.8	12542	ectoYtoE peptide-GFP	unstained
> > >	Specimen_001_C5_C05_017.fcs	FITC-A-	54.2	14831	ectoYtoE peptide-GFP	unstained
	Specimen_001_C6_C06_018.fcs			50007	ecto AromtoE peptide-GFP	unstained
>	Specimen_001_C6_C06_018.fcs		91	45492	ecto AromtoE peptide-GFP	unstained
> >	Specimen_001_C6_C06_018.fcs		69.2	31503	ecto AromtoE peptide-GFP	unstained
> > >	Specimen_001_C6_C06_018.fcs	APC-A+	0	0	ecto AromtoE peptide-GFP	unstained
> > >	Specimen_001_C6_C06_018.fcs	APC-A-	100	31503	ecto AromtoE peptide-GFP	unstained
> > >	Specimen_001_C6_C06_018.fcs	FITC-A+	45.9	14475	ecto AromtoE peptide-GFP	unstained
> > >	Specimen_001_C6_C06_018.fcs	FITC-A-	54.1	17028	ecto AromtoE peptide-GFP	unstained

## Sheet: 2019-11-22 Rep 2 and 3
Depth	Name	Category	Statistic	#Cells	plasmid	stain			Category	Statistic	#Cells	plasmid	stain		Category	Statistic	#Cells	plasmid	stain			Annexin V	SytoxBlue	empty vector	ecto peptide-GFP	ectoYtoE peptide-GFP	ecto AromtoE peptide-GFP	ecto peptide-GFP with z-VAD
	Specimen_002_D1_D01_001.fcs			50000	empty vector	Axn647 & SytoxBlue			APC-A-	94.9	24297	empty vector	Axn647 & SytoxBlue		Q1: APC-A- , DAPI-A+	0.45	101	ecto AromtoE peptide-GFP	Axn647 & SytoxBlue			-	-	94.7	65.3	90.3	86.5	86.3
>	Specimen_002_D1_D01_001.fcs		84	41976	empty vector	Axn647 & SytoxBlue			APC-A-	69.6	21993	ecto peptide-GFP	Axn647 & SytoxBlue		Q2: APC-A+ , DAPI-A+	8.17	1847	ecto AromtoE peptide-GFP	Axn647 & SytoxBlue			+	-	2.68	11.5	3.64	4.89	3.77
> >	Specimen_002_D1_D01_001.fcs		61	25595	empty vector	Axn647 & SytoxBlue			APC-A-	90.7	24460	ectoYtoE peptide-GFP	Axn647 & SytoxBlue		Q3: APC-A+ , DAPI-A-	4.89	1105	ecto AromtoE peptide-GFP	Axn647 & SytoxBlue			+	+	2.39	19.1	5.66	8.17	8.37
> > >	Specimen_002_D1_D01_001.fcs	APC-A+	5.07	1298	empty vector	Axn647 & SytoxBlue			APC-A-	86.9	19642	ecto AromtoE peptide-GFP	Axn647 & SytoxBlue		Q4: APC-A- , DAPI-A-	86.5	19541	ecto AromtoE peptide-GFP	Axn647 & SytoxBlue				# of cells	25595	31661	26969	22594	26634
> > >	Specimen_002_D1_D01_001.fcs	APC-A-	94.9	24297	empty vector	Axn647 & SytoxBlue			APC-A-	87.9	23401	ecto peptide-GFP with z-VAD	Axn647 & SytoxBlue		Q1: APC-A- , DAPI-A+	4.32	1365	ecto peptide-GFP	Axn647 & SytoxBlue
> > >	Specimen_002_D1_D01_001.fcs	Q1: APC-A- , DAPI-A+	0.18	46	empty vector	Axn647 & SytoxBlue			APC-A-	94.7	24133	empty vector	Axn647 & SytoxBlue		Q2: APC-A+ , DAPI-A+	19.1	6027	ecto peptide-GFP	Axn647 & SytoxBlue
> > >	Specimen_002_D1_D01_001.fcs	Q2: APC-A+ , DAPI-A+	2.39	611	empty vector	Axn647 & SytoxBlue			APC-A-	68.6	21347	ecto peptide-GFP	Axn647 & SytoxBlue		Q3: APC-A+ , DAPI-A-	11.5	3641	ecto peptide-GFP	Axn647 & SytoxBlue
> > >	Specimen_002_D1_D01_001.fcs	Q3: APC-A+ , DAPI-A-	2.68	687	empty vector	Axn647 & SytoxBlue			APC-A-	90.2	24729	ectoYtoE peptide-GFP	Axn647 & SytoxBlue		Q4: APC-A- , DAPI-A-	65.3	20628	ecto peptide-GFP	Axn647 & SytoxBlue
> > >	Specimen_002_D1_D01_001.fcs	Q4: APC-A- , DAPI-A-	94.7	24251	empty vector	Axn647 & SytoxBlue			APC-A-	86.6	20340	ecto AromtoE peptide-GFP	Axn647 & SytoxBlue		Q1: APC-A- , DAPI-A+	1.52	405	ecto peptide-GFP with z-VAD	Axn647 & SytoxBlue
	Specimen_002_D3_D03_003.fcs			50000	ecto peptide-GFP	Axn647 & SytoxBlue			APC-A-	86.8	24488	ecto peptide-GFP with z-VAD	Axn647 & SytoxBlue		Q2: APC-A+ , DAPI-A+	8.37	2228	ecto peptide-GFP with z-VAD	Axn647 & SytoxBlue
>	Specimen_002_D3_D03_003.fcs		87.9	43940	ecto peptide-GFP	Axn647 & SytoxBlue			APC-A-	100	25382	empty vector	unstained		Q3: APC-A+ , DAPI-A-	3.77	1005	ecto peptide-GFP with z-VAD	Axn647 & SytoxBlue
> >	Specimen_002_D3_D03_003.fcs		71.9	31606	ecto peptide-GFP	Axn647 & SytoxBlue			APC-A-	100	31343	ecto peptide-GFP	unstained		Q4: APC-A- , DAPI-A-	86.3	22996	ecto peptide-GFP with z-VAD	Axn647 & SytoxBlue
> > >	Specimen_002_D3_D03_003.fcs	APC-A+	30.4	9613	ecto peptide-GFP	Axn647 & SytoxBlue			APC-A-	100	28390	ectoYtoE peptide-GFP	unstained		Q1: APC-A- , DAPI-A+	0.41	111	ectoYtoE peptide-GFP	Axn647 & SytoxBlue
> > >	Specimen_002_D3_D03_003.fcs	APC-A-	69.6	21993	ecto peptide-GFP	Axn647 & SytoxBlue			APC-A-	100	24346	ecto AromtoE peptide-GFP	unstained		Q2: APC-A+ , DAPI-A+	5.66	1526	ectoYtoE peptide-GFP	Axn647 & SytoxBlue
> > >	Specimen_002_D3_D03_003.fcs	Q1: APC-A- , DAPI-A+	4.32	1365	ecto peptide-GFP	Axn647 & SytoxBlue			APC-A-	100	26849	ecto peptide-GFP with z-VAD	unstained		Q3: APC-A+ , DAPI-A-	3.64	983	ectoYtoE peptide-GFP	Axn647 & SytoxBlue
> > >	Specimen_002_D3_D03_003.fcs	Q2: APC-A+ , DAPI-A+	19.1	6027	ecto peptide-GFP	Axn647 & SytoxBlue			APC-A+	5.07	1298	empty vector	Axn647 & SytoxBlue		Q4: APC-A- , DAPI-A-	90.3	24349	ectoYtoE peptide-GFP	Axn647 & SytoxBlue
> > >	Specimen_002_D3_D03_003.fcs	Q3: APC-A+ , DAPI-A-	11.5	3641	ecto peptide-GFP	Axn647 & SytoxBlue			APC-A+	30.4	9613	ecto peptide-GFP	Axn647 & SytoxBlue		Q1: APC-A- , DAPI-A+	0.18	46	empty vector	Axn647 & SytoxBlue
> > >	Specimen_002_D3_D03_003.fcs	Q4: APC-A- , DAPI-A-	65.3	20628	ecto peptide-GFP	Axn647 & SytoxBlue			APC-A+	9.3	2509	ectoYtoE peptide-GFP	Axn647 & SytoxBlue		Q2: APC-A+ , DAPI-A+	2.39	611	empty vector	Axn647 & SytoxBlue
	Specimen_002_D4_D04_004.fcs			50000	ectoYtoE peptide-GFP	Axn647 & SytoxBlue			APC-A+	13.1	2952	ecto AromtoE peptide-GFP	Axn647 & SytoxBlue		Q3: APC-A+ , DAPI-A-	2.68	687	empty vector	Axn647 & SytoxBlue
>	Specimen_002_D4_D04_004.fcs		84.5	42249	ectoYtoE peptide-GFP	Axn647 & SytoxBlue			APC-A+	12.1	3233	ecto peptide-GFP with z-VAD	Axn647 & SytoxBlue		Q4: APC-A- , DAPI-A-	94.7	24251	empty vector	Axn647 & SytoxBlue
> >	Specimen_002_D4_D04_004.fcs		63.8	26969	ectoYtoE peptide-GFP	Axn647 & SytoxBlue			APC-A+	5.33	1359	empty vector	Axn647 & SytoxBlue
> > >	Specimen_002_D4_D04_004.fcs	APC-A+	9.3	2509	ectoYtoE peptide-GFP	Axn647 & SytoxBlue			APC-A+	31.4	9790	ecto peptide-GFP	Axn647 & SytoxBlue
> > >	Specimen_002_D4_D04_004.fcs	APC-A-	90.7	24460	ectoYtoE peptide-GFP	Axn647 & SytoxBlue			APC-A+	9.79	2684	ectoYtoE peptide-GFP	Axn647 & SytoxBlue
> > >	Specimen_002_D4_D04_004.fcs	Q1: APC-A- , DAPI-A+	0.41	111	ectoYtoE peptide-GFP	Axn647 & SytoxBlue			APC-A+	13.4	3157	ecto AromtoE peptide-GFP	Axn647 & SytoxBlue
> > >	Specimen_002_D4_D04_004.fcs	Q2: APC-A+ , DAPI-A+	5.66	1526	ectoYtoE peptide-GFP	Axn647 & SytoxBlue			APC-A+	13.2	3721	ecto peptide-GFP with z-VAD	Axn647 & SytoxBlue
> > >	Specimen_002_D4_D04_004.fcs	Q3: APC-A+ , DAPI-A-	3.64	983	ectoYtoE peptide-GFP	Axn647 & SytoxBlue			APC-A+	0.00394	1	empty vector	unstained
> > >	Specimen_002_D4_D04_004.fcs	Q4: APC-A- , DAPI-A-	90.3	24349	ectoYtoE peptide-GFP	Axn647 & SytoxBlue			APC-A+	0	0	ecto peptide-GFP	unstained
	Specimen_002_D5_D05_005.fcs			50000	ecto AromtoE peptide-GFP	Axn647 & SytoxBlue			APC-A+	0	0	ectoYtoE peptide-GFP	unstained
>	Specimen_002_D5_D05_005.fcs		75.7	37844	ecto AromtoE peptide-GFP	Axn647 & SytoxBlue			APC-A+	0	0	ecto AromtoE peptide-GFP	unstained
> >	Specimen_002_D5_D05_005.fcs		59.7	22594	ecto AromtoE peptide-GFP	Axn647 & SytoxBlue			APC-A+	0	0	ecto peptide-GFP with z-VAD	unstained
> > >	Specimen_002_D5_D05_005.fcs	APC-A+	13.1	2952	ecto AromtoE peptide-GFP	Axn647 & SytoxBlue			Q1: APC-A- , DAPI-A+	0.18	46	empty vector	Axn647 & SytoxBlue
> > >	Specimen_002_D5_D05_005.fcs	APC-A-	86.9	19642	ecto AromtoE peptide-GFP	Axn647 & SytoxBlue			Q1: APC-A- , DAPI-A+	4.32	1365	ecto peptide-GFP	Axn647 & SytoxBlue
> > >	Specimen_002_D5_D05_005.fcs	Q1: APC-A- , DAPI-A+	0.45	101	ecto AromtoE peptide-GFP	Axn647 & SytoxBlue			Q1: APC-A- , DAPI-A+	0.41	111	ectoYtoE peptide-GFP	Axn647 & SytoxBlue
> > >	Specimen_002_D5_D05_005.fcs	Q2: APC-A+ , DAPI-A+	8.17	1847	ecto AromtoE peptide-GFP	Axn647 & SytoxBlue			Q1: APC-A- , DAPI-A+	0.45	101	ecto AromtoE peptide-GFP	Axn647 & SytoxBlue
> > >	Specimen_002_D5_D05_005.fcs	Q3: APC-A+ , DAPI-A-	4.89	1105	ecto AromtoE peptide-GFP	Axn647 & SytoxBlue			Q1: APC-A- , DAPI-A+	1.52	405	ecto peptide-GFP with z-VAD	Axn647 & SytoxBlue
> > >	Specimen_002_D5_D05_005.fcs	Q4: APC-A- , DAPI-A-	86.5	19541	ecto AromtoE peptide-GFP	Axn647 & SytoxBlue			Q1: APC-A- , DAPI-A+	0.082	21	empty vector	Axn647 & SytoxBlue
	Specimen_002_D6_D06_006.fcs			50000	ecto peptide-GFP with z-VAD	Axn647 & SytoxBlue			Q1: APC-A- , DAPI-A+	3.74	1163	ecto peptide-GFP	Axn647 & SytoxBlue
>	Specimen_002_D6_D06_006.fcs		85.5	42746	ecto peptide-GFP with z-VAD	Axn647 & SytoxBlue			Q1: APC-A- , DAPI-A+	0.28	77	ectoYtoE peptide-GFP	Axn647 & SytoxBlue
> >	Specimen_002_D6_D06_006.fcs		62.3	26634	ecto peptide-GFP with z-VAD	Axn647 & SytoxBlue			Q1: APC-A- , DAPI-A+	0.44	103	ecto AromtoE peptide-GFP	Axn647 & SytoxBlue
> > >	Specimen_002_D6_D06_006.fcs	APC-A+	12.1	3233	ecto peptide-GFP with z-VAD	Axn647 & SytoxBlue			Q1: APC-A- , DAPI-A+	1.44	406	ecto peptide-GFP with z-VAD	Axn647 & SytoxBlue
> > >	Specimen_002_D6_D06_006.fcs	APC-A-	87.9	23401	ecto peptide-GFP with z-VAD	Axn647 & SytoxBlue			Q1: APC-A- , DAPI-A+	0.00788	2	empty vector	unstained
> > >	Specimen_002_D6_D06_006.fcs	Q1: APC-A- , DAPI-A+	1.52	405	ecto peptide-GFP with z-VAD	Axn647 & SytoxBlue			Q1: APC-A- , DAPI-A+	0.00319	1	ecto peptide-GFP	unstained
> > >	Specimen_002_D6_D06_006.fcs	Q2: APC-A+ , DAPI-A+	8.37	2228	ecto peptide-GFP with z-VAD	Axn647 & SytoxBlue			Q1: APC-A- , DAPI-A+	0.00352	1	ectoYtoE peptide-GFP	unstained
> > >	Specimen_002_D6_D06_006.fcs	Q3: APC-A+ , DAPI-A-	3.77	1005	ecto peptide-GFP with z-VAD	Axn647 & SytoxBlue			Q1: APC-A- , DAPI-A+	0	0	ecto AromtoE peptide-GFP	unstained
> > >	Specimen_002_D6_D06_006.fcs	Q4: APC-A- , DAPI-A-	86.3	22996	ecto peptide-GFP with z-VAD	Axn647 & SytoxBlue			Q1: APC-A- , DAPI-A+	0	0	ecto peptide-GFP with z-VAD	unstained
	Specimen_002_E1_E01_007.fcs			50000	empty vector	Axn647 & SytoxBlue			Q2: APC-A+ , DAPI-A+	2.39	611	empty vector	Axn647 & SytoxBlue
>	Specimen_002_E1_E01_007.fcs		83.4	41723	empty vector	Axn647 & SytoxBlue			Q2: APC-A+ , DAPI-A+	19.1	6027	ecto peptide-GFP	Axn647 & SytoxBlue
> >	Specimen_002_E1_E01_007.fcs		61.1	25492	empty vector	Axn647 & SytoxBlue			Q2: APC-A+ , DAPI-A+	5.66	1526	ectoYtoE peptide-GFP	Axn647 & SytoxBlue
> > >	Specimen_002_E1_E01_007.fcs	APC-A+	5.33	1359	empty vector	Axn647 & SytoxBlue			Q2: APC-A+ , DAPI-A+	8.17	1847	ecto AromtoE peptide-GFP	Axn647 & SytoxBlue
> > >	Specimen_002_E1_E01_007.fcs	APC-A-	94.7	24133	empty vector	Axn647 & SytoxBlue			Q2: APC-A+ , DAPI-A+	8.37	2228	ecto peptide-GFP with z-VAD	Axn647 & SytoxBlue
> > >	Specimen_002_E1_E01_007.fcs	Q1: APC-A- , DAPI-A+	0.082	21	empty vector	Axn647 & SytoxBlue			Q2: APC-A+ , DAPI-A+	2.99	761	empty vector	Axn647 & SytoxBlue
> > >	Specimen_002_E1_E01_007.fcs	Q2: APC-A+ , DAPI-A+	2.99	761	empty vector	Axn647 & SytoxBlue			Q2: APC-A+ , DAPI-A+	24	7463	ecto peptide-GFP	Axn647 & SytoxBlue
> > >	Specimen_002_E1_E01_007.fcs	Q3: APC-A+ , DAPI-A-	2.35	598	empty vector	Axn647 & SytoxBlue			Q2: APC-A+ , DAPI-A+	7.16	1964	ectoYtoE peptide-GFP	Axn647 & SytoxBlue
> > >	Specimen_002_E1_E01_007.fcs	Q4: APC-A- , DAPI-A-	94.6	24112	empty vector	Axn647 & SytoxBlue			Q2: APC-A+ , DAPI-A+	8.37	1966	ecto AromtoE peptide-GFP	Axn647 & SytoxBlue
	Specimen_002_E3_E03_009.fcs			50000	ecto peptide-GFP	Axn647 & SytoxBlue			Q2: APC-A+ , DAPI-A+	9.3	2624	ecto peptide-GFP with z-VAD	Axn647 & SytoxBlue
>	Specimen_002_E3_E03_009.fcs		86.8	43401	ecto peptide-GFP	Axn647 & SytoxBlue			Q2: APC-A+ , DAPI-A+	0.00394	1	empty vector	unstained
> >	Specimen_002_E3_E03_009.fcs		71.7	31137	ecto peptide-GFP	Axn647 & SytoxBlue			Q2: APC-A+ , DAPI-A+	0	0	ecto peptide-GFP	unstained
> > >	Specimen_002_E3_E03_009.fcs	APC-A+	31.4	9790	ecto peptide-GFP	Axn647 & SytoxBlue			Q2: APC-A+ , DAPI-A+	0	0	ectoYtoE peptide-GFP	unstained
> > >	Specimen_002_E3_E03_009.fcs	APC-A-	68.6	21347	ecto peptide-GFP	Axn647 & SytoxBlue			Q2: APC-A+ , DAPI-A+	0	0	ecto AromtoE peptide-GFP	unstained
> > >	Specimen_002_E3_E03_009.fcs	Q1: APC-A- , DAPI-A+	3.74	1163	ecto peptide-GFP	Axn647 & SytoxBlue			Q2: APC-A+ , DAPI-A+	0	0	ecto peptide-GFP with z-VAD	unstained
> > >	Specimen_002_E3_E03_009.fcs	Q2: APC-A+ , DAPI-A+	24	7463	ecto peptide-GFP	Axn647 & SytoxBlue			Q3: APC-A+ , DAPI-A-	2.68	687	empty vector	Axn647 & SytoxBlue
> > >	Specimen_002_E3_E03_009.fcs	Q3: APC-A+ , DAPI-A-	7.47	2327	ecto peptide-GFP	Axn647 & SytoxBlue			Q3: APC-A+ , DAPI-A-	11.5	3641	ecto peptide-GFP	Axn647 & SytoxBlue
> > >	Specimen_002_E3_E03_009.fcs	Q4: APC-A- , DAPI-A-	64.8	20184	ecto peptide-GFP	Axn647 & SytoxBlue			Q3: APC-A+ , DAPI-A-	3.64	983	ectoYtoE peptide-GFP	Axn647 & SytoxBlue
	Specimen_002_E4_E04_010.fcs			50000	ectoYtoE peptide-GFP	Axn647 & SytoxBlue			Q3: APC-A+ , DAPI-A-	4.89	1105	ecto AromtoE peptide-GFP	Axn647 & SytoxBlue
>	Specimen_002_E4_E04_010.fcs		85.5	42741	ectoYtoE peptide-GFP	Axn647 & SytoxBlue			Q3: APC-A+ , DAPI-A-	3.77	1005	ecto peptide-GFP with z-VAD	Axn647 & SytoxBlue
> >	Specimen_002_E4_E04_010.fcs		64.1	27413	ectoYtoE peptide-GFP	Axn647 & SytoxBlue			Q3: APC-A+ , DAPI-A-	2.35	598	empty vector	Axn647 & SytoxBlue
> > >	Specimen_002_E4_E04_010.fcs	APC-A+	9.79	2684	ectoYtoE peptide-GFP	Axn647 & SytoxBlue			Q3: APC-A+ , DAPI-A-	7.47	2327	ecto peptide-GFP	Axn647 & SytoxBlue
> > >	Specimen_002_E4_E04_010.fcs	APC-A-	90.2	24729	ectoYtoE peptide-GFP	Axn647 & SytoxBlue			Q3: APC-A+ , DAPI-A-	2.63	720	ectoYtoE peptide-GFP	Axn647 & SytoxBlue
> > >	Specimen_002_E4_E04_010.fcs	Q1: APC-A- , DAPI-A+	0.28	77	ectoYtoE peptide-GFP	Axn647 & SytoxBlue			Q3: APC-A+ , DAPI-A-	5.07	1191	ecto AromtoE peptide-GFP	Axn647 & SytoxBlue
> > >	Specimen_002_E4_E04_010.fcs	Q2: APC-A+ , DAPI-A+	7.16	1964	ectoYtoE peptide-GFP	Axn647 & SytoxBlue			Q3: APC-A+ , DAPI-A-	3.89	1097	ecto peptide-GFP with z-VAD	Axn647 & SytoxBlue
> > >	Specimen_002_E4_E04_010.fcs	Q3: APC-A+ , DAPI-A-	2.63	720	ectoYtoE peptide-GFP	Axn647 & SytoxBlue			Q3: APC-A+ , DAPI-A-	0	0	empty vector	unstained
> > >	Specimen_002_E4_E04_010.fcs	Q4: APC-A- , DAPI-A-	89.9	24652	ectoYtoE peptide-GFP	Axn647 & SytoxBlue			Q3: APC-A+ , DAPI-A-	0	0	ecto peptide-GFP	unstained
	Specimen_002_E5_E05_011.fcs			50000	ecto AromtoE peptide-GFP	Axn647 & SytoxBlue			Q3: APC-A+ , DAPI-A-	0	0	ectoYtoE peptide-GFP	unstained
>	Specimen_002_E5_E05_011.fcs		79	39482	ecto AromtoE peptide-GFP	Axn647 & SytoxBlue			Q3: APC-A+ , DAPI-A-	0	0	ecto AromtoE peptide-GFP	unstained
> >	Specimen_002_E5_E05_011.fcs		59.5	23497	ecto AromtoE peptide-GFP	Axn647 & SytoxBlue			Q3: APC-A+ , DAPI-A-	0	0	ecto peptide-GFP with z-VAD	unstained
> > >	Specimen_002_E5_E05_011.fcs	APC-A+	13.4	3157	ecto AromtoE peptide-GFP	Axn647 & SytoxBlue			Q4: APC-A- , DAPI-A-	94.7	24251	empty vector	Axn647 & SytoxBlue
> > >	Specimen_002_E5_E05_011.fcs	APC-A-	86.6	20340	ecto AromtoE peptide-GFP	Axn647 & SytoxBlue			Q4: APC-A- , DAPI-A-	65.3	20628	ecto peptide-GFP	Axn647 & SytoxBlue
> > >	Specimen_002_E5_E05_011.fcs	Q1: APC-A- , DAPI-A+	0.44	103	ecto AromtoE peptide-GFP	Axn647 & SytoxBlue			Q4: APC-A- , DAPI-A-	90.3	24349	ectoYtoE peptide-GFP	Axn647 & SytoxBlue
> > >	Specimen_002_E5_E05_011.fcs	Q2: APC-A+ , DAPI-A+	8.37	1966	ecto AromtoE peptide-GFP	Axn647 & SytoxBlue			Q4: APC-A- , DAPI-A-	86.5	19541	ecto AromtoE peptide-GFP	Axn647 & SytoxBlue
> > >	Specimen_002_E5_E05_011.fcs	Q3: APC-A+ , DAPI-A-	5.07	1191	ecto AromtoE peptide-GFP	Axn647 & SytoxBlue			Q4: APC-A- , DAPI-A-	86.3	22996	ecto peptide-GFP with z-VAD	Axn647 & SytoxBlue
> > >	Specimen_002_E5_E05_011.fcs	Q4: APC-A- , DAPI-A-	86.1	20237	ecto AromtoE peptide-GFP	Axn647 & SytoxBlue			Q4: APC-A- , DAPI-A-	94.6	24112	empty vector	Axn647 & SytoxBlue
	Specimen_002_E6_E06_012.fcs			50033	ecto peptide-GFP with z-VAD	Axn647 & SytoxBlue			Q4: APC-A- , DAPI-A-	64.8	20184	ecto peptide-GFP	Axn647 & SytoxBlue
>	Specimen_002_E6_E06_012.fcs		86	43040	ecto peptide-GFP with z-VAD	Axn647 & SytoxBlue			Q4: APC-A- , DAPI-A-	89.9	24652	ectoYtoE peptide-GFP	Axn647 & SytoxBlue
> >	Specimen_002_E6_E06_012.fcs		65.5	28209	ecto peptide-GFP with z-VAD	Axn647 & SytoxBlue			Q4: APC-A- , DAPI-A-	86.1	20237	ecto AromtoE peptide-GFP	Axn647 & SytoxBlue
> > >	Specimen_002_E6_E06_012.fcs	APC-A+	13.2	3721	ecto peptide-GFP with z-VAD	Axn647 & SytoxBlue			Q4: APC-A- , DAPI-A-	85.4	24082	ecto peptide-GFP with z-VAD	Axn647 & SytoxBlue
> > >	Specimen_002_E6_E06_012.fcs	APC-A-	86.8	24488	ecto peptide-GFP with z-VAD	Axn647 & SytoxBlue			Q4: APC-A- , DAPI-A-	100	25380	empty vector	unstained
> > >	Specimen_002_E6_E06_012.fcs	Q1: APC-A- , DAPI-A+	1.44	406	ecto peptide-GFP with z-VAD	Axn647 & SytoxBlue			Q4: APC-A- , DAPI-A-	100	31342	ecto peptide-GFP	unstained
> > >	Specimen_002_E6_E06_012.fcs	Q2: APC-A+ , DAPI-A+	9.3	2624	ecto peptide-GFP with z-VAD	Axn647 & SytoxBlue			Q4: APC-A- , DAPI-A-	100	28389	ectoYtoE peptide-GFP	unstained
> > >	Specimen_002_E6_E06_012.fcs	Q3: APC-A+ , DAPI-A-	3.89	1097	ecto peptide-GFP with z-VAD	Axn647 & SytoxBlue			Q4: APC-A- , DAPI-A-	100	24346	ecto AromtoE peptide-GFP	unstained
> > >	Specimen_002_E6_E06_012.fcs	Q4: APC-A- , DAPI-A-	85.4	24082	ecto peptide-GFP with z-VAD	Axn647 & SytoxBlue			Q4: APC-A- , DAPI-A-	100	26849	ecto peptide-GFP with z-VAD	unstained
	Specimen_002_F1_F01_013.fcs			50000	empty vector	unstained					50000	empty vector	Axn647 & SytoxBlue
>	Specimen_002_F1_F01_013.fcs		83.8	41893	empty vector	unstained				84	41976	empty vector	Axn647 & SytoxBlue
> >	Specimen_002_F1_F01_013.fcs		60.6	25383	empty vector	unstained				61	25595	empty vector	Axn647 & SytoxBlue
> > >	Specimen_002_F1_F01_013.fcs	APC-A+	0.00394	1	empty vector	unstained					50000	ecto peptide-GFP	Axn647 & SytoxBlue
> > >	Specimen_002_F1_F01_013.fcs	APC-A-	100	25382	empty vector	unstained				87.9	43940	ecto peptide-GFP	Axn647 & SytoxBlue
> > >	Specimen_002_F1_F01_013.fcs	Q1: APC-A- , DAPI-A+	0.00788	2	empty vector	unstained				71.9	31606	ecto peptide-GFP	Axn647 & SytoxBlue
> > >	Specimen_002_F1_F01_013.fcs	Q2: APC-A+ , DAPI-A+	0.00394	1	empty vector	unstained					50000	ectoYtoE peptide-GFP	Axn647 & SytoxBlue
> > >	Specimen_002_F1_F01_013.fcs	Q3: APC-A+ , DAPI-A-	0	0	empty vector	unstained				84.5	42249	ectoYtoE peptide-GFP	Axn647 & SytoxBlue
> > >	Specimen_002_F1_F01_013.fcs	Q4: APC-A- , DAPI-A-	100	25380	empty vector	unstained				63.8	26969	ectoYtoE peptide-GFP	Axn647 & SytoxBlue
	Specimen_002_F3_F03_015.fcs			50000	ecto peptide-GFP	unstained					50000	ecto AromtoE peptide-GFP	Axn647 & SytoxBlue
>	Specimen_002_F3_F03_015.fcs		87.4	43681	ecto peptide-GFP	unstained				75.7	37844	ecto AromtoE peptide-GFP	Axn647 & SytoxBlue
> >	Specimen_002_F3_F03_015.fcs		71.8	31343	ecto peptide-GFP	unstained				59.7	22594	ecto AromtoE peptide-GFP	Axn647 & SytoxBlue
> > >	Specimen_002_F3_F03_015.fcs	APC-A+	0	0	ecto peptide-GFP	unstained					50000	ecto peptide-GFP with z-VAD	Axn647 & SytoxBlue
> > >	Specimen_002_F3_F03_015.fcs	APC-A-	100	31343	ecto peptide-GFP	unstained				85.5	42746	ecto peptide-GFP with z-VAD	Axn647 & SytoxBlue
> > >	Specimen_002_F3_F03_015.fcs	Q1: APC-A- , DAPI-A+	0.00319	1	ecto peptide-GFP	unstained				62.3	26634	ecto peptide-GFP with z-VAD	Axn647 & SytoxBlue
> > >	Specimen_002_F3_F03_015.fcs	Q2: APC-A+ , DAPI-A+	0	0	ecto peptide-GFP	unstained					50000	empty vector	Axn647 & SytoxBlue
> > >	Specimen_002_F3_F03_015.fcs	Q3: APC-A+ , DAPI-A-	0	0	ecto peptide-GFP	unstained				83.4	41723	empty vector	Axn647 & SytoxBlue
> > >	Specimen_002_F3_F03_015.fcs	Q4: APC-A- , DAPI-A-	100	31342	ecto peptide-GFP	unstained				61.1	25492	empty vector	Axn647 & SytoxBlue
	Specimen_002_F4_F04_016.fcs			50000	ectoYtoE peptide-GFP	unstained					50000	ecto peptide-GFP	Axn647 & SytoxBlue
>	Specimen_002_F4_F04_016.fcs		86.4	43188	ectoYtoE peptide-GFP	unstained				86.8	43401	ecto peptide-GFP	Axn647 & SytoxBlue
> >	Specimen_002_F4_F04_016.fcs		65.7	28390	ectoYtoE peptide-GFP	unstained				71.7	31137	ecto peptide-GFP	Axn647 & SytoxBlue
> > >	Specimen_002_F4_F04_016.fcs	APC-A+	0	0	ectoYtoE peptide-GFP	unstained					50000	ectoYtoE peptide-GFP	Axn647 & SytoxBlue
> > >	Specimen_002_F4_F04_016.fcs	APC-A-	100	28390	ectoYtoE peptide-GFP	unstained				85.5	42741	ectoYtoE peptide-GFP	Axn647 & SytoxBlue
> > >	Specimen_002_F4_F04_016.fcs	Q1: APC-A- , DAPI-A+	0.00352	1	ectoYtoE peptide-GFP	unstained				64.1	27413	ectoYtoE peptide-GFP	Axn647 & SytoxBlue
> > >	Specimen_002_F4_F04_016.fcs	Q2: APC-A+ , DAPI-A+	0	0	ectoYtoE peptide-GFP	unstained					50000	ecto AromtoE peptide-GFP	Axn647 & SytoxBlue
> > >	Specimen_002_F4_F04_016.fcs	Q3: APC-A+ , DAPI-A-	0	0	ectoYtoE peptide-GFP	unstained				79	39482	ecto AromtoE peptide-GFP	Axn647 & SytoxBlue
> > >	Specimen_002_F4_F04_016.fcs	Q4: APC-A- , DAPI-A-	100	28389	ectoYtoE peptide-GFP	unstained				59.5	23497	ecto AromtoE peptide-GFP	Axn647 & SytoxBlue
	Specimen_002_F5_F05_017.fcs			50000	ecto AromtoE peptide-GFP	unstained					50033	ecto peptide-GFP with z-VAD	Axn647 & SytoxBlue
>	Specimen_002_F5_F05_017.fcs		79.3	39669	ecto AromtoE peptide-GFP	unstained				86	43040	ecto peptide-GFP with z-VAD	Axn647 & SytoxBlue
> >	Specimen_002_F5_F05_017.fcs		61.4	24346	ecto AromtoE peptide-GFP	unstained				65.5	28209	ecto peptide-GFP with z-VAD	Axn647 & SytoxBlue
> > >	Specimen_002_F5_F05_017.fcs	APC-A+	0	0	ecto AromtoE peptide-GFP	unstained					50000	empty vector	unstained
> > >	Specimen_002_F5_F05_017.fcs	APC-A-	100	24346	ecto AromtoE peptide-GFP	unstained				83.8	41893	empty vector	unstained
> > >	Specimen_002_F5_F05_017.fcs	Q1: APC-A- , DAPI-A+	0	0	ecto AromtoE peptide-GFP	unstained				60.6	25383	empty vector	unstained
> > >	Specimen_002_F5_F05_017.fcs	Q2: APC-A+ , DAPI-A+	0	0	ecto AromtoE peptide-GFP	unstained					50000	ecto peptide-GFP	unstained
> > >	Specimen_002_F5_F05_017.fcs	Q3: APC-A+ , DAPI-A-	0	0	ecto AromtoE peptide-GFP	unstained				87.4	43681	ecto peptide-GFP	unstained
> > >	Specimen_002_F5_F05_017.fcs	Q4: APC-A- , DAPI-A-	100	24346	ecto AromtoE peptide-GFP	unstained				71.8	31343	ecto peptide-GFP	unstained
	Specimen_002_F6_F06_018.fcs			50000	ecto peptide-GFP with z-VAD	unstained					50000	ectoYtoE peptide-GFP	unstained
>	Specimen_002_F6_F06_018.fcs		84	42010	ecto peptide-GFP with z-VAD	unstained				86.4	43188	ectoYtoE peptide-GFP	unstained
> >	Specimen_002_F6_F06_018.fcs		63.9	26849	ecto peptide-GFP with z-VAD	unstained				65.7	28390	ectoYtoE peptide-GFP	unstained
> > >	Specimen_002_F6_F06_018.fcs	APC-A+	0	0	ecto peptide-GFP with z-VAD	unstained					50000	ecto AromtoE peptide-GFP	unstained
> > >	Specimen_002_F6_F06_018.fcs	APC-A-	100	26849	ecto peptide-GFP with z-VAD	unstained				79.3	39669	ecto AromtoE peptide-GFP	unstained
> > >	Specimen_002_F6_F06_018.fcs	Q1: APC-A- , DAPI-A+	0	0	ecto peptide-GFP with z-VAD	unstained				61.4	24346	ecto AromtoE peptide-GFP	unstained
> > >	Specimen_002_F6_F06_018.fcs	Q2: APC-A+ , DAPI-A+	0	0	ecto peptide-GFP with z-VAD	unstained					50000	ecto peptide-GFP with z-VAD	unstained
> > >	Specimen_002_F6_F06_018.fcs	Q3: APC-A+ , DAPI-A-	0	0	ecto peptide-GFP with z-VAD	unstained				84	42010	ecto peptide-GFP with z-VAD	unstained
> > >	Specimen_002_F6_F06_018.fcs	Q4: APC-A- , DAPI-A-	100	26849	ecto peptide-GFP with z-VAD	unstained				63.9	26849	ecto peptide-GFP with z-VAD	unstained

## Sheet: compiled
	Statistic	#Cells	plasmid	stain				bio rep	empty vector	ecto peptide-GFP	ectoYtoE peptide-GFP	ecto AromtoE peptide-GFP	ecto peptide-GFP with z-VAD		bio rep	ecto peptide-GFP	ecto AromtoE peptide-GFP	ectoYtoE peptide-GFP	empty vector	ecto peptide-GFP with z-VAD
APC-A+	9.82	2226	empty vector	Axn647 only	Rep 1			1	9.82	36.3	24.4	25.5			1	36.3	25.5	24.4	9.82
APC-A+	36.3	10264	ecto peptide-GFP	Axn647 only	Rep 1			2	5.07	30.4	9.3	13.1	12.1		2	30.4	13.1	9.3	5.07	12.1
APC-A+	24.4	6580	ectoYtoE peptide-GFP	Axn647 only	Rep 1			3	5.33	31.4	9.79	13.4	13.2		3	31.4	13.4	9.79	5.33	13.2
APC-A+	25.5	7792	ecto AromtoE peptide-GFP	Axn647 only	Rep 1			average	6.74	32.7	14.4967	17.3333	12.65		average	32.7	17.3333	14.4967	6.74	12.65
APC-A+	0	0	empty vector	unstained	Rep 1			sem	1.54183	1.823	4.95369	4.08425	0.449073		sem	1.823	4.08425	4.95369	1.54183	0.449073
APC-A+	0	0	ecto peptide-GFP	unstained	Rep 1
APC-A+	0	0	ectoYtoE peptide-GFP	unstained	Rep 1
APC-A+	0	0	ecto AromtoE peptide-GFP	unstained	Rep 1
APC-A+	5.07	1298	empty vector	Axn647 & SytoxBlue	Rep 2
APC-A+	30.4	9613	ecto peptide-GFP	Axn647 & SytoxBlue	Rep 2
APC-A+	9.3	2509	ectoYtoE peptide-GFP	Axn647 & SytoxBlue	Rep 2
APC-A+	13.1	2952	ecto AromtoE peptide-GFP	Axn647 & SytoxBlue	Rep 2
APC-A+	12.1	3233	ecto peptide-GFP with z-VAD	Axn647 & SytoxBlue	Rep 2
APC-A+	5.33	1359	empty vector	Axn647 & SytoxBlue	Rep 3
APC-A+	31.4	9790	ecto peptide-GFP	Axn647 & SytoxBlue	Rep 3
APC-A+	9.79	2684	ectoYtoE peptide-GFP	Axn647 & SytoxBlue	Rep 3
APC-A+	13.4	3157	ecto AromtoE peptide-GFP	Axn647 & SytoxBlue	Rep 3
APC-A+	13.2	3721	ecto peptide-GFP with z-VAD	Axn647 & SytoxBlue	Rep 3
APC-A+	0.00394	1	empty vector	unstained
APC-A+	0	0	ecto peptide-GFP	unstained
APC-A+	0	0	ectoYtoE peptide-GFP	unstained
APC-A+	0	0	ecto AromtoE peptide-GFP	unstained
APC-A+	0	0	ecto peptide-GFP with z-VAD	unstained

## Sheet: unpaired t test
Table Analyzed	AnnexinV+	AnnexinV+	AnnexinV+	Data 2
Column C	ectoYtoE peptide-GFP	ecto AromtoE peptide-GFP	ecto peptide-GFP with z-VAD	ecto AromtoE peptide-GFP
vs.	vs.	vs.	vs.	vs.
Column B	ecto peptide-GFP	ecto peptide-GFP	ecto peptide-GFP	ectoYtoE peptide-GFP
Unpaired t test
P value	0.0261	0.0264	0.0035	0.6814
P value summary	*	*	**	ns
Significantly different? (P < 0.05)	Yes	Yes	Yes	No
One- or two-tailed P value?	Two-tailed	Two-tailed	Two-tailed	Two-tailed
t, df	t=3.449 df=4	t=3.436 df=4	t=8.393 df=3	t=0.4418 df=4
How big is the difference?
Mean ± SEM of column B	32.70 ± 1.823, n=3	32.70 ± 1.823, n=3	32.70 ± 1.823, n=3	14.50 ± 4.954, n=3
Mean ± SEM of column C	14.50 ± 4.954, n=3	17.33 ± 4.084, n=3	12.65 ± 0.5500, n=2	17.33 ± 4.084, n=3
Difference between means	-18.20 ± 5.278	-15.37 ± 4.473	-20.05 ± 2.389	2.837 ± 6.420
95% confidence interval	-32.86 to -3.548	-27.78 to -2.949	-27.65 to -12.45	-14.99 to 20.66
R squared	0.7483	0.7469	0.9592	0.04653
F test to compare variances
F,DFn, Dfd	7.384, 2, 2	5.019, 2, 2		1.471, 2, 2
P value	0.2386	0.3323		0.8094
P value summary	ns	ns		ns
Significantly different? (P < 0.05)	No	No		No
