# Supplementary material for: Misfolded proteins bind and activate death receptor 5 to trigger apoptosis during unresolved endoplasmic reticulum stress
Source: eLife. 2020 Jan 6;9:e52291. doi: 10.7554/eLife.52291 (PMC7041945; doi:10.7554/eLife.52291)
Supplement: Figure 2—source data 1. — This excel file contains the caspase glo 8 luminescent units of the fractionation samples (n = 3 biological replicates) shown in Figure 2C. [file elife-52291-fig2-data1.xlsx]

## Sheet: Rep 1
##BLOCKS= 1																														bg subtracted	bg subtracted
Plate:	Plate01	1.3	PlateFormat	Endpoint	Luminescence	Raw	FALSE	1						1	0	1	24	384						1	Automatic		Fraction	MPZ (RLUs)		MPZ (RLUs)		relative to total MPZ input
	Temperature(¡C)	1	2	3	4	5	6	7	8	9	10	11	12	13	14	15	16	17	18	19	20	21	22	23	24		1	458.878		458.878		0.217219
	23.2																										2	1054.86		1054.86		0.499337
																											3	380.533		380.533		0.180132
																											4	265.813		265.813		0.125828
																											5	318.976		318.976		0.150993
																											6	167.882		167.882		0.0794701
		MPZ		MPZ		MPZ		MPZ		MPZ		MPZ		MPZ		MPZ		MPZ		MPZ		MPZ		MPZ			7	95.133		95.133		0.045033
	Fractions 1-12	458.878		1054.86		380.533		265.813		318.976		167.882		95.133		81.143		44.769		41.971		13.99		22.384			8	81.143		81.143		0.0384106
	Fractions 13-17	22.384		25.182		19.586		22.384		11.192		853.401		218.247		685.519		207.055		8.394		2.798		0			9	44.769		44.769		0.0211923
																											10	41.971		41.971		0.0198678
																											11	13.99		13.99		0.00662243
																											12	22.384		22.384		0.0105959
																											13	22.384		22.384		0.0105959
																											14	25.182		25.182		0.0119204
																											15	19.586		19.586		0.0092714
																											16	22.384		22.384		0.0105959
																											17	0		0		0
~End																											dilution of input	MPZ (RLUs)		MPZ (RLUs)		MPZ (RLUs)
																											0.04	853.401		845.007		21125.2
																											0.02	453.282		444.888		22244.4
																											0.01	218.247		209.853		20985.3
																											0.005	89.537		81.143		16228.6

## Sheet: rep 2 and 3
##BLOCKS= 1
Plate:	Plate01	1.3	PlateFormat	Endpoint	Luminescence	Raw	FALSE	1						1	0	1	24	384						1	Automatic			1	7	None
	Fraction	1	13	2	14	3	15	4	16	5	17	6		7		8		9		10		11		12
	Row A-B	MPZ	MPZ	MPZ	MPZ	MPZ	MPZ	MPZ	MPZ	MPZ	MPZ	MPZ		MPZ		MPZ		MPZ		MPZ		MPZ		MPZ
	Rep 2	515.334	11.326	639.921	25.484	198.206	5.663	96.271	5.663	130.249	8.495	33.978	0	48.136	2.832	39.641	0	22.652	0	14.158	0	2.832	2.832	8.495	2.832
	Rep 3	523.829	16.989	662.573	16.989	155.733	8.495	93.44	14.158	67.956	0	84.945	8.495	62.293	0	25.484	2.832	5.663	0	28.315	0	11.326	0	14.158	0
	AVERAGE	519.582	14.1575	651.247	21.2365	176.969	7.079	94.8555	9.9105	99.1025	4.2475	59.4615	4.2475	55.2145	1.416	32.5625	1.416	14.1575	0	21.2365	0	7.079	1.416	11.3265	1.416
	ST DEV	6.00687	4.00435	16.0174	6.00687	30.0329	2.00253	2.00182	6.00687	44.0478	6.00687	36.0391	6.00687	10.0105	2.00253	10.0105	2.00253	12.013	0	10.0105	0	6.00616	2.00253	4.00435	2.00253
		1970.73	2041.52	889.094	979.702	470.03	475.693	300.14	362.433																0
Row G (inputs)		1x10	1x10	1x20	1x20	1x40	1x40	1x80	1x80
		MPZ	MPZ	MPZ	MPZ	MPZ	MPZ	MPZ	MPZ
	lysate dilution	MPZ RLUs	average				Fraction	Row A-B	RLUs Rep 2	RLUs Rep 3		norm to input - REP 2	norm to input - REP 3
	0.1	1970.73	2006.12				1	MPZ	515.334	523.829		0.256881	0.261115
	0.1	2041.52					2	MPZ	639.921	662.573		0.318984	0.330275
	0.05	889.094	934.398				3	MPZ	198.206	155.733		0.0988005	0.0776288
	0.05	979.702					4	MPZ	96.271	93.44		0.0479886	0.0465774
	0.025	470.03	472.861				5	MPZ	130.249	67.956		0.0649257	0.0338743
	0.025	475.693					6	MPZ	33.978	84.945		0.0169371	0.0423429
~End	0.0125	300.14	331.286				7	MPZ	48.136	62.293		0.0239945	0.0310514
	0.0125	362.433					8	MPZ	39.641	25.484		0.01976	0.0127031
							9	MPZ	22.652	5.663		0.0112914	0.00282286
							10	MPZ	14.158	28.315		0.00705739	0.0141143
							11	MPZ	2.832	11.326		0.00141168	0.00564572
							12	MPZ	8.495	14.158		0.00423454	0.00705739
							13	MPZ	11.326	16.989		0.00564572	0.00846857
							14	MPZ	25.484	16.989		0.0127031	0.00846857
							15	MPZ	5.663	8.495		0.00282286	0.00423454
							16	MPZ	5.663	14.158		0.00282286	0.00705739
							17	MPZ	8.495	0		0.00423454	0
							Rationale for normalization: I load 200 ul of the input onto 2.2 ml of gradient, which is a 1x10 dilution of the lysate.

## Sheet: Compiled
Fraction	Row A-C	norm to input - REP 1	norm to input - REP 2	relative to total MPZ input (from 2018-04-12)	average normalized RLUs	ST DEV normalized RLUs	SEM
1	MPZ	0.256881	0.261115	0.213245	0.243747	0.0265001	0.0152998
2	MPZ	0.318984	0.330275	0.495364	0.381541	0.098735	0.0570047
3	MPZ	0.0988005	0.0776288	0.176159	0.117529	0.0518664	0.0299451
4	MPZ	0.0479886	0.0465774	0.121854	0.07214	0.0430595	0.0248604
5	MPZ	0.0649257	0.0338743	0.14702	0.08194	0.0584602	0.033752
6	MPZ	0.0169371	0.0423429	0.0754967	0.0449256	0.0293651	0.0169539
7	MPZ	0.0239945	0.0310514	0.0410595	0.0320352	0.00857493	0.00495074
8	MPZ	0.01976	0.0127031	0.0344371	0.0223001	0.0110874	0.00640132
9	MPZ	0.0112914	0.00282286	0.0172188	0.0104444	0.00723525	0.00417727
10	MPZ	0.00705739	0.0141143	0.0158943	0.0123553	0.00467367	0.00269835
11	MPZ	0.00141168	0.00564572	0.00264897	0.00323546	0.00217709	0.00125695
12	MPZ	0.00423454	0.00705739	0.00662243	0.00597145	0.00151986	0.000877489
13	MPZ	0.00564572	0.00846857	0.00662243	0.00691224	0.00143357	0.000827672
14	MPZ	0.0127031	0.00846857	0.00794692	0.0097062	0.00260847	0.001506
15	MPZ	0.00282286	0.00423454	0.00529794	0.00411845	0.00124162	0.00071685
16	MPZ	0.00282286	0.00705739	0.00662243	0.00550089	0.00232942	0.00134489
17	MPZ	0.00423454	0	0.0092714	0.00450198	0.00464148	0.00267976
Rationale for normalization: I load 200 ul of the input onto 2.2 ml of gradient, which is a 1x10 dilution of the lysate.

## Sheet: unpaired t test
Table Analyzed	Data 1	Data 1	Data 1
Column B	fraction 2	fraction 3	fraction 4
vs.	vs.	vs.	vs.
Column A	fraction 1	fraction 2	fraction 3
Unpaired t test
P value	0.0798	0.0149	0.3083
P value summary	ns	*	ns
Significantly different? (P < 0.05)	No	Yes	No
One- or two-tailed P value?	Two-tailed	Two-tailed	Two-tailed
t, df	t=2.335 df=4	t=4.100 df=4	t=1.166 df=4
How big is the difference?
Mean ± SEM of column A	0.2437 ± 0.01530, n=3	0.3815 ± 0.05700, n=3	0.1175 ± 0.02995, n=3
Mean ± SEM of column B	0.3815 ± 0.05700, n=3	0.1175 ± 0.02995, n=3	0.07214 ± 0.02486, n=3
Difference between means	0.1378 ± 0.05902	-0.2640 ± 0.06439	-0.04539 ± 0.03892
95% confidence interval	-0.02608 to 0.3017	-0.4428 to -0.08523	-0.1534 to 0.06267
R squared	0.5767	0.8078	0.2537
F test to compare variances
F,DFn, Dfd	13.88, 2, 2	3.624, 2, 2	1.451, 2, 2
P value	0.1344	0.4325	0.816
P value summary	ns	ns	ns
Significantly different? (P < 0.05)	No	No	No
