# Supplementary material for: Misfolded proteins bind and activate death receptor 5 to trigger apoptosis during unresolved endoplasmic reticulum stress
Source: eLife. 2020 Jan 6;9:e52291. doi: 10.7554/eLife.52291 (PMC7041945; doi:10.7554/eLife.52291)
Supplement: Figure 3—source data 1. — This excel file contains the peptide sequences of the peptide array shown in Figure 3A, the quantification of DR5 ECD detected for each spot, and the analysis for enriched amino acids in Figure 3—figure supplement 1. [file elife-52291-fig3-data1.xlsx]

## Sheet: MPZ
peptide	Row	column	ROI	area	mean	min	max	intden	rawintden	Corrected rawintden - min	normalized	domain	arbitrary x-axis
mapgapssspspilaall	B	17	37	0.011	9494.38	6154	16150	108.059	1481123	1408657	0.34296	signal peptide	1
gapssspspilaallfss	B	18	38	0.011	8862.44	5271	16820	100.866	1382541	1310075	0.318959	signal peptide	2
ssspspilaallfsslvl	B	19	39	0.011	5487.83	4425	7385	62.459	856102	783636	0.190789	signal peptide	3
pspilaallfsslvlspa	B	20	40	0.011	3798.54	3028	5021	43.232	592572	520106	0.126628	signal peptide	4
ilaallfsslvlspalai	C	1	41	0.011	5667.2	3505	8253	64.5	884083	811617	0.197601	signal peptide	5
allfsslvlspalaivvy	C	2	42	0.011	4132.17	2839	8351	47.03	644619	572153	0.1393	extracellular	6
fsslvlspalaivvytdr	C	3	43	0.011	10354.9	5496	14527	117.853	1615370	1542904	0.375645	extracellular	7
lvlspalaivvytdreiy	C	4	44	0.011	10056.9	5409	14853	114.461	1568876	1496410	0.364325	extracellular	8
spalaivvytdreiygav	C	5	45	0.011	10419.5	6084	15362	118.587	1625439	1552973	0.378096	extracellular	9
laivvytdreiygavgsq	C	6	46	0.011	7590.16	4274	11396	86.386	1184065	1111599	0.270637	extracellular	10
vvytdreiygavgsqvtl	C	7	47	0.011	8439.79	3439	13765	96.056	1316607	1244141	0.302906	extracellular	11
tdreiygavgsqvtlhcs	C	8	48	0.011	5624.79	3500	8372	64.018	877467	805001	0.19599	extracellular	12
eiygavgsqvtlhcsfws	C	9	49	0.011	7231.93	3880	12342	82.309	1128181	1055715	0.257031	extracellular	13
gavgsqvtlhcsfwssew	C	10	50	0.011	7917.1	4514	11285	90.107	1235067	1162601	0.283054	extracellular	14
gsqvtlhcsfwssewvsd	C	11	51	0.011	6656.6	3299	11129	75.761	1038430	965964	0.235179	extracellular	15
vtlhcsfwssewvsddiS	C	12	52	0.011	8355.65	3902	13347	95.098	1303481	1231015	0.29971	extracellular	16
hcsfwssewvsddiSftw	C	13	53	0.011	9140.1	5021	24647	104.026	1425856	1353390	0.329505	extracellular	17
fwssewvsddiSftwryq	C	14	54	0.011	12238.7	7049	16637	139.293	1909239	1836773	0.447192	extracellular	18
sewvsddiSftwryqpeg	C	15	55	0.011	13515.3	6780	20169	153.822	2108393	2035927	0.495679	extracellular	19
vsddiSftwryqpeggrd	C	16	56	0.011	17406.2	8515	23049	198.106	2715371	2642905	0.643458	extracellular	20
diSftwryqpeggrdais	C	17	57	0.011	19370.8	12010	24665	220.465	3021838	2949372	0.718072	extracellular	21
ftwryqpeggrdaisifh	C	18	58	0.011	21711.8	10939	32517	247.108	3387033	3314567	0.806985	extracellular	22
ryqpeggrdaisifhyak	C	19	59	0.011	26757.5	11997	37812	304.536	4174170	4101704	0.998626	extracellular	23
peggrdaisifhyakgqp	C	20	60	0.011	12334.2	3408	19166	140.379	1924128	1851662	0.450817	extracellular	24
grdaisifhyakgqpyid	D	1	61	0.011	10295.1	4343	18066	117.172	1606033	1533567	0.373371	extracellular	25
aisifhyakgqpyidevg	D	2	62	0.011	5085.87	3104	7303	57.884	793396	720930	0.175522	extracellular	26
ifhyakgqpyidevgtfk	D	3	63	0.011	8326.15	5042	12532	94.763	1298879	1226413	0.29859	extracellular	27
yakgqpyidevgtfkeri	D	4	64	0.011	11111.7	7239	15304	126.466	1733425	1660959	0.404387	extracellular	28
gqpyidevgtfkeriqwv	D	5	65	0.011	7997.78	5372	12454	91.025	1247653	1175187	0.286118	extracellular	29
yidevgtfkeriqwvgdp	D	6	66	0.011	4059.65	2781	5531	46.204	633305	560839	0.136545	extracellular	30
evgtfkeriqwvgdprwk	D	7	67	0.011	5632.14	3325	8541	64.101	878614	806148	0.19627	extracellular	31
tfkeriqwvgdprwkdgs	D	8	68	0.011	5147.61	3466	6627	58.587	803028	730562	0.177867	extracellular	32
eriqwvgdprwkdgsivi	D	9	69	0.011	9610.72	5028	14177	109.383	1499273	1426807	0.347379	extracellular	33
qwvgdprwkdgsivihnl	D	10	70	0.011	11489.1	5927	16013	130.761	1792300	1719834	0.418721	extracellular	34
gdprwkdgsivihnldys	D	11	71	0.011	9269.1	5804	11738	105.495	1445980	1373514	0.334404	extracellular	35
rwkdgsivihnldysdng	D	12	72	0.011	7367.95	4462	10384	83.857	1149401	1076935	0.262197	extracellular	36
dgsivihnldysdngtft	D	13	73	0.011	6601.8	4354	8254	75.137	1029880	957414	0.233098	extracellular	37
ivihnldysdngtftcdv	D	14	74	0.011	4028.19	2879	5687	45.846	628397	555931	0.13535	extracellular	38
hnldysdngtftcdvknp	D	15	75	0.011	9717.81	6043	13621	110.602	1515979	1443513	0.351446	extracellular	39
dysdngtftcdvknppdi	D	16	76	0.011	12381.5	6693	16826	140.918	1931515	1859049	0.452615	extracellular	40
dngtftcdvknppdivgk	D	17	77	0.011	9770.53	6000	12456	111.202	1524203	1451737	0.353449	extracellular	41
tftcdvknppdivgktsq	D	18	78	0.011	12173.1	4054	20393	138.546	1899010	1826544	0.444701	extracellular	42
cdvknppdivgktsqvtl	D	19	79	0.011	12309.9	5297	21926	140.102	1920337	1847871	0.449894	extracellular	43
knppdivgktsqvtlyvf	D	20	80	0.011	6434.93	3675	8904	73.238	1003849	931383	0.22676	extracellular	44
pdivgktsqvtlyvfekv	E	1	81	0.011	3989.21	2804	5488	45.402	622317	549851	0.13387	extracellular	45
vgktsqvtlyvfekvptr	E	2	82	0.011	3430.22	2262	6259	39.04	535115	462649	0.112639	extracellular	46
tsqvtlyvfekvptrygv	E	3	83	0.011	6299.74	4026	16168	71.699	982759	910293	0.221625	TM	47
vtlyvfekvptrygvvlg	E	4	84	0.011	9151.13	5990	11857	104.152	1427576	1355110	0.329923	TM	48
yvfekvptrygvvlgavi	E	5	85	0.011	7251.8	4919	9412	82.535	1131281	1058815	0.257785	TM	49
ekvptrygvvlgaviggi	E	6	86	0.011	9172.24	4759	13161	104.392	1430870	1358404	0.330725	TM	50
ptrygvvlgaviggilgv	E	7	87	0.011	9713.54	5670	13815	110.553	1515312	1442846	0.351284	TM	51
ygvvlgaviggilgvvll	E	8	88	0.011	9683.97	3231	15085	110.216	1510700	1438234	0.350161	TM	52
vlgaviggilgvvlllll	E	9	89	0.011	14584.2	7854	19007	165.988	2275142	2202676	0.536277	TM	53
aviggilgvvllllllfy	E	10	90	0.011	20347.7	6618	30781	231.583	3174237	3101771	0.755176	TM	54
ggilgvvllllllfylir	E	11	91	0.011	19750.9	4191	33660	224.792	3081148	3008682	0.732512	TM	55
lgvvllllllfylirycw	E	12	92	0.011	20295.1	4240	41109	230.985	3166038	3093572	0.75318	cytosolic	56
vllllllfylirycwlrr	E	13	93	0.011	25497.9	9433	37666	290.199	3977667	3905201	0.950784	cytosolic	57
llllfylirycwlrrqaa	E	14	94	0.011	23226.1	8234	30698	264.343	3623268	3550802	0.8645	cytosolic	58
lfylirycwlrrqaalqr	E	15	95	0.011	19380.4	10459	23895	220.575	3023349	2950883	0.71844	cytosolic	59
lirycwlrrqaalqrrls	E	16	96	0.011	15702.1	7097	20734	178.711	2449534	2377068	0.578735	cytosolic	60
ycwlrrqaalqrrlsame	E	17	97	0.011	12087.5	6905	14978	137.572	1885652	1813186	0.441449	cytosolic	61
lrrqaalqrrlsamekgr	E	18	98	0.011	10409.6	6361	16605	118.476	1623905	1551439	0.377723	cytosolic	62
qaalqrrlsamekgrfhk	E	19	99	0.011	6366.35	3728	13075	72.457	993150	920684	0.224155	cytosolic	63
lqrrlsamekgrfhkssk	E	20	100	0.011	12259.9	3277	16566	139.534	1912552	1840086	0.447998	cytosolic	64
rlsamekgrfhksskdss	F	1	101	0.011	10744.9	4595	17567	122.291	1676205	1603739	0.390456	cytosolic	65
amekgrfhksskdsskrg	F	2	102	0.011	11965.1	4031	19080	136.179	1866562	1794096	0.436801	cytosolic	66
kgrfhksskdsskrgrqt	F	3	103	0.011	6487.56	3881	16478	73.837	1012059	939593	0.228759	cytosolic	67
fhksskdsskrgrqtpvl	F	4	104	0.011	10709.9	5699	19146	121.893	1670748	1598282	0.389127	cytosolic	68
sskdsskrgrqtpvlyam	F	5	105	0.011	6870.82	3229	26190	78.199	1071848	999382	0.243316	cytosolic	69
dsskrgrqtpvlyamldh	F	6	106	0.011	5085.31	3673	7060	57.878	793308	720842	0.175501	cytosolic	70
krgrqtpvlyamldhsrs	F	7	107	0.011	4053.97	2829	7477	46.139	632419	559953	0.13633	cytosolic	71
rqtpvlyamldhsrstka	F	8	108	0.011	3417.94	2546	4435	38.901	533199	460733	0.112173	cytosolic	72
pvlyamldhsrstkaase	F	9	109	0.011	4636.9	3718	6225	52.774	723357	650891	0.15847	cytosolic	73
yamldhsrstkaasekks	F	10	110	0.011	3813.95	2842	5272	43.408	594976	522510	0.127213	cytosolic	74
ldhsrstkaasekkskgl	F	11	111	0.011	5290.08	3759	10240	60.208	825252	752786	0.183278	cytosolic	75
srstkaasekkskglges	F	12	112	0.011	7208.97	4031	9341	82.048	1124599	1052133	0.256159	cytosolic	76
tkaasekkskglgesrkd	F	13	113	0.011	4863.9	3768	8032	55.358	758769	686303	0.167091	cytosolic	77
asekkskglgesrkdkkk	F	14	114	0.011	8515.06	6588	10133	96.913	1328350	1255884	0.305765	cytosolic	78

## Sheet: rhodopsin EL1-EL3
peptide	Row	column	ROI	area	mean	min	max	intden	rawintden	Corrected rawintden - min	normalized	domain	arbitrary x-axis
MNGTEGPNFYVPFSNVTG	V	4	424	0.011	5766.39	4633	7382	65.629	899557	827091	0.201646	extracellular 1-36	1
TEGPNFYVPFSNVTGVVR	V	5	425	0.011	8043.66	3999	13791	91.547	1254811	1182345	0.288257	extracellular 1-36	2
PNFYVPFSNVTGVVRSPF	V	6	426	0.011	4468.72	2908	8727	50.86	697121	624655	0.152292	extracellular 1-36	3
YVPFSNVTGVVRSPFEQP	V	7	427	0.011	4572.47	2851	6372	52.041	713306	640840	0.156238	extracellular 1-36	4
FSNVTGVVRSPFEQPQYY	V	8	428	0.011	3479.12	2568	4212	39.597	542743	470277	0.114654	extracellular 1-36	5
VTGVVRSPFEQPQYYLAE	V	9	429	0.011	3045.08	2297	3750	34.657	475033	402567	0.0981463	extracellular 1-36	6
VVRSPFEQPQYYLAEPWQ	V	10	430	0.011	2872.53	2237	3836	32.693	448115	375649	0.0915836	extracellular 1-36	7
SPFEQPQYYLAEPWQLHG	V	11	431	0.011	3779.16	2429	5165	43.012	589549	517083	0.126065	extracellular 1-36	8
EQPQYYLAEPWQLHGYFV	V	12	432	0.011	3715.81	3020	4303	42.291	579666	507200	0.123656	extracellular 1-36	9
QYYLAEPWQLHGYFVFGP	V	13	433	0.011	6851.6	3319	11941	77.98	1068850	996384	0.24292	extracellular 1-36	10
LAEPWQLHGYFVFGPTGC	V	14	434	0.011	6174.52	4230	7794	70.274	963225	890759	0.217168	extracellular 97-110	11
PWQLHGYFVFGPTGCNLE	V	15	435	0.011	7475.86	3520	11683	85.085	1166234	1093768	0.266662	extracellular 97-110	12
LHGYFVFGPTGCNLERYI	V	16	436	0.011	7790.26	4032	10739	88.663	1215281	1142815	0.27862	extracellular 97-110	13
YFVFGPTGCNLERYIPEG	V	17	437	0.011	3609.63	2673	4090	41.082	563102	490636	0.119618	extracellular 97-110	14
FGPTGCNLERYIPEGMQC	V	18	438	0.011	10478.5	5238	18451	119.259	1634647	1562181	0.380861	extracellular 97-110	15
TGCNLERYIPEGMQCSCG	V	19	439	0.011	7836.22	4541	14029	89.186	1222450	1149984	0.280367	extracellular 174-202	16
NLERYIPEGMQCSCGIDY	V	20	440	0.011	2998.94	1510	5737	34.132	467834	395368	0.0963912	extracellular 174-202	17
RYIPEGMQCSCGIDYYTL	W	1	441	0.011	9057.27	3134	13918	103.084	1412934	1340468	0.326808	extracellular 174-202	18
PEGMQCSCGIDYYTLKPE	W	2	442	0.011	11090.7	4099	20260	126.226	1730142	1657676	0.404143	extracellular 174-202	19
MQCSCGIDYYTLKPEVNN	W	3	443	0.011	11369.9	4571	20981	129.404	1773698	1701232	0.414762	extracellular 174-202	20
SCGIDYYTLKPEVNNEST	W	4	444	0.011	10006.8	4678	19546	113.891	1561065	1488599	0.362922	extracellular 174-202	21
IDYYTLKPEVNNESTHQG	W	5	445	0.011	9570.51	3737	16734	108.925	1492999	1420533	0.346328	extracellular 174-202	22
YTLKPEVNNESTHQGSNF	W	6	446	0.011	6041.85	3284	8201	68.764	942528	870062	0.212122	extracellular 174-202	23
KPEVNNESTHQGSNFMNG	W	7	447	0.011	6501.64	2949	9670	73.997	1014255	941789	0.229609	extracellular 174-202	24
VNNESTHQGSNFMNGTEG	W	8	448	0.011	2349.72	1549	4287	26.743	366557	294091	0.0716997	extracellular 174-202	25
ESTHQGSNFMNGTEGPNF	W	9	449	0.011	2516.28	1770	3633	28.639	392540	320074	0.0780344	extracellular 275-286	26
HQGSNFMNGTEGPNFYVP	W	10	450	0.011	2773.08	1975	3619	31.561	432601	360135	0.0878013	extracellular 275-286	27
SNFMNGTEGPNFYVPFSN	W	11	451	0.011	2629.97	1970	3935	29.933	410276	337810	0.0823585	extracellular 275-286	28

## Sheet: aa comp
peptide	Row	column	ROI	area	mean	min	max	intden	rawintden	Corrected rawintden - min	normalized	average		aa	%enriched (avg + stdev)	total	fold-enrichment (avg + stdev)	log2 fold-enrichment (avg + stdev)				category	fold-enrichment (avg + stdev)	log2 fold-enrichment (avg + stdev)
ryqpeggrdaisifhyak	C	19	59	0.011	26757.5	11997	37812	304.536	4174170	4101704	0.998626	1.31167e+06		Ala (A) 12	0.056	0.048	1.16667	0.222392		Ala	(A)	hb-a	1.16667	0.222392
vllllllfylirycwlrr	E	13	93	0.011	25497.9	9433	37666	290.199	3977667	3905201	0.950784			Arg (R) 25	0.116	0.055	2.10909	1.07662		Gly	(G)	hb-a	1.02326	0.0331669
llllfylirycwlrrqaa	E	14	94	0.011	23226.1	8234	30698	264.343	3623268	3550802	0.8645	st dev		Asn (N) 0	0	0.031	0	#NUM!		Ile	(I)	hb-a	1.66	0.731183
ftwryqpeggrdaisifh	C	18	58	0.011	21711.8	10939	32517	247.108	3387033	3314567	0.806985	797343		Asp (D) 7	0.032	0.045	0.711111	-0.491853		Leu	(L)	hb-a	2.80233	1.48662
aviggilgvvllllllfy	E	10	90	0.011	20347.7	6618	30781	231.583	3174237	3101771	0.755176			Cys (C) 5	0.023	0.019	1.21053	0.275634		Val	(V)	hb-a	0.731707	-0.450661
lgvvllllllfylirycw	E	12	92	0.011	20295.1	4240	41109	230.985	3166038	3093572	0.75318	AVERAGE + ST DEV		Gln (Q) 9	0.042	0.041	1.02439	0.0347654		Phe	(F)	hb-ar	1.08511	0.117836
ggilgvvllllllfylir	E	11	91	0.011	19750.9	4191	33660	224.792	3081148	3008682	0.732512	2.10902e+06		Glu (E) 4	0.019	0.049	0.387755	-1.36678		Trp	(W)	hb-ar	1.68182	0.750022
lfylirycwlrrqaalqr	E	15	95	0.011	19380.4	10459	23895	220.575	3023349	2950883	0.71844			Gly (G) 19	0.088	0.086	1.02326	0.0331669		Tyr	(Y)	hb-ar	1.29825	0.376563
diSftwryqpeggrdais	C	17	57	0.011	19370.8	12010	24665	220.465	3021838	2949372	0.718072			His (H) 2	0.009	0.022	0.409091	-1.28951		Pro	(P)	hb-az	0.339286	-1.55943
vsddiSftwryqpeggrd	C	16	56	0.011	17406.2	8515	23049	198.106	2715371	2642905	0.643458			Ile (I) 18	0.083	0.05	1.66	0.731183		Cys	(C)	hb-s	1.21053	0.275634
lirycwlrrqaalqrrls	E	16	96	0.011	15702.1	7097	20734	178.711	2449534	2377068	0.578735			Leu (L) 52	0.241	0.086	2.80233	1.48662		Gln	(Q)	hc	1.02439	0.0347654
vlgaviggilgvvlllll	E	9	89	0.011	14584.2	7854	19007	165.988	2275142	2202676	0.536277			Lys (K) 1	0.005	0.048	0.104167	-3.26303		His	(H)	hc	0.409091	-1.28951
sewvsddiSftwryqpeg	C	15	55	0.011	13515.3	6780	20169	153.822	2108393	2035927	0.495679			Met (M) 0	0	0.013	0	#NUM!		Ser	(S)	hc	0.344086	-1.53916
dysdngtftcdvknppdi	D	16	76	0.011	12381.5	6693	16826	140.918	1931515	1859049	0.452615			Phe (F) 11	0.051	0.047	1.08511	0.117836		Thr	(T)	hc	0.28	-1.8365
peggrdaisifhyakgqp	C	20	60	0.011	12334.2	3408	19166	140.379	1924128	1851662	0.450817			Pro (P) 4	0.019	0.056	0.339286	-1.55943		Asp	(D)	n	0.711111	-0.491853
cdvknppdivgktsqvtl	D	19	79	0.011	12309.9	5297	21926	140.102	1920337	1847871	0.449894			Ser (S) 7	0.032	0.093	0.344086	-1.53916		Glu	(E)	n	0.387755	-1.36678
lqrrlsamekgrfhkssk	E	20	100	0.011	12259.9	3277	16566	139.534	1912552	1840086	0.447998			Thr (T) 3	0.014	0.05	0.28	-1.8365		Arg	(R)	p	2.10909	1.07662
fwssewvsddiSftwryq	C	14	54	0.011	12238.7	7049	16637	139.293	1909239	1836773	0.447192			Trp (W) 8	0.037	0.022	1.68182	0.750022		Lys	(K)	p	0.104167	-3.26303
tftcdvknppdivgktsq	D	18	78	0.011	12173.1	4054	20393	138.546	1899010	1826544	0.444701			Tyr (Y) 16	0.074	0.057	1.29825	0.376563
ycwlrrqaalqrrlsame	E	17	97	0.011	12087.5	6905	14978	137.572	1885652	1813186	0.441449			Val (V) 13	0.06	0.082	0.731707	-0.450661
amekgrfhksskdsskrg	F	2	102	0.011	11965.1	4031	19080	136.179	1866562	1794096	0.436801
qwvgdprwkdgsivihnl	D	10	70	0.011	11489.1	5927	16013	130.761	1792300	1719834	0.418721
MQCSCGIDYYTLKPEVNN	W	3	443	0.011	11369.9	4571	20981	129.404	1773698	1701232	0.414762
yakgqpyidevgtfkeri	D	4	64	0.011	11111.7	7239	15304	126.466	1733425	1660959	0.404387
PEGMQCSCGIDYYTLKPE	W	2	442	0.011	11090.7	4099	20260	126.226	1730142	1657676	0.404143
rlsamekgrfhksskdss	F	1	101	0.011	10744.9	4595	17567	122.291	1676205	1603739	0.390456
fhksskdsskrgrqtpvl	F	4	104	0.011	10709.9	5699	19146	121.893	1670748	1598282	0.389127
FGPTGCNLERYIPEGMQC	V	18	438	0.011	10478.5	5238	18451	119.259	1634647	1562181	0.380861
spalaivvytdreiygav	C	5	45	0.011	10419.5	6084	15362	118.587	1625439	1552973	0.378096
lrrqaalqrrlsamekgr	E	18	98	0.011	10409.6	6361	16605	118.476	1623905	1551439	0.377723
fsslvlspalaivvytdr	C	3	43	0.011	10354.9	5496	14527	117.853	1615370	1542904	0.375645
grdaisifhyakgqpyid	D	1	61	0.011	10295.1	4343	18066	117.172	1606033	1533567	0.373371
lvlspalaivvytdreiy	C	4	44	0.011	10056.9	5409	14853	114.461	1568876	1496410	0.364325
SCGIDYYTLKPEVNNEST	W	4	444	0.011	10006.8	4678	19546	113.891	1561065	1488599	0.362922
dngtftcdvknppdivgk	D	17	77	0.011	9770.53	6000	12456	111.202	1524203	1451737	0.353449
hnldysdngtftcdvknp	D	15	75	0.011	9717.81	6043	13621	110.602	1515979	1443513	0.351446
ptrygvvlgaviggilgv	E	7	87	0.011	9713.54	5670	13815	110.553	1515312	1442846	0.351284
ygvvlgaviggilgvvll	E	8	88	0.011	9683.97	3231	15085	110.216	1510700	1438234	0.350161
eriqwvgdprwkdgsivi	D	9	69	0.011	9610.72	5028	14177	109.383	1499273	1426807	0.347379
IDYYTLKPEVNNESTHQG	W	5	445	0.011	9570.51	3737	16734	108.925	1492999	1420533	0.346328
mapgapssspspilaall	B	17	37	0.011	9494.38	6154	16150	108.059	1481123	1408657	0.34296
gdprwkdgsivihnldys	D	11	71	0.011	9269.1	5804	11738	105.495	1445980	1373514	0.334404
ekvptrygvvlgaviggi	E	6	86	0.011	9172.24	4759	13161	104.392	1430870	1358404	0.330725
vtlyvfekvptrygvvlg	E	4	84	0.011	9151.13	5990	11857	104.152	1427576	1355110	0.329923
hcsfwssewvsddiSftw	C	13	53	0.011	9140.1	5021	24647	104.026	1425856	1353390	0.329505
RYIPEGMQCSCGIDYYTL	W	1	441	0.011	9057.27	3134	13918	103.084	1412934	1340468	0.326808
gapssspspilaallfss	B	18	38	0.011	8862.44	5271	16820	100.866	1382541	1310075	0.318959
asekkskglgesrkdkkk	F	14	114	0.011	8515.06	6588	10133	96.913	1328350	1255884	0.305765
vvytdreiygavgsqvtl	C	7	47	0.011	8439.79	3439	13765	96.056	1316607	1244141	0.302906
vtlhcsfwssewvsddiS	C	12	52	0.011	8355.65	3902	13347	95.098	1303481	1231015	0.29971
ifhyakgqpyidevgtfk	D	3	63	0.011	8326.15	5042	12532	94.763	1298879	1226413	0.29859
TEGPNFYVPFSNVTGVVR	V	5	425	0.011	8043.66	3999	13791	91.547	1254811	1182345	0.288257
gqpyidevgtfkeriqwv	D	5	65	0.011	7997.78	5372	12454	91.025	1247653	1175187	0.286118
gavgsqvtlhcsfwssew	C	10	50	0.011	7917.1	4514	11285	90.107	1235067	1162601	0.283054
TGCNLERYIPEGMQCSCG	V	19	439	0.011	7836.22	4541	14029	89.186	1222450	1149984	0.280367
LHGYFVFGPTGCNLERYI	V	16	436	0.011	7790.26	4032	10739	88.663	1215281	1142815	0.27862
laivvytdreiygavgsq	C	6	46	0.011	7590.16	4274	11396	86.386	1184065	1111599	0.270637
PWQLHGYFVFGPTGCNLE	V	15	435	0.011	7475.86	3520	11683	85.085	1166234	1093768	0.266662
rwkdgsivihnldysdng	D	12	72	0.011	7367.95	4462	10384	83.857	1149401	1076935	0.262197
yvfekvptrygvvlgavi	E	5	85	0.011	7251.8	4919	9412	82.535	1131281	1058815	0.257785
eiygavgsqvtlhcsfws	C	9	49	0.011	7231.93	3880	12342	82.309	1128181	1055715	0.257031
srstkaasekkskglges	F	12	112	0.011	7208.97	4031	9341	82.048	1124599	1052133	0.256159
sskdsskrgrqtpvlyam	F	5	105	0.011	6870.82	3229	26190	78.199	1071848	999382	0.243316
QYYLAEPWQLHGYFVFGP	V	13	433	0.011	6851.6	3319	11941	77.98	1068850	996384	0.24292
gsqvtlhcsfwssewvsd	C	11	51	0.011	6656.6	3299	11129	75.761	1038430	965964	0.235179
dgsivihnldysdngtft	D	13	73	0.011	6601.8	4354	8254	75.137	1029880	957414	0.233098
KPEVNNESTHQGSNFMNG	W	7	447	0.011	6501.64	2949	9670	73.997	1014255	941789	0.229609
kgrfhksskdsskrgrqt	F	3	103	0.011	6487.56	3881	16478	73.837	1012059	939593	0.228759
knppdivgktsqvtlyvf	D	20	80	0.011	6434.93	3675	8904	73.238	1003849	931383	0.22676
qaalqrrlsamekgrfhk	E	19	99	0.011	6366.35	3728	13075	72.457	993150	920684	0.224155
tsqvtlyvfekvptrygv	E	3	83	0.011	6299.74	4026	16168	71.699	982759	910293	0.221625
LAEPWQLHGYFVFGPTGC	V	14	434	0.011	6174.52	4230	7794	70.274	963225	890759	0.217168
YTLKPEVNNESTHQGSNF	W	6	446	0.011	6041.85	3284	8201	68.764	942528	870062	0.212122
MNGTEGPNFYVPFSNVTG	V	4	424	0.011	5766.39	4633	7382	65.629	899557	827091	0.201646
ilaallfsslvlspalai	C	1	41	0.011	5667.2	3505	8253	64.5	884083	811617	0.197601
evgtfkeriqwvgdprwk	D	7	67	0.011	5632.14	3325	8541	64.101	878614	806148	0.19627
tdreiygavgsqvtlhcs	C	8	48	0.011	5624.79	3500	8372	64.018	877467	805001	0.19599
ssspspilaallfsslvl	B	19	39	0.011	5487.83	4425	7385	62.459	856102	783636	0.190789
ldhsrstkaasekkskgl	F	11	111	0.011	5290.08	3759	10240	60.208	825252	752786	0.183278
tfkeriqwvgdprwkdgs	D	8	68	0.011	5147.61	3466	6627	58.587	803028	730562	0.177867
aisifhyakgqpyidevg	D	2	62	0.011	5085.87	3104	7303	57.884	793396	720930	0.175522
dsskrgrqtpvlyamldh	F	6	106	0.011	5085.31	3673	7060	57.878	793308	720842	0.175501
tkaasekkskglgesrkd	F	13	113	0.011	4863.9	3768	8032	55.358	758769	686303	0.167091
pvlyamldhsrstkaase	F	9	109	0.011	4636.9	3718	6225	52.774	723357	650891	0.15847
YVPFSNVTGVVRSPFEQP	V	7	427	0.011	4572.47	2851	6372	52.041	713306	640840	0.156238
PNFYVPFSNVTGVVRSPF	V	6	426	0.011	4468.72	2908	8727	50.86	697121	624655	0.152292
allfsslvlspalaivvy	C	2	42	0.011	4132.17	2839	8351	47.03	644619	572153	0.1393
yidevgtfkeriqwvgdp	D	6	66	0.011	4059.65	2781	5531	46.204	633305	560839	0.136545
krgrqtpvlyamldhsrs	F	7	107	0.011	4053.97	2829	7477	46.139	632419	559953	0.13633
ivihnldysdngtftcdv	D	14	74	0.011	4028.19	2879	5687	45.846	628397	555931	0.13535
pdivgktsqvtlyvfekv	E	1	81	0.011	3989.21	2804	5488	45.402	622317	549851	0.13387
yamldhsrstkaasekks	F	10	110	0.011	3813.95	2842	5272	43.408	594976	522510	0.127213
pspilaallfsslvlspa	B	20	40	0.011	3798.54	3028	5021	43.232	592572	520106	0.126628
SPFEQPQYYLAEPWQLHG	V	11	431	0.011	3779.16	2429	5165	43.012	589549	517083	0.126065
EQPQYYLAEPWQLHGYFV	V	12	432	0.011	3715.81	3020	4303	42.291	579666	507200	0.123656
YFVFGPTGCNLERYIPEG	V	17	437	0.011	3609.63	2673	4090	41.082	563102	490636	0.119618
FSNVTGVVRSPFEQPQYY	V	8	428	0.011	3479.12	2568	4212	39.597	542743	470277	0.114654
vgktsqvtlyvfekvptr	E	2	82	0.011	3430.22	2262	6259	39.04	535115	462649	0.112639
rqtpvlyamldhsrstka	F	8	108	0.011	3417.94	2546	4435	38.901	533199	460733	0.112173
VTGVVRSPFEQPQYYLAE	V	9	429	0.011	3045.08	2297	3750	34.657	475033	402567	0.0981463
NLERYIPEGMQCSCGIDY	V	20	440	0.011	2998.94	1510	5737	34.132	467834	395368	0.0963912
VVRSPFEQPQYYLAEPWQ	V	10	430	0.011	2872.53	2237	3836	32.693	448115	375649	0.0915836
HQGSNFMNGTEGPNFYVP	W	10	450	0.011	2773.08	1975	3619	31.561	432601	360135	0.0878013
SNFMNGTEGPNFYVPFSN	W	11	451	0.011	2629.97	1970	3935	29.933	410276	337810	0.0823585
ESTHQGSNFMNGTEGPNF	W	9	449	0.011	2516.28	1770	3633	28.639	392540	320074	0.0780344
VNNESTHQGSNFMNGTEG	W	8	448	0.011	2349.72	1549	4287	26.743	366557	294091	0.0716997
